# Supplementary material for: PRDM16 functions as a co-repressor in the BMP pathway to suppress neural stem cell proliferation
Source: eLife. 2025 Jul 14;14:RP104076. doi: 10.7554/eLife.104076 (PMC12259022; doi:10.7554/eLife.104076)
Supplement: Figure 1—figure supplement 1—source data 1. [file elife-104076-fig1-figsupp1-data1.xlsx]

## Sheet: Figure 1 supplement 1D
	SOX2 Intensity
	Genotypes	CH-1	Lamina terminalis-1	CH-2	Lamina terminalis-2	CH-3	Lamina terminalis-3			ChP-1	ChP-2	ChP-3		ratio
	SUcGT-1 ctr	43.665	44.687	44.242	44.646	46.371	41.859	44.245		19.402	17.39	17.519	18.1037	0.409169
	SUcGT-2 mut	46.677	40.649	46.417	46.37	45.157	42.308	44.5963		36.024	37.77	42.818	38.8707	0.871611
	SUcGT-3 ctr	55.006	46.982	65.83	48.587	55.5	44.016	52.6535		22.453	18.482	20.03	20.3217	0.385951
	SUcGT-6 mut	45.067	46.327	57.984	39.424	57.463	40.283	47.758		37.471	34.42	42.592	38.161	0.799049
	SUcGT-12 ctr	31.854	36.663	28.396	32.441	28.424	29.238	31.1693		14.256	11.239	12.908	12.801	0.410692
	SUcGT-14 mut	36.215	43.029	41.978	35.667	36.154	35.825	38.1447		30.118	31.69	27.971	29.9263	0.784548
