# Supplementary material for: PRDM16 functions as a co-repressor in the BMP pathway to suppress neural stem cell proliferation
Source: eLife. 2025 Jul 14;14:RP104076. doi: 10.7554/eLife.104076 (PMC12259022; doi:10.7554/eLife.104076)
Supplement: Figure 1—source data 1. [file elife-104076-fig1-data1.xlsx]

## Sheet: Figure 1D
	Genotypes	EdU positive	DAPI	fraction
	SUcGT-7 ctr	3	35	0.0857143
	SUcGT-3 ctr	15	85	0.176471
	SUcGT-1 ctr	2	33	0.0606061
	SUcGT-2 mut	33	59	0.559322
	SUcGT-6 mut	34	55	0.618182
	SUcGT-8 mut	32	61	0.52459
