# Supplementary material for: PRDM16 functions as a co-repressor in the BMP pathway to suppress neural stem cell proliferation
Source: eLife. 2025 Jul 14;14:RP104076. doi: 10.7554/eLife.104076 (PMC12259022; doi:10.7554/eLife.104076)
Supplement: Figure 1—source data 2. [file elife-104076-fig1-data2.xlsx]

## Sheet: Figure 1E
	Genotypes	Number of DCX positive cells	DAPI (total number of cells)	fraction
	SUcGT-12 WT	0	197	0
	SUcGT-13 WT	0	218	0
	SUcGT-3 WT	0	187	0
	SUcGT-2 mut	19	211	0.0900474
	SUcGT-6 mut	17	236	0.0720339
	SUcGT-14 mut	16	227	0.0704846
