# Supplementary material for: PRDM16 functions as a co-repressor in the BMP pathway to suppress neural stem cell proliferation
Source: eLife. 2025 Jul 14;14:RP104076. doi: 10.7554/eLife.104076 (PMC12259022; doi:10.7554/eLife.104076)
Supplement: Figure 1—source data 3. [file elife-104076-fig1-data3.xlsx]

## Sheet: Figure 1G
	Genotypes	DAPI	BrdU positiveEdU positive		BrdU EdU positive	fraction of BrdU	fraction of EdU	Fraction of BrdU+EdU
	SUcGT-1 WT	294	25	26	9	0.085034	0.0884354	0.0306122
	SUcGT-2 WT	253	18	29	10	0.0711462	0.114625	0.0395257
	SUcGT-7 WT	276	18	22	7	0.0652174	0.0797101	0.0253623
	SUcGT-11 Mut	128	33	63	16	0.257812	0.492188	0.125
	SUcGT-12 Mut	113	34	42	10	0.300885	0.371681	0.0884956
	SUcGT-13 Mut	143	55	60	10	0.384615	0.41958	0.0699301
						0.00308735	0.00686225	0.0199138
