# Supplementary material for: PRDM16 functions as a co-repressor in the BMP pathway to suppress neural stem cell proliferation
Source: eLife. 2025 Jul 14;14:RP104076. doi: 10.7554/eLife.104076 (PMC12259022; doi:10.7554/eLife.104076)
Supplement: Figure 2—figure supplement 1—source data 1. [file elife-104076-fig2-figsupp1-data1.xlsx]

## Sheet: Figure 2 Figure supplement 1B
	Samples	Cq (Prdm16)	Cq(18S)
	Wt wo BMP4_1	29.6061	14.0248	2.03965e-05
	Wt wo BMP4_2	30.1347	13.8483	1.25111e-05
	Wt wo BMP4_3	29.915	13.4749	1.12477e-05
	Wt_BMP4_1	27.9019	14.1809	7.40568e-05
	Wt_BMP4_2	28.8475	13.8801	3.12149e-05
	Wt_BMP4_3	28.4632	14.1114	4.78261e-05
	KO wo BMP4_1	32.758	14.025	2.29505e-06
	KO wo BMP4_2	32.5053	14.1085	2.89734e-06
	KO wo BMP4_3	33.1396	13.8477	1.55798e-06
	KO BMP4_1	30.9722	13.9381	7.45146e-06
	KO BMP4_2	33.3765	14.3722	1.90168e-06
	KO BMP4_3	33.9188	14.0703	1.05925e-06
	OE wo BMP4_1	21.2028	14.3687	0.00876476
	OE wo BMP4_2	20.7977	14.0687	0.00942726
	OE wo BMP4_3	20.8273	14.2643	0.0105762
	OE BMP4_1	22.0799	14.3151	0.00459781
	OE BMP4_2	21.4073	13.7903	0.00509384
	OE BMP4_3	21.5092	14.1227	0.00597632
