# Supplementary material for: PRDM16 functions as a co-repressor in the BMP pathway to suppress neural stem cell proliferation
Source: eLife. 2025 Jul 14;14:RP104076. doi: 10.7554/eLife.104076 (PMC12259022; doi:10.7554/eLife.104076)
Supplement: Figure 2—figure supplement 1—source data 2. [file elife-104076-fig2-figsupp1-data2.xlsx]

## Sheet: Figure 2 Figure supplement 1D
	Samples	Ki67	DAPI	Ki67%
	Prdm16_OE NoBMP4_1	457	2007	0.227703
	Prdm16_OE NoBMP4_2	516	1711	0.301578
	Prdm16_OE NoBMP4_3	874	1857	0.470652
	Prdm16_OE +BMP4_1	33	1144	0.0288462
	Prdm16_OE +BMP4_2	58	1288	0.0450311
	Prdm16_OE +BMP4_3	42	1298	0.0323575
	Prdm16_OE +BMP4 washout_1	268	1401	0.191292
	Prdm16_OE +BMP4 washout_2	259	1538	0.168401
	Prdm16_OE +BMP4 washout_3	262	1492	0.175603
	KO_CDH NoBMP4_1	792	1615	0.490402
	KO_CDH NoBMP4_2	683	1470	0.464626
	KO_CDH NoBMP4_3	826	1685	0.490208
	KO_CDH +BMP4_1	254	1949	0.130323
	KO_CDH +BMP4_2	292	1776	0.164414
	KO_CDH +BMP4_3	455	2012	0.226143
	KO_CDH +BMP4 washout_1	688	1736	0.396313
	KO_CDH +BMP4 washout_2	795	1872	0.424679
	KO_CDH +BMP4 washout_3	776	1994	0.389168
	wt_CDH no BMP4_1	475	1504	0.315824
	wt_CDH no BMP4_2	557	1299	0.428791
	wt_CDH no BMP4_3	583	1978	0.294742
	wt_CDH + BMP4_1	376	1326	0.28356
	wt_CDH + BMP4_2	423	1195	0.353975
	wt_CDH + BMP4_3	579	2043	0.283407
	wt_CDH +BMP4 washout_1	438	1393	0.314429
	wt_CDH +BMP4 washout_2	496	1410	0.351773
	wt_CDH +BMP4 washout_3	477	1304	0.365798
	KO no BMP4_1	447	1116	0.400538
	KO no BMP4_2	471	1247	0.377706
	KO no BMP4_3	450	1174	0.383305
	KO + BMP4_1	196	901	0.217536
	KO + BMP4_2	168	812	0.206897
	KO + BMP4_3	184	821	0.224117
	KO +BMP4 washout_1	474	1195	0.396653
	KO +BMP4 washout_2	543	1364	0.398094
	KO +BMP4 washout_3	483	1185	0.407595
