# Supplementary material for: PRDM16 functions as a co-repressor in the BMP pathway to suppress neural stem cell proliferation
Source: eLife. 2025 Jul 14;14:RP104076. doi: 10.7554/eLife.104076 (PMC12259022; doi:10.7554/eLife.104076)
Supplement: Figure 2—figure supplement 1—source data 3. [file elife-104076-fig2-figsupp1-data3.xlsx]

## Sheet: Figure 2 Figure supplement 1E
	Samples	EdU	DAPI	EdU%
	Prdm16_OE NoBMP4_1	493	2007	0.24564
	Prdm16_OE NoBMP4_2	490	1711	0.286382
	Prdm16_OE NoBMP4_3	457	1857	0.246096
	Prdm16_OE +BMP4_1	3	1144	0.00262238
	Prdm16_OE +BMP4_2	4	1288	0.00310559
	Prdm16_OE +BMP4_3	3	1298	0.00231125
	Prdm16_OE +BMP4 washout_1	77	1401	0.0549607
	Prdm16_OE +BMP4 washout_2	88	1538	0.0572172
	Prdm16_OE +BMP4 washout_3	92	1492	0.0616622
	KO_CDH NoBMP4_1	542	1615	0.335604
	KO_CDH NoBMP4_2	551	1470	0.37483
	KO_CDH NoBMP4_3	583	1685	0.345994
	KO_CDH +BMP4_1	87	1949	0.0446383
	KO_CDH +BMP4_2	87	1776	0.0489865
	KO_CDH +BMP4_3	156	2012	0.0775348
	KO_CDH +BMP4 washout_1	331	1736	0.190668
	KO_CDH +BMP4 washout_2	441	1872	0.235577
	KO_CDH +BMP4 washout_3	462	1994	0.231695
	wt_CDH no BMP4_1	397	1504	0.263963
	wt_CDH no BMP4_2	448	1299	0.344881
	wt_CDH no BMP4_3	466	1978	0.235592
	wt_CDH + BMP4_1	220	1326	0.165913
	wt_CDH + BMP4_2	213	1195	0.178243
	wt_CDH + BMP4_3	309	2043	0.151248
	wt_CDH +BMP4 washout_1	74	1393	0.0531228
	wt_CDH +BMP4 washout_2	108	1410	0.0765957
	wt_CDH +BMP4 washout_3	75	1304	0.0575153
	KO no BMP4_1	330	1116	0.295699
	KO no BMP4_2	358	1247	0.287089
	KO no BMP4_3	332	1174	0.282794
	KO + BMP4_1	84	901	0.0932297
	KO + BMP4_2	78	812	0.0960591
	KO + BMP4_3	102	821	0.124239
	KO +BMP4 washout_1	274	1195	0.229289
	KO +BMP4 washout_2	306	1364	0.22434
	KO +BMP4 washout_3	247	1185	0.208439
