# Supplementary material for: PRDM16 functions as a co-repressor in the BMP pathway to suppress neural stem cell proliferation
Source: eLife. 2025 Jul 14;14:RP104076. doi: 10.7554/eLife.104076 (PMC12259022; doi:10.7554/eLife.104076)
Supplement: Figure 2—figure supplement 1—source data 4. [file elife-104076-fig2-figsupp1-data4.xlsx]

## Sheet: Figure 2 Figure supplement 1G
	Samples	Cq (Ttr)	Cq (18S)	2dcq
	Prdm16_OE NoBMP4_1	38.6576	17.5056	4.29154e-07
	Prdm16_OE NoBMP4_2	40	18.6252	3.67746e-07
	Prdm16_OE NoBMP4_3	40	19.1788	5.39739e-07
	Prdm16_OE +BMP4_1	34.3093	19.2476	2.92399e-05
	Prdm16_OE +BMP4_2	31.2117	15.1958	1.50922e-05
	Prdm16_OE +BMP4_3	33.8595	19.2344	3.95718e-05
	Prdm16_OE +BMP4 washout_1	37.6868	19.169	2.66444e-06
	Prdm16_OE +BMP4 washout_2	33.6471	17.1081	1.05018e-05
	Prdm16_OE +BMP4 washout_3	34.4874	17.6871	8.76191e-06
	KO_CDH NoBMP4_1	36.6988	16.627	9.07364e-07
	KO_CDH NoBMP4_2	36.4596	18.9952	5.52936e-06
	KO_CDH NoBMP4_3	39.5197	20.7167	2.18631e-06
	KO_CDH +BMP4_1	36.6273	18.0716	2.59526e-06
	KO_CDH +BMP4_2	37.308	20.89	1.14211e-05
	KO_CDH +BMP4_3	34.1176	16.2214	4.09914e-06
	KO_CDH +BMP4 washout_1	37.1179	16.034	3.3451e-06
	KO_CDH +BMP4 washout_2	35.9678	17.5245	2.80537e-06
	KO_CDH +BMP4 washout_3	36.3246	18.97	5.96683e-06
	wt_CDH no BMP4_1	40	17.1273	1.30204e-07
	wt_CDH no BMP4_2	36.4124	14.6044	2.72366e-07
	wt_CDH no BMP4_3	36.3719	18.0548	3.06204e-06
	wt_CDH + BMP4_1	34.9474	16.7943	3.43071e-06
	wt_CDH + BMP4_2	33.1152	15.1904	4.01892e-06
	wt_CDH + BMP4_3	33.1963	15.5502	4.87523e-06
	wt_CDH +BMP4 washout_1	40	18.1763	2.69408e-07
	wt_CDH +BMP4 washout_2	36.229	16.4363	1.10104e-06
	wt_CDH +BMP4 washout_3	35.2737	15.2933	9.66734e-07
	KO no BMP4_1	38.3821	17.2915	4.47809e-07
	KO no BMP4_2	37.4215	19.6796	4.56183e-06
	KO no BMP4_3	37.68	20.5886	7.16112e-06
	KO + BMP4_1	35.669	18.568	7.11383e-06
	KO + BMP4_2	35.7185	18.7484	7.78887e-06
	KO + BMP4_3	35.1978	18.1752	7.51056e-06
	KO +BMP4 washout_1	37.9743	17.2668	5.84004e-07
	KO +BMP4 washout_2	36.4075	16.1551	8.00594e-07
	KO +BMP4 washout_3	40	21.3147	2.37226e-06
