# Supplementary material for: PRDM16 functions as a co-repressor in the BMP pathway to suppress neural stem cell proliferation
Source: eLife. 2025 Jul 14;14:RP104076. doi: 10.7554/eLife.104076 (PMC12259022; doi:10.7554/eLife.104076)
Supplement: Figure 2—source data 1. [file elife-104076-fig2-data1.xlsx]

## Sheet: Figure 2C
	Genotypes	Ki67	DAPI	Ki67%
	Prdm16_OE NoBMP4_1	457	2007	0.227703
	Prdm16_OE NoBMP4_2	516	1711	0.301578
	Prdm16_OE NoBMP4_3	874	1857	0.470652
	Prdm16_OE +BMP4_1	33	1144	0.0288462
	Prdm16_OE +BMP4_2	58	1288	0.0450311
	Prdm16_OE +BMP4_3	42	1298	0.0323575
	Prdm16_OE +BMP4 washout_1	268	1401	0.191292
	Prdm16_OE +BMP4 washout_2	259	1538	0.168401
	Prdm16_OE +BMP4 washout_3	262	1492	0.175603
	Prdm16_KO NoBMP4_1	792	1615	0.490402
	Prdm16_KO NoBMP4_2	683	1470	0.464626
	Prdm16_KO NoBMP4_3	826	1685	0.490208
	Prdm16_KO +BMP4_1	254	1949	0.130323
	Prdm16_KO +BMP4_2	292	1776	0.164414
	Prdm16_KO +BMP4_3	455	2012	0.226143
	Prdm16_KO +BMP4 washout_1	688	1736	0.396313
	Prdm16_KO +BMP4 washout_2	795	1872	0.424679
	Prdm16_KO +BMP4 washout_3	776	1994	0.389168
