# Supplementary material for: PRDM16 functions as a co-repressor in the BMP pathway to suppress neural stem cell proliferation
Source: eLife. 2025 Jul 14;14:RP104076. doi: 10.7554/eLife.104076 (PMC12259022; doi:10.7554/eLife.104076)
Supplement: Figure 2—source data 2. [file elife-104076-fig2-data2.xlsx]

## Sheet: Figure 2D
	Samples	EdU	DAPI	EdU%
	Prdm16_OE NoBMP4_1	493	2007	0.24564
	Prdm16_OE NoBMP4_2	490	1711	0.286382
	Prdm16_OE NoBMP4_3	457	1857	0.246096
	Prdm16_OE +BMP4_1	3	1144	0.00262238
	Prdm16_OE +BMP4_2	4	1288	0.00310559
	Prdm16_OE +BMP4_3	3	1298	0.00231125
	Prdm16_OE +BMP4 washout_1	77	1401	0.0549607
	Prdm16_OE +BMP4 washout_2	88	1538	0.0572172
	Prdm16_OE +BMP4 washout_3	92	1492	0.0616622
	Prdm16_KO NoBMP4_1	542	1615	0.335604
	Prdm16_KO NoBMP4_2	551	1470	0.37483
	Prdm16_KO NoBMP4_3	583	1685	0.345994
	Prdm16_KO +BMP4_1	87	1949	0.0446383
	Prdm16_KO +BMP4_2	87	1776	0.0489865
	Prdm16_KO +BMP4_3	156	2012	0.0775348
	Prdm16_KO +BMP4 washout_1	331	1736	0.190668
	Prdm16_KO +BMP4 washout_2	441	1872	0.235577
	Prdm16_KO +BMP4 washout_3	462	1994	0.231695
