# Supplementary material for: PRDM16 functions as a co-repressor in the BMP pathway to suppress neural stem cell proliferation
Source: eLife. 2025 Jul 14;14:RP104076. doi: 10.7554/eLife.104076 (PMC12259022; doi:10.7554/eLife.104076)
Supplement: Figure 2—source data 3. [file elife-104076-fig2-data3.xlsx]

## Sheet: Figure 2E
	Samples	Cq (Ttr)	Cq (18S)	2ddcq
	Prdm16_OE NoBMP4_1	38.6576	17.5056	4.29154e-07
	Prdm16_OE NoBMP4_2	40	18.6252	3.67746e-07
	Prdm16_OE NoBMP4_3	40	19.1788	5.39739e-07
	Prdm16_OE +BMP4_1	34.3093	19.2476	2.92399e-05
	Prdm16_OE +BMP4_2	31.2117	15.1958	1.50922e-05
	Prdm16_OE +BMP4_3	33.8595	19.2344	3.95718e-05
	Prdm16_OE +BMP4 washout_1	37.6868	19.169	2.66444e-06
	Prdm16_OE +BMP4 washout_2	33.6471	17.1081	1.05018e-05
	Prdm16_OE +BMP4 washout_3	34.4874	17.6871	8.76191e-06
	Prdm16_KO NoBMP4_1	36.6988	16.627	9.07364e-07
	Prdm16_KO NoBMP4_2	36.4596	18.9952	5.52936e-06
	Prdm16_KO NoBMP4_3	39.5197	20.7167	2.18631e-06
	Prdm16_KO +BMP4_1	36.6273	18.0716	2.59526e-06
	Prdm16_KO +BMP4_2	37.308	20.89	1.14211e-05
	Prdm16_KO +BMP4_3	34.1176	16.2214	4.09914e-06
	Prdm16_KO +BMP4 washout_1	37.1179	16.034	3.3451e-06
	Prdm16_KO +BMP4 washout_2	35.9678	17.5245	2.80537e-06
	Prdm16_KO +BMP4 washout_3	36.3246	18.97	5.96683e-06
