# Supplementary material for: PRDM16 functions as a co-repressor in the BMP pathway to suppress neural stem cell proliferation
Source: eLife. 2025 Jul 14;14:RP104076. doi: 10.7554/eLife.104076 (PMC12259022; doi:10.7554/eLife.104076)
Supplement: Figure 3—figure supplement 1—source data 1. [file elife-104076-fig3-figsupp1-data1.xlsx]

## Sheet: Figure 3 Figure supplement 1F
	Samples	Cq (Mybl2)	Cq (18S)	2dCq
	Prdm16_OE NoBMP4_1	30.1959	17.5056	0.000151299
	Prdm16_OE NoBMP4_2	31.1122	18.6252	0.000174192
	Prdm16_OE NoBMP4_3	30.8861	19.1788	0.000299043
	Prdm16_OE +BMP4_1	36.7575	19.2476	5.35784e-06
	Prdm16_OE +BMP4_2	31.2889	15.1958	1.4306e-05
	Prdm16_OE +BMP4_3	35.1206	19.2344	1.65102e-05
	Prdm16_KO NoBMP4_1	29.7315	17.2915	0.000179971
	Prdm16_KO NoBMP4_2	32.8116	19.6796	0.000111394
	Prdm16_KO NoBMP4_3	33.9251	20.5886	9.66755e-05
	Prdm16_KO +BMP4_1	33.8058	18.568	2.58812e-05
	Prdm16_KO +BMP4_2	33.0403	18.7484	4.98544e-05
	Prdm16_KO +BMP4_3	32.5433	18.1752	4.72883e-05
