# Supplementary material for: PRDM16 functions as a co-repressor in the BMP pathway to suppress neural stem cell proliferation
Source: eLife. 2025 Jul 14;14:RP104076. doi: 10.7554/eLife.104076 (PMC12259022; doi:10.7554/eLife.104076)
Supplement: Figure 3—figure supplement 1—source data 2. [file elife-104076-fig3-figsupp1-data2.xlsx]

## Sheet: Figure 3 Figure Supplement 1G
	Samples	Cq (Id3)	Cq (18S)	2dCq
	Prdm16_OE NoBMP4_1	21.6653	14.2052	0.00567911
	Prdm16_OE NoBMP4_2	21.8173	14.2643	0.00532491
	Prdm16_OE NoBMP4_3	22.4397	14.3687	0.00371856
	Prdm16_OE +BMP4_1	19.2958	14.1966	0.0291728
	Prdm16_OE +BMP4_2	19.3948	13.82	0.0209803
	Prdm16_OE +BMP4_3	19.657	14.3151	0.0246551
	Prdm16_KO NoBMP4_1	20.9113	14.2124	0.00962615
	Prdm16_KO NoBMP4_2	21.0262	13.9373	0.00734554
	Prdm16_KO NoBMP4_3	20.6634	14.1475	0.0109274
	Prdm16_KO +BMP4_1	19.2931	14.679	0.0408322
	Prdm16_KO +BMP4_2	19.1927	14.35	0.0348517
	Prdm16_KO +BMP4_3	19.3081	15.2712	0.0609197
