# Supplementary material for: PRDM16 functions as a co-repressor in the BMP pathway to suppress neural stem cell proliferation
Source: eLife. 2025 Jul 14;14:RP104076. doi: 10.7554/eLife.104076 (PMC12259022; doi:10.7554/eLife.104076)
Supplement: Figure 3—figure supplement 1—source data 3. [file elife-104076-fig3-figsupp1-data3.xlsx]

## Sheet: Figure 3 Figure supplement 1I
	Samples	Cq (Spc25)	Cq (18S)	2dCq
	Prdm16_OE NoBMP4_1	28.7296	17.5056	0.000418076
	Prdm16_OE NoBMP4_2	30.1788	18.6252	0.000332669
	Prdm16_OE NoBMP4_3	30.1702	19.1788	0.000491173
	Prdm16_OE +BMP4_1	33.7031	19.2476	4.45101e-05
	Prdm16_OE +BMP4_2	28.154	15.1958	0.000125664
	Prdm16_OE +BMP4_3	34.0478	19.2344	3.473e-05
	Prdm16_KO NoBMP4_1	27.0959	17.2915	0.0011184
	Prdm16_KO NoBMP4_2	30.31	19.6796	0.00063083
	Prdm16_KO NoBMP4_3	31.652	20.5886	0.000467281
	Prdm16_KO +BMP4_1	30.7111	18.568	0.000221088
	Prdm16_KO +BMP4_2	30.373	18.7484	0.000316693
	Prdm16_KO +BMP4_3	29.7538	18.1752	0.000326963
