# Supplementary material for: PRDM16 functions as a co-repressor in the BMP pathway to suppress neural stem cell proliferation
Source: eLife. 2025 Jul 14;14:RP104076. doi: 10.7554/eLife.104076 (PMC12259022; doi:10.7554/eLife.104076)
Supplement: Figure 3—figure supplement 1—source data 4. [file elife-104076-fig3-figsupp1-data4.xlsx]

## Sheet: Figure 3 Figure supplement 1J
	Samples	Cq (Ndc80)	Cq (18S)	2dCq
	Prdm16_OE NoBMP4_1	29.5256	17.5056	0.000240786
	Prdm16_OE NoBMP4_2	30.8216	18.6252	0.000213069
	Prdm16_OE NoBMP4_3	29.9854	19.1788	0.000558295
	Prdm16_OE +BMP4_1	34.3197	19.2476	2.90291e-05
	Prdm16_OE +BMP4_2	30.2496	15.1958	2.94018e-05
	Prdm16_OE +BMP4_3	33.9902	19.2344	3.61451e-05
	Prdm16_KO NoBMP4_1	29.1539	17.2915	0.000268583
	Prdm16_KO NoBMP4_2	31.6985	19.6796	0.000240957
	Prdm16_KO NoBMP4_3	32.346	20.5886	0.000288843
	Prdm16_KO +BMP4_1	32.5157	18.568	6.32886e-05
	Prdm16_KO +BMP4_2	32.0258	18.7484	0.000100715
	Prdm16_KO +BMP4_3	31.0329	18.1752	0.000134723
