# Supplementary material for: PRDM16 functions as a co-repressor in the BMP pathway to suppress neural stem cell proliferation
Source: eLife. 2025 Jul 14;14:RP104076. doi: 10.7554/eLife.104076 (PMC12259022; doi:10.7554/eLife.104076)
Supplement: Figure 3—figure supplement 1—source data 5. [file elife-104076-fig3-figsupp1-data5.xlsx]

## Sheet: Figure 3 Figure supplement 1K
	Samples	Cq (Nuf2)	Cq (18S)	2dCq
	Prdm16_OE NoBMP4_1	27.6417	17.5056	0.000888641
	Prdm16_OE NoBMP4_2	28.9513	18.6252	0.000778977
	Prdm16_OE NoBMP4_3	28.3287	19.1788	0.00176032
	Prdm16_OE +BMP4_1	32.3716	19.2476	0.000112018
	Prdm16_OE +BMP4_2	28.5099	15.1958	9.81936e-05
	Prdm16_OE +BMP4_3	31.7874	19.2344	0.000166403
	Prdm16_KO NoBMP4_1	27.1824	17.2915	0.0010533
	Prdm16_KO NoBMP4_2	29.5051	19.6796	0.00110208
	Prdm16_KO NoBMP4_3	30.1722	20.5886	0.0013033
	Prdm16_KO +BMP4_1	30.1816	18.568	0.000319126
	Prdm16_KO +BMP4_2	29.8051	18.7484	0.00046946
	Prdm16_KO +BMP4_3	29.0002	18.1752	0.000551225
