# Supplementary material for: PRDM16 functions as a co-repressor in the BMP pathway to suppress neural stem cell proliferation
Source: eLife. 2025 Jul 14;14:RP104076. doi: 10.7554/eLife.104076 (PMC12259022; doi:10.7554/eLife.104076)
Supplement: Figure 3—source data 1. [file elife-104076-fig3-data1.xlsx]

## Sheet: Figure 3F
	Samples	Cq (Wnt7b)	Cq (Cdkn1a)	Cq (18S)	2dCq (wnt7b-18S)	2dCq (Cdnk1a-18S)
	Prdm16_OE NoBMP4_1	28.3128	25.0279	17.5056	0.00543943	0.00543943
	Prdm16_OE NoBMP4_2	29.5499	26.2127	18.6252	0.0051994	0.0051994
	Prdm16_OE NoBMP4_3	29.361	26.0837	19.1788	0.00834449	0.00834449
	Prdm16_OE +BMP4_1	33.1984	27.506	19.2476	0.00326563	0.00326563
	Prdm16_OE +BMP4_2	30.2839	23.7334	15.1958	0.00269111	0.00269111
	Prdm16_OE +BMP4_3	33.1434	26.5117	19.2344	0.00644619	0.00644619
	Prdm16_KO NoBMP4_1	25.7739	25.1812	17.2915	0.00421652	0.00421652
	Prdm16_KO NoBMP4_2	28.3311	27.2752	19.6796	0.00517016	0.00517016
	Prdm16_KO NoBMP4_3	28.9551	28.0147	20.5886	0.00581486	0.00581486
	Prdm16_KO +BMP4_1	28.0704	26.9712	18.568	0.00295395	0.00295395
	Prdm16_KO +BMP4_2	27.9411	26.4655	18.7484	0.00475243	0.00475243
	Prdm16_KO +BMP4_3	27.0165	25.6197	18.1752	0.00574076	0.00574076
