# Supplementary material for: PRDM16 functions as a co-repressor in the BMP pathway to suppress neural stem cell proliferation
Source: eLife. 2025 Jul 14;14:RP104076. doi: 10.7554/eLife.104076 (PMC12259022; doi:10.7554/eLife.104076)
Supplement: Figure 4—figure supplement 1—source data 1. [file elife-104076-fig4-figsupp1-data1.xlsx]

## Sheet: Figure 4 Figure supplement 1D
Target	Sample	Cq Mean	DCq	normalized to Input	Note
Wnt7b	1% Input	24.1964	0	1
Wnt7b	IgGIgG	36.6537	-12.4573	0.000177818	second IgG IP after IgG in the first IP
Wnt7b	IgGSMAD4	33.9031	-9.70666	0.00119675	second Smad4 IP after IgG in the first IP
Wnt7b	IgG 2ndInput	35.5566	-11.3602	0.000380391	1% elute from the first IgG IP
Wnt7b	PRDM162ndInput	32.3256	-8.12922	0.00357158	1% elute from the first Prdm16 IP
Wnt7b	PRDM16IgG	30.9945	-6.7981	0.00898605	second IP after PRDM16 Ab in the first IP
Wnt7b	PRDM16SMAD4	29.4978	-5.30136	0.025359	second IP after PRDM16 Ab in the first IP
Id1	1% Input	24.3632	0	1
Id1	IgGIgG	35.3632	-11	0.000488284	second IgG IP after IgG in the first IP
Id1	IgGSMAD4	34.1579	-9.79474	0.00112587	second Smad4 IP after IgG in the first IP
Id1	IgG 2ndInput	36.538	-12.1748	0.000216278	1% elute from the first IgG IP
Id1	PRDM162ndInput	33.7383	-9.3751	0.00150596	1% elute from the first Prdm16 IP
Id1	PRDM16IgG	33.6801	-9.31688	0.00156798	second IP after PRDM16 Ab in the first IP
Id1	PRDM16SMAD4	31.6623	-7.29914	0.00634949	second IP after PRDM16 Ab in the first IP
Ins	1% Input	26.116	0	1
Ins	IgGIgG	38.9422	-12.8262	0.000137695	second IgG IP after IgG in the first IP
Ins	IgGSMAD4	35.649	-9.53304	0.0013498	second Smad4 IP after IgG in the first IP
Ins	IgG 2ndInput	40	-13.884	6.61454e-05	1% elute from the first IgG IP
Ins	PRDM162ndInput	36.6049	-10.4889	0.00069588	1% elute from the first Prdm16 IP
Ins	PRDM16IgG	35.3384	-9.22243	0.00167406	second IgG IP after PRDM16 Ab in the first IP
Ins	PRDM16SMAD4	36.5305	-10.4145	0.000732716	second Smad4 IP after PRDM16 Ab in the first IP
