# Supplementary material for: PRDM16 functions as a co-repressor in the BMP pathway to suppress neural stem cell proliferation
Source: eLife. 2025 Jul 14;14:RP104076. doi: 10.7554/eLife.104076 (PMC12259022; doi:10.7554/eLife.104076)
Supplement: Figure 4—source data 1. [file elife-104076-fig4-data1.xlsx]

## Sheet: Figure 4 source data 1F
Replicate 1
Target	Sample	Cq Mean	dCq	%input
Wnt7b ChIP	Prdm16_OE+BMP4 Input	30.4176	0	1
Wnt7b ChIP	Prdm16_OE+BMP4 IgG	32.0857	-1.66808	0.314672
Wnt7b ChIP	Prdm16_OE+BMP4 SMAD4	26.7928	3.62482	12.3361
Wnt7b ChIP	Prdm16 KO +BMP4 Input	29.4078	0	1
Wnt7b ChIP	Prdm16 KO +BMP4 IgG	31.1868	-1.779	0.291386
Wnt7b ChIP	Prdm16 KO +BMP4 SMAD4	26.7351	2.67267	6.37606
Replicate 2
Target	Sample	Cq Mean	dCq	%input
Wnt7b ChIP	Prdm16_OE+BMP4 Input	30.8527	0	1
Wnt7b ChIP	Prdm16_OE+BMP4 IgG	33.0685	-2.21581	0.215265
Wnt7b ChIP	Prdm16_OE+BMP4 SMAD4	27.0524	3.80032	13.9319
Wnt7b ChIP	Prdm16 KO +BMP4 Input	29.8318	0	1
Wnt7b ChIP	Prdm16 KO +BMP4 IgG	32.0299	-2.19812	0.217922
Wnt7b ChIP	Prdm16 KO +BMP4 SMAD4	26.9735	2.85821	7.25116
