# Supplementary material for: PRDM16 functions as a co-repressor in the BMP pathway to suppress neural stem cell proliferation
Source: eLife. 2025 Jul 14;14:RP104076. doi: 10.7554/eLife.104076 (PMC12259022; doi:10.7554/eLife.104076)
Supplement: Figure 4—source data 2. [file elife-104076-fig4-data2.xlsx]

## Sheet: Figure 4 source data 1G
Replicate 1
Target	Sample	Cq Mean	dCq	%input
Id1 ChIP	Prdm16_OE+BMP4 Input	31.5547	0	1
Id1 ChIP	Prdm16_OE+BMP4 IgG	33.4772	-1.9225	0.263797
Id1 ChIP	Prdm16_OE+BMP4 SMAD4	26.4771	5.07753	33.7668
Id1 ChIP	Prdm16 KO +BMP4 Input	30.5256	0	1
Id1 ChIP	Prdm16 KO +BMP4 IgG	33.0161	-2.49048	0.177947
Id1 ChIP	Prdm16 KO +BMP4 SMAD4	28.9041	1.62145	3.07685
Replicate 2
Target	Sample	Cq Mean	dCq	%input
Id1 ChIP	Prdm16_OE+BMP4 Input	31.821	0	1
Id1 ChIP	Prdm16_OE+BMP4 IgG	34.8602	-3.03924	0.121646
Id1 ChIP	Prdm16_OE+BMP4 SMAD4	26.4712	5.34974	40.7785
Id1 ChIP	Prdm16 KO +BMP4 Input	30.5886	0	1
Id1 ChIP	Prdm16 KO +BMP4 IgG	34.0325	-3.44389	0.0918934
Id1 ChIP	Prdm16 KO +BMP4 SMAD4	29.1719	1.41675	2.66983
