# Supplementary material for: PRDM16 functions as a co-repressor in the BMP pathway to suppress neural stem cell proliferation
Source: eLife. 2025 Jul 14;14:RP104076. doi: 10.7554/eLife.104076 (PMC12259022; doi:10.7554/eLife.104076)
Supplement: Figure 5—source data 1. [file elife-104076-fig5-data1.xlsx]

## Sheet: Figure 5F
replicate 1
Target	Sample	Cq Mean	DCq	normalized to Input
Id3 Ectopic	Prdm16_OE+BMP4 Input	30.6006	0	1
Id3 Ectopic	Prdm16_OE+BMP4 IgG	32.1116	-1.51104	0.350857
Id3 Ectopic	Prdm16_OE+BMP4 SMAD4	29.7338	0.866782	1.82359
Id3 Ectopic	Prdm16_OE+BMP4 c-FOS	31.1594	-0.558877	0.67883
Id3 Ectopic	Prdm16 KO +BMP4 Input	30.3001	0	1
Id3 Ectopic	Prdm16 KO +BMP4 IgG	32.6508	-2.35074	0.196045
Id3 Ectopic	Prdm16 KO +BMP4 SMAD4	29.0074	1.29269	2.44984
Id3 Ectopic	Prdm16 KO +BMP4 c-FOS	29.3862	0.913932	1.88417
replicate 2
Target	Sample	Cq Mean	DCq	normalized to Input
Id3 Ectopic	Prdm16_OE+BMP4 Input	30.665	0	1
Id3 Ectopic	Prdm16_OE+BMP4 IgG	33.1641	-2.4992	0.176875
Id3 Ectopic	Prdm16_OE+BMP4 SMAD4	29.049	1.61597	3.06517
Id3 Ectopic	Prdm16_OE+BMP4 c-FOS	30.8569	-0.191925	0.875437
Id3 Ectopic	Prdm16 KO +BMP4 Input	30.2373	0	1
Id3 Ectopic	Prdm16 KO +BMP4 IgG	32.4778	-2.24048	0.211616
Id3 Ectopic	Prdm16 KO +BMP4 SMAD4	28.6688	1.56851	2.96598
Id3 Ectopic	Prdm16 KO +BMP4 c-FOS	29.138	1.09934	2.14256
