# Supplementary material for: PRDM16 functions as a co-repressor in the BMP pathway to suppress neural stem cell proliferation
Source: eLife. 2025 Jul 14;14:RP104076. doi: 10.7554/eLife.104076 (PMC12259022; doi:10.7554/eLife.104076)
Supplement: Figure 5—source data 2. [file elife-104076-fig5-data2.xlsx]

## Sheet: Figure 5G
replicate 1
Target	Sample	Cq Mean	DCq	normalized to Input
Wnt7b Ectopic	Prdm16_OE+BMP4 Input	30.2163	0	1
Wnt7b Ectopic	Prdm16_OE+BMP4 IgG	31.8235	-1.60725	0.328222
Wnt7b Ectopic	Prdm16_OE+BMP4 SMAD4	29.1274	1.08883	2.12701
Wnt7b Ectopic	Prdm16_OE+BMP4 c-FOS	31.8559	-1.63962	0.32094
Wnt7b Ectopic	Prdm16 KO +BMP4 Input	29.9648	0	1
Wnt7b Ectopic	Prdm16 KO +BMP4 IgG	31.8739	-1.90915	0.26625
Wnt7b Ectopic	Prdm16 KO +BMP4 SMAD4	27.6051	2.35971	5.13265
Wnt7b Ectopic	Prdm16 KO +BMP4 c-FOS	29.2803	0.684477	1.60712
replicate 2
Target	Sample	Cq Mean	DCq	normalized to Input
Wnt7b Ectopic	Prdm16_OE+BMP4 Input	30.6094	0	1
Wnt7b Ectopic	Prdm16_OE+BMP4 IgG	32.8873	-2.27786	0.206203
Wnt7b Ectopic	Prdm16_OE+BMP4 SMAD4	29.2683	1.34109	2.53342
Wnt7b Ectopic	Prdm16_OE+BMP4 c-FOS	31.7211	-1.11167	0.462759
Wnt7b Ectopic	Prdm16 KO +BMP4 Input	29.7775	0	1
Wnt7b Ectopic	Prdm16 KO +BMP4 IgG	32.0507	-2.27315	0.206878
Wnt7b Ectopic	Prdm16 KO +BMP4 SMAD4	27.5655	2.21205	4.63332
Wnt7b Ectopic	Prdm16 KO +BMP4 c-FOS	29.241	0.536528	1.45048
