# Supplementary material for: PRDM16 functions as a co-repressor in the BMP pathway to suppress neural stem cell proliferation
Source: eLife. 2025 Jul 14;14:RP104076. doi: 10.7554/eLife.104076 (PMC12259022; doi:10.7554/eLife.104076)
Supplement: Figure 7—figure supplement 2—source data 1. [file elife-104076-fig7-figsupp2-data1.xlsx]

## Sheet: Figure 7 Figure supplement 2A
WT	Tissue annotation	Prdm16	Ttr	Foxj1	Sox2	Hes5	Ngn2	Zbtb20	Wnt2b	Wnt3a	Wnt5a	Wnt7b	Axin2	Lef1	Tcf3	Fzd9	Fzd10	Ctnnb1	Bmp4	Bmp7	Smad6	Smad7	Nog	mKi67	Cdkn1c	mut	Tissue annotation	Prdm16	Ttr	Foxj1	Sox2	Hes5	Ngn2	Zbtb20	Wnt2b	Wnt3a	Wnt5a	Wnt7b	Axin2	Lef1	Tcf3	Fzd9	Fzd10	Ctnnb1	Bmp4	Bmp7	Smad6	Smad7	Nog
1	CH	3	0	3	3	3	9	3	0	3	7	6	6	0	3	1	0	6	3	3	0	3	4	1	0	1	CH	0	0	25	11	11	12	4	12	8	18	11	11	1	17	3	18	17	4	4	4	0	4
2	CH	1	0	4	5	2	4	1	5	5	10	5	4	2	8	1	4	8	0	2	0	4	5	1	0	2	CH	0	0	13	6	14	18	2	11	5	6	7	9	3	9	0	3	13	2	5	0	0	6
3	CH	0	0	3	2	6	9	1	2	4	7	6	2	1	8	0	2	8	0	0	0	1	2	2	1	3	CH	0	0	2	8	8	16	3	4	6	17	3	9	4	12	0	7	4	2	4	0	2	6
4	CH	0	0	3	5	5	3	5	7	7	15	3	11	1	7	0	3	5	0	3	0	1	13	3	0	4	CH	0	0	8	12	5	4	1	13	11	4	15	8	0	13	0	3	11	0	3	4	0	9
5	CH	0	0	2	6	5	15	6	5	8	10	8	12	1	4	0	5	8	0	6	1	0	11	4	0	5	CH	0	0	6	1	16	12	4	10	11	14	6	10	0	11	1	6	9	1	4	0	0	5
6	CH	0	2	3	2	5	2	2	9	2	2	5	11	0	5	0	0	3	0	2	0	0	5	0	0	6	CH	0	0	3	5	7	14	3	3	7	7	5	5	1	7	0	3	5	1	3	3	3	3
7	CH	0	0	4	0	9	4	2	0	6	4	4	4	0	2	2	4	4	0	0	0	0	9	0	0	7	CH	0	0	2	6	5	3	3	9	8	8	5	2	3	10	0	4	6	3	4	0	0	10
8	CH	0	0	0	0	6	7	8	1	2	13	2	3	0	6	0	2	7	0	4	1	0	0	0	0	8	CH	0	0	4	10	10	10	6	7	6	7	12	11	0	6	0	5	5	0	2	2	0	4
9	CH	2	0	2	2	8	8	3	2	5	8	8	3	2	2	0	2	5	0	3	2	0	3	0	0	9	CH	0	0	7	2	4	2	5	5	5	2	2	8	2	5	0	2	2	0	0	0	0	4
10	CH	0	1	0	0	3	9	1	3	3	8	6	5	0	1	1	1	6	1	1	0	0	3	3	1	10	CH	0	0	7	6	14	7	0	6	6	3	6	13	2	7	0	14	7	3	6	3	0	10
11	CH	0	0	0	2	3	3	2	6	4	10	3	7	1	1	2	8	4	0	1	0	0	8	0	0	11	CH	0	0	0	0	3	1	2	1	0	5	0	3	0	1	0	0	2	0	1	0	0	0
12	CH	1	0	0	5	2	1	1	3	6	8	2	5	4	4	0	0	5	1	4	2	0	9	0	0	12	CH	0	0	0	5	7	11	0	13	3	9	13	5	2	11	0	5	6	0	2	5	0	6
13	CH	0	0	6	0	3	5	0	0	0	5	4	2	0	5	0	0	4	0	0	0	0	0	2	0	13	CH	0	0	15	5	5	9	3	9	3	1	3	5	3	3	1	5	5	0	3	0	0	3
14	CH	0	0	2	2	5	2	3	9	10	2	4	7	0	5	0	4	6	0	4	2	0	2	5	0	14	CH	0	0	2	2	3	6	5	9	2	3	5	5	2	8	0	6	5	2	5	2	0	2
15	CH	0	0	0	2	3	1	2	3	5	2	2	2	0	1	1	1	8	0	2	0	0	10	1	0	15	CH	0	0	0	4	3	8	4	4	4	1	4	5	0	8	0	1	1	0	1	1	0	3
16	CH	0	0	2	3	4	3	4	8	9	4	4	4	2	5	2	3	3	0	2	2	0	4	3	0	16	CH	0	0	0	2	6	2	2	8	6	7	7	6	1	6	0	6	1	0	4	0	0	6
17	CH	0	2	3	7	3	2	4	4	5	3	10	4	2	4	0	0	3	0	2	0	2	6	2	0	17	CH	0	0	0	4	3	3	2	13	6	7	7	9	0	6	0	4	3	7	5	0	0	5
18	CH	0	0	0	5	1	3	0	3	1	5	0	7	0	5	0	3	3	0	3	0	0	0	0	1	18	CH	0	0	0	3	3	3	2	3	3	3	3	4	0	7	2	2	3	0	3	2	0	3
19	CH	0	0	12	1	3	3	1	1	3	7	0	3	0	5	1	1	3	1	1	0	0	7	0	3	19	CH	0	0	2	2	4	7	1	19	6	4	6	7	0	15	1	6	7	4	5	0	1	2
20	CH	0	0	0	1	8	3	1	6	2	2	3	5	1	3	1	5	2	0	2	1	1	7	3	0	20	CH	0	0	4	5	20	5	5	16	12	6	9	13	2	7	0	5	6	3	3	0	0	17
21	CH	0	0	0	3	3	3	0	9	6	6	4	6	0	7	3	4	4	0	3	1	0	6	3	0	21	CH	0	0	9	0	3	3	2	1	1	0	3	2	1	4	0	1	3	0	0	0	0	4
22	CH	0	0	6	6	15	13	2	11	6	12	10	19	2	17	2	11	11	0	4	4	0	12	3	0	22	CH	0	0	8	5	5	4	4	7	5	0	5	8	1	8	0	3	7	0	0	0	0	4
23	CH	2	0	2	2	4	9	2	12	4	14	9	9	2	14	0	7	7	2	0	2	2	12	7	0	23	CH	0	0	0	4	10	14	0	7	3	3	3	14	2	10	0	4	10	0	3	2	3	4
24	CH	0	0	0	3	0	0	2	8	6	3	0	2	0	7	1	0	4	0	2	0	0	3	7	0	24	CH	0	0	0	2	2	17	2	2	7	4	4	7	0	10	0	5	4	0	0	2	0	4
25	CH	0	0	8	0	2	5	2	2	0	5	5	0	0	5	0	2	0	2	0	0	0	2	0	0	25	CH	0	0	2	5	10	5	2	0	2	0	10	4	0	10	2	4	7	2	2	2	0	4
26	CH	0	0	1	7	10	7	0	11	5	4	7	11	4	7	3	3	11	0	4	1	1	11	3	1	26	CH	0	0	2	6	4	7	3	4	3	0	11	5	0	13	0	4	4	2	4	3	0	2
27	CH	0	0	2	10	7	7	4	10	7	10	10	12	2	4	2	2	10	0	0	2	0	4	7	0	27	CH	0	0	3	0	1	3	1	3	1	3	1	3	0	3	0	7	1	3	3	0	0	1
28	CH	3	0	0	3	6	1	3	6	8	1	6	4	0	6	0	3	3	0	1	0	0	3	1	0	28	CH	0	0	0	3	2	0	2	7	5	3	4	9	2	4	0	2	4	0	15	0	2	7
29	CH	0	0	4	0	0	5	0	2	0	0	0	4	0	2	0	0	4	0	0	0	0	2	0	0	29	CH	0	0	2	0	0	2	2	4	2	0	4	4	2	4	0	2	5	2	0	0	0	2
30	CH	0	0	0	10	7	13	2	6	3	10	6	7	2	9	2	5	6	2	2	0	0	2	3	2	30	CH	0	0	6	4	6	15	6	8	4	4	2	19	2	12	2	12	8	0	2	0	0	10
31	CH	0	2	0	7	8	3	4	8	5	6	3	8	2	8	2	7	3	0	2	0	0	5	4	0	31	CH	0	0	0	4	7	13	2	4	2	6	7	9	4	7	2	4	6	4	2	2	2	6
32	CH	0	0	3	0	0	0	0	0	0	0	3	3	3	0	0	3	5	3	3	0	1	3	0	0	32	CH	0	0	2	0	2	6	0	2	2	4	2	4	2	2	0	0	4	2	2	0	2	2
33	CH	0	0	3	8	6	3	1	3	3	3	6	6	0	6	1	0	6	0	3	3	0	4	0	0	33	CH	0	0	12	7	2	6	4	6	1	3	6	9	2	9	0	2	6	0	9	0	0	1
34	CH	2	2	0	7	4	7	3	7	3	5	12	9	2	10	3	5	8	2	8	2	0	8	9	0	34	CH	0	0	1	1	4	3	2	3	2	2	4	13	0	7	0	3	8	3	2	1	0	3
35	CH	0	0	3	5	7	4	2	3	4	0	5	9	2	8	0	7	9	2	2	0	0	5	0	0	35	CH	0	0	2	4	4	27	3	6	5	6	8	10	3	8	0	4	6	3	2	2	0	4
36	CH	0	0	0	3	7	1	1	0	3	0	3	6	0	6	0	3	6	1	3	0	0	6	1	0	36	CH	0	0	2	0	0	16	5	2	0	3	2	5	2	3	0	2	4	0	4	0	0	2
37	CH	0	0	2	5	11	5	5	8	2	2	5	5	2	7	2	5	4	2	2	0	2	2	0	0	37	CH	0	0	7	3	0	11	2	0	0	3	2	2	0	7	0	2	3	0	5	0	0	2
38	CH	0	0	3	0	0	8	1	0	1	1	1	1	1	8	0	0	7	0	1	0	1	1	0	1	38	CH	0	0	6	9	6	13	1	10	5	3	3	8	0	5	0	6	3	1	5	1	0	1
39	CH	0	0	0	6	2	2	2	2	2	4	4	6	0	4	0	2	4	2	2	0	0	2	4	2	39	CH	0	0	3	3	2	5	1	6	9	3	5	16	0	10	1	8	1	3	1	2	0	5
40	CH	0	0	13	0	0	4	0	2	0	0	8	2	2	8	0	0	7	2	3	2	2	4	2	0	40	CH	0	0	5	8	8	23	5	8	8	7	6	15	0	10	1	5	8	3	3	3	2	15
41	CH	3	0	0	1	9	2	5	4	6	8	6	11	0	9	1	1	0	0	1	0	0	1	0	1	41	CH	0	0	6	2	9	12	11	5	8	13	11	9	5	15	0	9	9	2	8	2	0	6
42	CH	0	0	1	3	4	0	4	4	0	3	3	4	0	3	0	0	7	4	3	0	0	4	0	0	42	CH	0	0	5	10	11	13	5	5	5	4	5	13	2	4	2	7	11	2	4	0	0	7
43	CH	0	0	1	3	1	5	5	6	9	5	7	7	3	7	0	5	6	0	1	1	0	8	0	2	43	CH	0	0	0	5	4	4	4	5	5	4	2	9	0	6	0	5	0	0	2	0	0	2
44	CH	2	2	0	7	10	4	3	5	3	4	2	8	0	5	0	2	14	0	6	2	0	10	0	0	44	CH	0	0	3	0	10	9	3	12	11	18	10	12	8	14	0	4	9	3	6	3	0	8
45	CH	0	0	0	1	1	0	0	1	3	1	1	3	0	1	0	3	3	0	1	0	0	1	3	0	45	CH	0	0	0	2	3	8	5	2	5	2	9	5	0	6	0	5	6	0	3	2	0	3
46	CH	0	0	0	1	7	3	0	3	3	1	4	6	3	4	0	3	3	3	6	0	0	1	0	0	46	CH	0	0	3	7	17	11	3	4	4	4	4	10	4	4	0	7	4	3	4	1	0	4
47	CH	0	0	10	2	2	6	2	0	0	0	2	2	2	4	0	0	8	2	2	2	0	4	0	2	47	CH	0	0	3	0	2	20	2	3	0	4	2	7	3	9	0	2	4	0	0	0	0	2
48	CH	0	0	1	4	6	3	0	7	4	3	6	4	3	4	0	3	7	1	1	1	0	4	1	0	48	CH	0	0	1	5	9	5	1	6	4	0	2	5	0	9	0	2	5	1	0	1	0	0
49	CH	0	0	2	6	11	4	2	6	2	4	2	6	2	6	2	2	4	0	2	2	2	4	0	0	49	CH	0	0	0	2	2	0	2	2	2	2	2	2	2	0	0	0	4	2	2	0	0	2
50	CH	0	0	0	8	7	7	3	7	7	3	7	20	3	13	2	3	12	2	6	0	0	8	6	3	50	CH	0	0	6	14	26	17	10	18	7	6	25	21	2	21	0	9	14	2	11	2	0	13
51	CH	0	0	5	5	11	4	2	6	10	6	7	9	0	14	2	11	7	0	3	3	0	7	2	2	51	CH	0	0	3	7	9	6	3	13	7	10	13	12	3	9	1	9	9	3	3	1	0	6
52	CH	0	0	10	0	0	4	2	5	1	4	1	5	4	1	0	5	2	0	1	0	1	8	0	0	52	CH	0	0	0	3	6	8	1	3	1	3	1	8	1	3	0	3	8	1	3	0	0	3
53	CH	1	0	1	4	1	2	2	6	9	1	5	4	0	5	1	1	5	2	2	1	0	6	5	0	53	CH	0	0	2	6	12	14	4	11	10	6	6	8	2	14	0	4	3	3	3	3	0	6
54	CH	0	0	2	0	4	4	0	2	2	2	4	3	2	2	0	2	5	0	10	2	0	2	3	0	54	CH	0	0	1	3	1	10	0	1	1	0	1	4	0	3	0	1	0	0	3	0	0	1
55	CH	0	0	0	2	2	2	4	7	4	2	5	5	1	2	0	2	5	1	1	0	2	4	0	0	55	CH	0	0	9	4	1	10	1	4	1	0	5	6	0	1	0	4	5	0	2	0	0	1
56	CH	0	0	6	0	2	6	0	4	0	4	0	2	0	2	0	0	0	0	0	0	0	0	2	2	56	CH	0	0	0	4	4	6	2	4	4	2	6	11	0	4	2	6	4	0	8	2	0	4
57	CH	0	0	7	0	0	4	0	0	0	4	0	1	0	3	0	0	4	1	4	0	0	1	0	1	57	CH	0	0	9	3	5	9	3	7	7	5	7	11	3	13	0	3	5	1	5	3	0	1
58	CH	0	0	0	6	6	5	3	9	10	3	6	14	0	6	0	11	7	3	3	2	0	5	6	0	58	CH	0	0	2	5	2	5	2	2	2	0	4	2	2	2	0	4	0	2	4	0	0	5
59	CH	0	0	9	3	6	9	3	13	6	3	10	17	2	7	2	5	12	2	3	2	2	10	2	0	59	CH	0	0	6	9	4	9	3	9	3	6	7	18	1	6	0	6	6	2	9	2	0	4
60	CH	0	0	2	3	11	4	0	0	3	2	8	8	2	4	2	4	3	2	4	0	2	5	3	0	60	CH	0	0	5	10	8	6	2	14	5	4	16	10	2	10	1	12	8	1	2	2	1	4
61	CH	0	0	1	3	6	1	0	7	6	3	7	3	0	5	1	6	2	0	5	0	0	2	0	1	61	CH	0	0	10	1	1	19	1	0	0	0	0	4	1	3	0	0	1	0	0	0	0	0
62	CH	0	0	0	0	0	2	0	2	0	2	2	3	0	2	0	2	5	2	2	0	0	0	0	0	62	CH	0	0	1	2	9	2	3	3	2	1	9	8	2	3	0	6	5	2	2	0	0	6
63	CH	0	0	7	4	3	4	3	3	7	0	3	7	3	7	0	6	9	0	3	0	0	4	4	0	63	CH	0	0	3	8	3	5	6	17	5	6	12	21	3	15	2	7	11	2	7	0	0	7
64	CH	0	0	1	1	1	3	0	1	5	3	0	1	0	2	0	0	1	0	6	0	0	1	0	0	64	CH	0	0	4	2	6	4	0	4	0	2	6	6	2	4	2	2	2	2	4	0	2	4
65	CH	0	0	3	5	18	8	1	8	6	6	1	5	3	8	0	8	6	0	6	1	0	1	1	0	65	CH	0	0	1	8	11	8	3	13	1	6	8	8	3	6	0	8	9	0	8	0	0	1
66	CH	0	2	2	4	11	10	0	6	7	3	4	7	0	5	0	5	3	2	3	0	0	2	3	2	66	CH	0	0	1	4	15	9	6	7	6	6	15	17	0	15	1	12	4	1	6	3	0	3
67	CH	0	1	1	3	6	0	1	3	3	1	3	5	1	5	0	8	3	3	5	0	0	10	3	0	67	CH	0	0	3	3	9	5	3	5	5	3	5	12	0	5	0	9	7	0	3	1	0	5
68	CH	0	0	0	2	3	0	0	2	5	2	2	6	0	2	0	2	2	3	4	0	0	9	0	0	68	CH	0	0	5	1	10	2	4	0	1	5	1	5	0	1	0	6	4	0	4	1	0	1
69	CH	0	0	9	2	0	6	2	0	0	2	0	6	0	5	0	0	3	0	0	0	0	0	0	0	69	CH	0	0	0	2	3	14	4	4	4	3	2	8	2	9	0	5	2	2	3	0	0	3
70	CH	0	0	3	0	1	9	0	1	0	3	0	1	1	4	0	0	5	0	0	0	3	0	0	3	70	CH	0	0	0	2	0	4	2	3	4	4	5	4	0	4	0	2	3	0	6	2	0	4
71	CH	0	0	1	1	4	5	0	0	5	4	2	6	0	5	0	7	1	2	4	1	0	2	4	1	71	CH	0	0	0	4	8	5	2	4	0	4	9	15	4	12	2	6	11	2	0	0	0	7
72	CH	0	0	2	1	7	0	1	2	0	0	4	6	0	2	0	1	2	4	5	0	0	0	1	0	72	CH	0	0	3	4	3	6	2	7	6	2	4	11	3	7	0	7	7	3	7	0	0	2
73	CH	0	0	0	3	0	1	0	0	4	0	1	1	1	0	0	1	3	0	0	0	0	3	0	0	73	CH	0	0	1	4	5	4	3	4	5	1	7	8	0	5	1	1	4	4	4	0	1	4
74	CH	0	0	0	3	8	3	3	8	4	3	4	4	4	8	0	4	13	0	3	1	1	5	3	1	74	CH	0	0	3	6	4	4	3	11	7	4	10	7	3	7	2	4	11	3	3	2	0	7
75	CH	0	0	1	1	7	21	1	1	0	1	3	7	3	3	0	5	7	1	3	3	0	3	1	0	75	CH	0	2	5	3	6	13	4	3	5	5	2	16	2	9	0	8	5	2	5	0	0	6
76	CH	0	0	0	5	5	5	1	2	1	2	2	0	0	3	0	2	7	0	1	1	0	3	0	0	76	CH	0	0	2	6	8	20	0	0	3	8	5	14	0	11	0	5	6	1	7	0	1	3
77	CH	0	0	3	3	0	6	1	0	0	0	2	1	0	3	0	0	1	0	2	3	0	1	0	0	77	CH	0	0	2	2	2	2	4	0	2	0	4	4	4	10	0	2	6	4	2	0	0	4
78	CH	0	0	0	4	9	5	0	3	4	0	5	10	0	9	2	4	4	2	8	0	0	9	8	0	78	CH	0	0	1	4	1	8	5	1	5	9	4	5	0	9	1	0	5	0	1	0	0	5
79	CH	0	0	2	3	3	0	0	2	3	2	2	3	0	2	0	0	2	0	2	0	0	3	2	2	79	CH	0	0	2	2	4	2	4	2	4	0	4	9	0	2	0	2	7	2	2	2	0	2
80	CH	0	0	2	0	5	4	4	2	4	0	3	3	0	0	2	2	4	0	3	0	0	3	6	0	80	CH	0	0	0	4	5	2	3	4	4	2	3	6	0	5	0	4	4	3	2	2	0	4
81	CH	0	0	4	0	2	4	0	2	2	2	0	2	0	2	0	2	2	0	2	0	0	2	6	2	81	CH	0	0	4	5	2	8	2	0	3	2	6	12	0	7	2	5	3	4	6	3	2	0
82	CH	0	0	0	3	14	3	2	3	5	7	11	16	0	7	1	7	6	0	2	0	2	5	7	0	82	CH	0	0	2	3	2	9	6	2	0	0	6	6	2	3	0	5	8	2	6	0	0	0
83	CH	0	0	0	0	4	0	2	0	0	0	2	2	0	0	0	2	2	2	2	0	0	2	4	0	83	CH	0	0	2	6	9	9	2	3	6	2	5	10	0	11	0	7	2	2	3	2	0	2
84	CH	0	0	4	2	5	5	0	0	0	0	0	4	0	5	0	4	7	2	4	0	0	4	2	0	84	CH	0	0	2	9	22	4	3	3	7	10	8	9	0	10	0	10	12	3	3	0	0	7
85	CH	0	0	9	2	4	7	4	2	6	4	4	7	4	7	0	2	7	0	4	0	0	9	0	2	85	CH	0	0	1	3	1	16	0	3	6	6	2	11	0	4	1	3	8	4	3	1	1	5
86	CH	0	0	0	2	2	0	0	3	2	1	3	6	1	2	0	3	3	1	3	0	0	0	0	0	86	CH	0	0	1	6	8	3	0	3	5	0	5	6	1	3	0	5	5	3	3	0	0	1
87	CH	0	0	2	6	2	0	2	7	4	0	4	7	2	4	0	2	2	2	4	0	2	0	2	0	87	CH	0	0	6	1	10	6	0	1	5	4	17	18	1	16	2	11	7	1	4	1	0	6
88	CH	0	0	0	0	0	0	0	0	2	2	2	2	0	4	0	0	0	0	2	0	0	0	0	0	88	CH	0	0	2	8	19	10	4	7	5	5	13	10	4	16	2	2	13	4	7	2	0	5
89	CH	0	0	0	0	2	4	1	0	1	0	0	1	0	1	0	2	4	0	1	0	1	4	0	1	89	CH	0	0	0	6	6	5	0	5	0	2	6	8	0	6	0	5	6	4	4	0	0	5
90	CH	0	0	1	2	4	1	1	4	4	0	8	10	0	7	0	3	8	2	1	2	0	3	1	0	90	CH	0	0	5	1	6	5	2	4	2	6	4	7	2	7	0	6	1	1	4	1	0	5
91	CH	1	0	4	3	8	3	1	3	4	4	15	14	1	4	0	4	15	0	8	1	0	12	5	0	91	CH	0	0	0	6	8	21	2	2	6	4	8	12	4	14	2	4	10	6	6	0	2	4
92	CH	1	0	0	0	4	0	3	3	0	1	4	5	0	1	0	1	4	1	5	0	0	3	3	0	92	CH	0	0	1	5	9	7	2	3	5	1	3	12	3	11	0	7	9	5	7	1	0	2
93	CH	0	0	1	1	0	1	0	2	5	2	0	2	0	0	0	0	4	1	5	0	0	1	0	0	93	CH	0	0	3	3	5	5	1	3	5	0	1	6	3	8	0	3	1	0	1	1	0	6
94	CH	0	0	5	3	8	2	0	12	10	7	8	10	0	10	0	7	4	2	7	3	0	6	4	0	94	CH	0	0	12	1	1	12	2	1	2	2	8	8	1	5	0	1	3	5	2	3	0	3
95	CH	0	0	3	2	3	3	0	3	10	7	3	7	0	7	3	3	2	2	6	2	2	2	2	0	95	CH	0	0	0	2	7	9	0	1	0	1	0	2	2	5	0	1	0	1	3	0	1	2
96	CH	0	0	2	2	4	2	0	4	2	5	5	12	0	4	2	4	7	2	2	0	0	4	2	0	96	CH	0	0	0	3	3	5	0	3	8	0	5	10	1	5	0	5	5	1	3	0	0	5
97	CH	2	2	5	2	8	3	3	3	3	3	5	5	0	3	0	3	3	2	4	0	0	5	4	2	97	CH	0	0	2	2	15	6	2	2	2	5	5	16	2	10	0	5	10	0	6	2	0	2
98	CH	0	0	0	2	9	0	3	3	5	0	2	2	0	8	0	13	5	0	1	0	0	5	0	0	98	CH	0	0	0	2	12	2	2	2	2	2	0	6	2	2	0	3	0	2	2	2	0	3
99	CH	0	0	15	0	2	7	2	2	2	2	2	7	0	4	0	2	7	2	5	2	0	2	0	0	99	CH	0	0	3	5	1	12	5	1	3	10	3	10	0	10	1	3	5	1	3	1	1	5
100	CH	0	0	3	7	0	3	1	5	3	1	0	3	0	5	0	5	3	0	9	0	0	3	1	0	100	CH	0	0	1	1	0	6	1	3	5	6	0	3	1	5	0	3	3	0	3	0	0	3
101	CH	0	2	0	3	2	14	0	2	0	5	2	2	2	6	0	3	3	3	2	0	2	3	5	2	101	CH	0	0	0	0	1	0	1	3	5	5	3	5	0	0	0	3	3	1	3	0	0	1
102	CH	0	0	9	2	3	4	2	0	0	2	7	10	2	3	0	4	9	3	4	2	0	3	0	0	102	CH	0	0	2	3	15	3	3	3	5	6	8	12	7	13	0	7	6	3	6	5	2	3
103	CH	0	0	4	4	6	0	1	2	5	4	0	8	1	5	0	1	2	1	8	1	1	2	4	0	103	CH	0	0	0	1	2	2	2	4	5	4	8	14	0	6	0	0	6	2	5	1	2	6
104	CH	0	0	6	4	6	3	1	2	1	1	3	14	0	9	0	5	5	0	4	2	0	1	5	1	104	CH	0	0	2	7	16	6	2	4	2	4	12	17	2	7	0	6	7	6	6	2	2	4
105	CH	0	0	4	7	4	1	4	4	4	4	3	4	0	4	0	6	6	4	7	0	0	4	4	0	105	CH	0	0	3	4	4	0	0	4	3	0	4	7	1	7	0	4	3	0	5	0	0	1
106	CH	0	0	8	0	1	10	1	3	1	0	1	0	0	5	0	0	3	5	3	3	0	0	0	0	106	CH	0	0	0	0	2	2	0	3	5	0	5	3	0	2	0	2	3	0	2	0	0	3
107	CH	0	0	0	2	2	1	1	0	0	0	5	0	0	0	0	1	2	1	10	0	0	1	3	0	107	CH	0	0	4	7	5	4	3	3	4	0	4	4	3	4	0	6	4	3	4	0	0	4
108	CH	0	0	1	2	0	5	2	0	2	1	2	8	0	5	1	3	2	1	8	2	0	5	2	0	108	CH	0	0	9	0	5	17	2	1	0	1	1	5	1	4	0	4	8	0	2	0	0	2
109	CH	0	1	3	0	0	1	0	0	4	0	1	1	0	8	0	4	5	1	8	1	1	4	0	1	109	CH	0	0	5	3	7	12	3	3	3	3	9	11	3	7	1	3	7	5	7	1	0	3
110	CH	0	2	0	2	2	0	0	0	9	0	0	7	0	7	0	3	7	3	5	0	2	4	8	0	110	CH	0	0	6	1	8	11	0	3	3	0	6	3	1	3	0	3	3	1	4	0	0	3
111	CH	2	0	2	12	6	10	6	4	8	6	6	6	2	4	4	0	4	4	4	0	0	13	6	0	111	CH	0	0	22	0	0	13	3	2	0	14	9	4	3	3	0	0	7	2	3	0	0	8
112	CH	0	0	4	12	7	1	1	7	3	6	3	3	3	4	0	1	4	0	3	0	0	9	4	0	112	CH	0	0	13	5	1	10	1	10	0	9	7	2	1	5	0	4	6	1	5	2	1	3
113	CH	0	0	1	12	5	22	8	12	11	16	9	11	5	20	3	3	11	3	4	4	1	15	4	0	113	CH	0	0	15	1	0	9	1	1	0	6	7	2	0	4	1	0	4	1	5	1	0	5
114	CH	0	0	1	10	6	11	5	12	2	5	5	6	0	6	1	0	5	0	4	0	0	4	0	0	114	CH	0	0	10	4	4	11	9	8	8	18	3	12	3	5	0	2	11	2	10	2	1	7
115	CH	0	0	2	7	15	7	8	2	2	6	6	9	6	14	0	2	10	0	3	2	3	4	5	0	115	CH	0	0	0	4	2	19	5	3	3	4	3	4	2	5	0	2	5	0	0	0	0	4
116	CH	0	0	1	8	7	9	3	5	0	13	8	3	1	8	0	1	5	0	2	0	0	9	2	0	116	CH	0	0	11	2	0	2	2	0	0	0	5	0	2	2	0	0	6	0	2	0	0	5
117	CH	0	1	4	3	0	5	4	0	1	7	11	1	3	3	3	0	3	1	4	0	0	7	0	0	117	CH	0	0	3	13	11	7	5	9	5	11	7	13	1	13	0	5	5	0	1	1	1	5
118	CH	0	0	1	7	8	5	3	11	5	7	5	4	1	18	7	4	7	0	7	1	0	1	4	0	118	CH	0	0	4	8	6	0	2	10	10	6	6	6	2	8	2	4	4	0	4	2	0	4
119	CH	0	0	3	4	5	8	4	6	5	15	6	13	4	7	3	5	4	0	5	0	0	11	6	0	119	CH	0	0	3	2	6	3	3	7	4	7	3	7	0	4	2	3	3	2	2	3	0	12
120	CH	0	0	0	9	12	0	12	9	1	5	5	10	5	12	1	0	10	1	3	3	0	3	9	0	120	CH	0	0	17	1	0	6	1	1	5	2	12	6	2	5	0	4	5	0	4	0	0	2
121	CH	0	0	3	5	7	18	14	7	1	9	5	14	5	14	3	1	7	3	5	3	0	5	9	1	121	CH	0	0	4	11	4	7	8	7	3	21	11	9	5	9	3	3	11	2	3	2	2	4
122	CH	0	0	0	3	5	17	1	5	7	3	5	1	3	5	0	5	11	3	5	1	0	3	3	0	122	CH	0	0	4	2	2	10	0	0	0	2	4	0	0	4	0	2	4	0	0	0	0	0
123	CH	1	0	0	5	6	5	4	5	2	9	6	6	4	9	3	0	4	2	5	0	0	5	5	0	123	CH	0	0	15	5	3	15	5	1	0	7	5	1	0	7	0	0	9	1	3	0	1	5
124	CH	0	0	5	13	4	5	2	9	6	10	5	5	0	9	1	0	4	1	6	0	0	6	5	1	124	CH	0	0	0	9	5	3	5	5	1	1	5	1	0	3	1	0	3	0	5	0	0	0
125	CH	0	0	0	5	2	20	6	2	2	13	2	6	5	5	0	2	9	2	9	2	0	6	6	2	125	CH	0	0	5	3	5	7	3	5	1	11	3	5	3	3	0	0	5	0	5	3	0	3
126	CH	0	0	0	7	9	17	5	6	2	14	3	1	3	12	2	1	5	2	4	2	0	5	7	0	126	CH	0	0	1	7	1	16	1	0	0	5	3	0	1	3	0	0	3	0	3	0	0	5
127	CH	0	0	0	10	1	11	1	4	3	11	7	5	1	7	1	0	10	0	4	0	1	11	1	0	127	CH	0	0	4	9	3	24	4	4	4	10	10	7	3	9	1	3	4	4	3	0	0	7
128	CH	0	0	0	6	0	4	0	7	1	7	5	5	0	1	1	2	0	1	0	0	0	1	4	0	128	CH	0	0	6	6	2	0	0	11	3	3	5	6	2	3	2	2	10	0	5	0	0	2
129	CH	0	0	2	7	2	11	2	5	0	10	5	4	0	4	0	2	2	0	2	2	0	2	2	0	129	CH	0	0	0	5	3	12	3	1	3	5	9	9	0	5	1	3	3	3	5	0	0	5
130	CH	0	0	6	4	6	9	2	15	9	9	9	6	2	2	2	0	0	2	6	2	0	2	6	0	130	CH	0	0	7	0	0	4	2	4	0	2	2	2	0	4	0	0	2	0	0	0	0	2
131	CH	0	0	0	2	4	7	0	7	2	4	2	4	5	5	0	0	4	0	4	0	0	4	0	0	131	CH	0	0	9	5	3	9	1	3	3	3	3	1	0	5	0	3	3	0	1	0	0	3
132	CH	0	0	0	11	7	17	3	9	1	7	7	7	3	5	0	0	3	0	5	3	0	0	0	0	132	CH	0	0	8	3	1	10	0	0	0	6	5	3	3	10	0	0	12	0	8	0	0	3
133	CH	1	0	4	10	4	4	1	14	3	7	3	3	1	4	1	1	3	0	4	0	0	3	1	1	133	CH	0	0	2	5	3	2	3	8	2	3	3	4	4	2	0	4	2	0	2	0	3	4
134	CH	0	0	3	12	7	7	3	12	9	11	7	3	3	5	0	0	3	1	5	1	0	3	0	0	134	CH	0	0	1	2	2	3	5	6	3	3	11	7	0	3	1	8	5	0	1	1	0	0
135	CH	2	0	5	13	11	8	2	13	5	14	4	2	2	11	0	2	5	0	5	2	0	5	2	0	135	CH	0	0	14	0	0	8	3	2	0	0	0	3	1	4	0	2	7	0	0	1	0	1
136	CH	0	0	1	15	8	13	5	15	1	8	5	10	0	15	1	1	10	3	5	0	0	8	3	0	136	CH	0	0	0	3	9	24	4	4	3	8	4	4	2	6	2	2	8	0	3	3	0	7
137	CH	0	0	11	9	5	27	7	9	3	14	14	11	3	23	0	1	14	1	1	3	0	3	9	1	137	CH	0	0	4	1	1	5	0	1	0	0	0	2	1	4	0	0	4	0	2	0	0	4
138	CH	0	0	0	8	9	8	11	18	3	14	8	3	2	11	2	2	6	5	2	2	2	5	5	0	138	CH	0	0	3	3	0	1	5	5	0	3	0	3	1	5	0	0	5	3	5	0	0	5
139	CH	0	0	2	6	6	7	6	13	5	14	2	6	3	10	2	0	5	2	0	0	0	9	5	0	139	CH	0	0	0	5	7	9	2	2	2	4	2	7	0	2	2	0	2	0	4	2	0	2
140	CH	0	0	2	3	4	4	6	12	4	10	3	4	3	6	2	0	4	2	4	2	0	5	2	0	140	CH	0	0	1	9	3	5	0	7	3	7	3	5	2	3	0	3	4	2	2	0	0	10
141	CH	0	0	16	8	3	3	0	12	3	0	8	3	2	13	0	3	6	2	2	2	0	5	0	0	141	CH	0	0	3	12	6	5	6	12	5	10	12	11	4	14	3	0	6	3	4	0	0	9
142	CH	2	0	0	6	3	7	5	7	6	7	3	2	2	6	0	3	7	0	2	0	0	6	3	0	142	CH	0	0	1	10	3	3	3	11	8	6	8	11	0	1	0	8	3	3	10	3	0	11
143	CH	3	0	0	12	3	7	5	21	5	9	5	7	0	10	1	1	5	0	5	1	0	7	5	0	143	CH	0	0	11	1	0	8	0	2	1	1	11	3	3	3	0	1	3	0	5	0	0	3
144	CH	0	0	3	5	5	22	5	8	5	17	5	12	1	12	0	0	8	0	3	0	0	3	5	1	144	CH	0	0	20	5	3	13	0	4	4	2	6	9	2	9	0	4	12	4	2	4	0	7
145	CH	0	0	7	10	10	18	7	10	5	7	13	16	2	10	2	2	10	2	5	0	2	2	13	4	145	CH	0	0	2	3	4	2	0	6	2	10	2	9	2	9	0	3	3	1	0	0	1	2
146	CH	0	0	0	9	3	2	2	10	2	7	2	5	0	7	0	2	2	0	2	3	0	7	2	0	146	CH	0	0	2	8	4	3	4	8	5	7	10	10	2	8	0	5	8	0	4	0	0	5
147	CH	2	0	2	8	8	6	2	15	4	4	4	4	2	6	0	2	6	4	4	0	0	4	4	0	147	CH	0	0	4	7	4	4	1	4	1	4	8	5	1	4	0	1	4	0	1	0	0	4
148	CH	4	0	0	8	10	12	4	18	6	12	10	12	4	12	0	2	4	6	6	2	0	4	10	0	148	CH	0	0	0	5	4	2	4	5	5	0	5	13	0	6	2	7	4	0	3	0	0	3
149	CH	0	0	0	6	4	7	1	14	4	6	1	8	4	5	1	2	4	0	1	1	1	4	0	0	149	CH	0	0	2	5	5	4	3	10	3	8	6	4	2	4	0	0	4	0	4	0	0	4
150	CH	0	0	3	8	6	3	3	15	3	10	3	8	0	7	2	3	3	2	7	0	0	3	2	0	150	CH	0	0	8	0	1	5	3	0	0	0	6	5	3	6	0	0	5	0	3	0	0	5
151	CH	0	0	0	7	12	10	1	3	3	5	1	10	1	5	0	5	3	1	1	0	1	3	3	0	151	CH	0	0	2	0	4	2	5	9	5	9	2	9	0	9	0	1	5	0	5	0	0	5
152	CH	1	0	2	9	4	5	4	26	6	10	4	10	1	4	2	1	4	1	6	0	0	6	5	0	152	CH	0	0	7	5	10	5	2	10	5	5	4	13	2	8	2	5	7	2	2	2	0	2
153	CH	0	0	5	12	8	12	13	8	6	16	12	8	8	13	2	0	8	0	5	1	1	4	10	1	153	CH	0	0	2	7	6	4	6	9	8	8	11	13	2	8	3	6	8	3	3	2	0	3
154	CH	2	0	2	15	4	5	4	22	7	14	9	14	2	7	0	2	4	2	5	2	2	2	2	0	154	CH	0	0	2	5	4	2	2	9	2	2	5	10	0	4	2	0	4	0	0	2	0	4
155	CH	0	0	0	5	5	7	12	10	1	14	5	5	1	12	3	3	1	1	0	1	1	5	0	0	155	CH	0	0	3	5	5	9	3	9	5	7	7	9	1	9	3	1	3	0	3	0	0	3
156	CH	2	0	13	8	7	16	4	16	10	4	14	5	2	6	0	3	2	3	3	0	0	6	0	2	156	CH	0	0	6	3	6	8	3	5	5	3	3	8	0	6	0	6	3	0	3	0	0	6
157	CH	0	0	0	7	12	18	4	18	7	15	7	7	1	7	0	1	7	0	4	0	0	3	0	0	157	CH	0	0	1	2	0	5	1	7	0	1	3	2	5	7	0	1	2	0	1	0	0	3
158	CH	2	0	2	15	14	2	5	25	11	12	10	11	0	13	1	1	3	0	6	0	1	8	7	0	158	CH	0	0	3	0	0	6	1	0	0	1	1	1	0	2	0	0	3	0	1	0	0	0
159	CH	2	0	2	7	22	17	9	17	4	17	11	12	4	12	2	2	7	0	4	0	2	6	4	0	159	CH	0	0	11	0	0	17	3	0	1	5	3	7	1	4	0	0	7	0	0	0	0	4
160	CH	0	0	0	8	1	4	5	12	8	12	5	16	0	4	4	4	5	0	4	4	0	5	4	0	160	CH	0	0	1	6	1	4	5	2	4	4	2	11	1	5	0	1	2	1	2	0	1	2
161	CH	0	0	2	11	2	2	3	15	2	6	10	14	2	6	0	3	2	3	2	2	0	5	2	0	161	CH	0	0	5	3	0	10	6	6	7	5	4	5	0	9	1	4	11	1	5	0	3	5
162	CH	0	0	9	5	0	19	2	5	1	3	2	5	0	9	0	0	12	0	3	0	0	2	2	0	162	CH	0	0	0	4	0	0	2	4	2	0	2	2	0	2	0	0	2	0	2	0	0	4
163	CH	0	0	4	10	9	9	2	15	5	10	6	10	6	15	2	0	15	1	2	0	0	6	2	0	163	CH	0	0	2	3	2	2	3	9	5	2	5	3	0	5	0	0	3	2	2	0	0	2
164	CH	0	0	2	9	9	5	10	23	10	9	6	10	0	15	0	5	6	3	5	2	0	2	6	0	164	CH	0	0	4	0	0	4	1	0	0	0	0	4	1	0	0	3	4	0	3	0	0	1
165	CH	0	0	2	7	4	0	5	13	5	5	7	10	2	5	2	4	4	5	5	0	0	5	2	0	165	CH	0	0	1	7	6	9	1	7	7	7	6	15	3	12	1	6	3	1	6	4	1	3
166	CH	0	0	3	7	3	8	2	20	3	11	3	4	0	8	2	4	7	2	2	2	0	3	3	0	166	CH	0	0	0	2	5	2	2	7	2	0	8	8	0	0	0	0	2	0	2	0	0	2
167	CH	3	0	3	12	15	6	6	14	5	9	4	12	2	4	0	2	4	4	5	2	2	5	4	0	167	CH	0	0	1	5	0	0	1	3	3	0	8	5	1	3	3	1	0	0	3	0	0	5
168	CH	0	0	6	8	12	8	6	12	4	12	8	10	2	6	2	6	6	0	6	4	2	6	0	0	168	CH	0	0	0	5	11	1	5	5	7	3	9	7	1	5	0	9	5	0	7	3	0	5
169	CH	3	0	5	22	15	12	5	34	3	14	22	27	6	33	3	8	20	5	8	2	0	8	8	0	169	CH	0	0	0	2	4	7	1	4	1	4	2	3	2	5	0	1	2	0	5	0	0	7
170	CH	1	0	4	6	4	1	3	17	2	9	6	5	2	10	0	2	4	1	3	0	0	3	1	0	170	CH	0	0	1	4	3	4	1	4	1	5	8	4	0	3	0	1	4	1	3	0	0	5
171	CH	0	0	0	5	6	8	5	9	9	8	5	4	5	5	1	0	4	0	5	1	0	4	0	1	171	CH	0	0	2	6	9	2	0	9	6	7	11	11	2	6	2	6	6	0	6	0	0	2
172	CH	0	0	17	13	11	19	4	22	5	13	10	15	3	19	0	4	7	3	12	2	0	4	2	2	172	CH	0	0	2	2	4	10	2	3	5	5	4	4	0	6	0	0	5	0	2	0	0	3
173	CH	6	0	2	11	16	10	9	21	8	8	8	15	2	11	0	4	4	2	2	4	0	12	6	0	173	CH	0	0	5	5	15	9	2	9	5	5	6	13	0	8	2	5	6	2	8	0	0	6
174	CH	0	0	0	18	7	0	2	17	5	11	10	9	1	15	3	2	4	1	5	0	0	1	10	0	174	CH	0	0	3	3	16	3	5	11	1	13	11	10	1	10	0	3	8	3	8	0	1	11
175	CH	0	0	0	8	14	5	3	16	5	9	6	11	1	9	0	0	3	0	8	0	1	6	6	0	175	CH	0	0	10	5	3	11	0	0	3	4	2	9	2	11	0	4	5	0	3	0	0	2
176	CH	0	0	3	8	4	7	6	19	5	18	5	10	2	13	0	8	12	0	6	2	3	5	4	0	176	CH	0	0	4	3	2	4	0	8	5	2	4	8	1	4	0	11	3	3	6	0	0	8
177	CH	0	0	1	13	19	3	11	21	13	11	9	15	1	17	0	1	5	0	9	1	0	5	5	0	177	CH	0	0	1	1	1	3	4	3	3	4	3	6	3	6	1	1	3	0	3	0	0	6
178	CH	0	0	1	11	9	17	5	21	3	9	5	13	2	10	0	5	11	1	7	2	2	7	5	0	178	CH	0	0	18	0	2	10	2	0	0	2	2	4	2	14	2	0	8	0	6	2	0	4
179	CH	0	0	3	15	8	4	3	27	8	11	7	14	2	11	0	0	11	2	1	3	1	5	12	0	179	CH	0	0	5	8	9	13	3	6	11	9	9	11	3	3	3	0	8	0	3	0	1	6
180	CH	2	0	2	10	10	6	5	30	8	9	17	15	2	11	2	4	3	4	6	2	0	8	4	2	180	CH	0	0	0	6	5	5	0	7	4	4	5	7	2	6	0	5	6	3	6	0	0	5
181	CH	0	0	2	11	9	8	3	17	4	4	6	8	2	4	0	3	5	3	3	2	0	3	5	0	181	CH	0	0	5	9	9	5	2	6	6	9	7	12	2	9	2	7	10	2	9	2	2	2
182	CH	3	0	1	8	8	18	0	18	5	5	8	3	0	15	1	5	5	3	8	0	3	8	3	1	182	CH	0	0	12	4	0	4	2	2	4	3	3	9	0	6	2	6	4	2	0	0	0	4
183	CH	0	0	2	6	4	5	0	15	5	10	3	11	2	9	0	6	3	2	2	0	0	7	12	2	183	CH	0	0	5	8	8	30	3	5	1	3	6	17	3	24	0	15	10	1	6	3	1	3
184	CH	2	0	2	10	20	6	2	19	9	3	3	19	2	12	0	5	2	6	9	2	0	12	6	0	184	CH	0	0	1	6	2	12	1	5	1	1	10	9	1	16	1	1	8	0	3	3	0	0
185	CH	0	0	4	4	7	16	4	8	5	7	5	13	2	11	0	2	2	2	7	0	0	4	2	0	185	CH	0	0	3	1	0	9	0	1	0	1	5	5	1	5	0	3	3	0	3	3	0	1
186	CH	0	0	2	10	10	11	3	26	6	10	11	15	3	11	0	0	4	3	7	3	0	7	7	2	186	CH	0	0	3	7	11	17	1	9	7	3	15	25	5	15	1	11	9	1	7	1	1	3
187	CH	0	0	0	6	8	2	0	10	1	5	5	5	1	8	1	2	9	0	13	0	0	6	1	0	187	CH	0	0	0	2	4	13	1	1	0	5	1	3	1	3	0	1	2	0	2	1	0	4
188	CH	0	0	0	11	19	7	2	17	1	17	11	12	2	12	2	3	5	1	13	1	0	7	3	0	188	CH	0	0	5	10	6	10	4	10	4	6	8	22	3	16	2	6	6	4	4	3	0	10
189	CH	0	0	3	9	9	29	5	41	3	16	12	11	2	12	0	2	12	2	5	2	0	5	5	0	189	CH	0	0	0	0	3	5	3	3	3	4	0	7	0	4	0	3	3	0	2	0	0	2
190	CH	0	0	2	9	4	4	0	6	2	2	2	9	0	2	0	2	4	0	4	0	0	7	0	0	190	CH	0	0	3	4	6	0	2	5	4	4	6	8	0	3	0	2	6	3	7	0	0	4
191	CH	0	0	0	6	3	23	6	7	2	11	3	5	0	12	1	3	4	0	6	1	1	5	1	1	191	CH	0	0	4	0	2	8	2	0	2	4	5	5	2	5	0	0	5	2	5	0	0	7
192	CH	0	0	2	6	5	9	2	11	9	11	8	15	5	11	2	2	5	2	6	2	0	5	2	0	192	CH	0	0	0	0	3	1	1	9	4	1	4	5	0	2	0	1	3	1	3	1	0	2
193	CH	0	0	2	5	4	7	3	14	7	2	5	12	2	12	0	3	9	3	3	3	0	4	5	0	193	CH	0	0	0	4	1	1	2	6	1	5	11	0	0	4	0	4	4	0	6	0	0	4
194	CH	1	0	0	3	5	3	1	8	1	3	8	7	0	8	0	3	3	0	2	0	0	6	1	0	194	CH	0	0	2	5	5	4	3	8	8	4	13	12	2	5	0	3	5	0	4	4	0	7
195	CH	0	0	1	11	13	6	0	13	7	4	1	11	3	6	0	6	7	3	10	1	0	4	6	0	195	CH	0	0	9	2	2	26	3	0	3	3	5	5	0	11	0	3	13	2	6	0	0	5
196	CH	1	0	1	10	15	24	6	18	7	13	3	27	3	12	0	6	18	4	6	1	1	7	9	0	196	CH	0	0	0	6	6	4	2	5	5	4	5	11	0	4	3	5	5	2	4	4	2	4
197	CH	0	0	4	15	8	15	5	18	2	11	5	13	2	16	0	2	5	2	5	2	0	2	10	0	197	CH	0	0	2	5	5	5	2	2	8	1	5	19	0	6	0	5	4	1	9	1	0	4
198	CH	0	0	0	2	9	11	0	6	0	2	6	4	0	4	2	2	4	2	4	0	0	2	0	0	198	CH	0	0	0	8	5	1	3	10	8	6	17	19	2	18	2	8	9	2	6	5	0	7
199	CH	0	0	5	8	4	2	2	4	4	2	5	5	0	7	0	2	5	0	4	2	0	0	5	0	199	CH	0	0	10	12	25	8	4	2	10	6	18	33	4	20	2	12	8	6	23	0	0	14
200	CH	0	0	1	4	8	6	1	13	1	1	4	8	0	4	1	3	10	4	8	1	0	4	4	0	200	CH	0	0	0	8	6	4	4	10	6	5	11	21	0	15	0	4	4	2	3	2	0	5
201	CH	0	0	3	5	8	11	3	14	6	6	4	10	2	4	0	2	4	4	11	2	0	2	4	0	201	CH	0	0	0	4	5	7	4	4	2	4	10	15	0	7	0	2	7	2	4	2	0	5
202	CH	0	0	1	4	2	6	2	2	1	5	0	8	0	5	0	1	4	2	9	0	0	0	5	0	202	CH	0	0	5	7	8	14	5	3	7	0	10	12	3	7	1	8	8	1	8	0	0	5
203	CH	2	0	2	6	10	12	2	21	4	4	6	8	4	12	0	2	8	4	4	2	0	8	10	0	203	CH	0	0	0	0	7	3	3	6	4	4	4	10	3	2	2	6	3	3	7	0	2	7
204	CH	0	0	0	9	11	11	3	9	7	1	3	5	1	7	1	5	3	1	3	0	0	5	7	0	204	CH	0	0	2	6	17	8	5	8	2	0	9	22	3	9	0	10	9	2	10	2	2	7
205	CH	0	0	0	7	7	11	0	5	1	6	0	3	1	4	0	3	0	0	4	0	2	0	3	0	205	CH	0	0	19	3	3	6	3	1	1	3	3	8	3	9	0	3	8	0	6	1	0	4
206	CH	2	0	2	8	30	11	3	10	0	15	15	27	4	19	0	6	10	4	14	2	0	3	21	2	206	CH	0	0	2	3	4	16	3	3	3	3	7	12	3	6	2	7	7	0	7	0	0	7
207	CH	0	0	0	9	10	2	0	9	2	3	2	12	2	4	0	6	0	0	4	0	0	4	3	0	207	CH	0	0	1	6	8	6	0	6	4	6	10	23	1	11	0	10	6	5	16	6	0	5
208	CH	0	0	3	4	3	12	3	5	3	5	3	6	2	5	0	3	2	5	5	0	0	0	5	0	208	CH	0	0	1	7	4	3	0	3	1	0	4	12	0	3	0	1	3	3	12	0	0	4
209	CH	2	0	0	4	6	3	3	7	0	4	2	7	0	4	0	3	3	2	6	0	0	4	0	0	209	CH	0	0	7	3	1	5	3	5	3	1	5	15	3	3	1	7	8	5	12	1	0	5
210	CH	0	0	2	5	12	8	0	3	2	6	8	8	0	9	2	2	2	2	10	2	2	3	8	0	210	CH	0	0	4	6	11	6	5	0	1	6	6	17	5	17	1	7	8	6	11	2	1	5
211	CH	0	0	3	3	2	18	3	3	0	1	2	2	3	4	0	3	2	1	8	1	0	3	2	0	211	CH	0	0	0	2	6	10	0	6	6	2	10	10	2	13	0	9	9	2	5	0	3	3
212	CH	0	0	3	6	4	11	1	3	3	3	4	6	1	11	0	3	4	1	6	0	0	6	0	0	212	CH	0	0	1	4	10	5	0	5	6	0	9	19	4	6	0	11	10	2	11	2	0	5
213	CH	0	0	1	6	6	0	0	13	3	3	3	8	0	6	0	5	3	0	1	0	0	3	3	0	213	CH	0	0	0	7	9	9	2	2	7	4	9	7	0	12	0	4	9	4	7	0	0	4
214	CH	0	0	1	3	8	5	1	11	3	2	5	5	0	8	0	2	6	1	8	1	0	2	2	0	214	CH	0	0	2	4	20	3	4	2	0	3	17	24	2	18	2	7	10	7	9	0	0	4
215	CH	1	0	4	12	7	7	1	11	4	2	8	15	0	6	0	7	7	3	13	0	2	2	2	0	215	CH	0	0	0	2	6	1	0	1	4	2	9	10	1	9	0	5	10	2	16	3	0	8
216	CH	2	0	2	2	3	6	2	3	5	2	3	8	0	3	0	3	5	0	2	0	0	2	2	0	216	CH	0	0	2	5	8	4	0	5	4	0	7	4	2	7	2	0	5	2	10	0	2	2
217	CH	0	0	1	7	4	3	1	16	4	7	4	4	1	6	1	4	0	0	4	1	0	1	3	0	217	CH	0	0	2	7	4	3	0	4	6	0	3	13	2	6	0	3	3	4	16	2	0	4
218	CH	0	2	4	8	8	8	3	4	4	2	5	12	2	11	0	5	10	3	8	2	2	3	5	2	218	CH	0	0	0	6	4	12	1	1	3	4	3	10	0	10	1	10	3	5	7	0	1	6
219	CH	0	0	6	4	6	7	2	6	3	4	6	15	0	10	0	6	3	4	7	3	0	3	2	0	219	CH	0	0	7	7	13	29	1	0	2	4	13	19	5	18	1	4	13	10	12	1	0	11
220	CH	3	0	0	7	7	0	0	9	0	5	5	11	0	5	0	1	5	1	11	1	0	0	7	0	220	CH	0	0	3	8	11	3	3	1	6	3	4	9	0	3	0	1	3	0	9	0	0	9
221	CH	0	0	3	10	0	16	7	2	1	20	3	11	5	16	2	3	13	2	5	4	1	6	9	0	221	CH	0	0	5	6	4	14	5	1	4	6	2	8	2	5	1	1	4	0	2	1	0	13
222	CH	0	0	0	5	4	20	10	5	0	9	8	9	7	9	3	3	9	0	4	0	3	9	8	0	222	CH	0	0	0	5	6	6	3	0	5	6	3	6	5	10	0	1	6	0	5	0	0	5
223	CH	0	0	2	8	12	28	4	2	2	5	5	9	11	15	4	3	9	0	5	2	2	8	16	2	223	CH	0	0	0	5	4	13	7	6	8	13	11	3	3	8	2	0	12	0	11	2	0	6
224	CH	0	0	2	15	13	15	13	6	9	24	17	17	6	18	2	2	14	5	7	4	2	9	16	0	224	CH	0	0	0	5	2	14	2	0	2	5	5	2	2	5	0	0	8	2	2	2	0	5
225	CH	0	0	4	8	0	10	8	5	8	8	5	8	2	10	2	2	4	2	2	2	0	4	5	0	225	CH	0	0	0	6	5	9	0	8	5	6	3	2	2	7	2	3	4	5	4	0	2	6
226	CH	2	0	0	3	5	11	12	4	7	10	5	5	5	13	0	8	5	3	12	2	0	13	7	2	226	CH	0	0	1	9	6	38	2	7	8	19	9	6	6	13	0	1	7	0	11	2	1	12
227	CH	0	0	3	6	3	13	8	0	4	7	3	6	5	11	2	3	2	0	4	0	0	8	8	0	227	CH	0	0	3	12	8	15	6	8	8	24	18	23	7	20	1	8	8	1	11	1	2	14
228	CH	0	0	1	17	9	17	11	1	8	9	6	12	12	15	6	0	9	0	3	3	0	12	3	0	228	CH	0	0	3	6	6	6	9	4	3	7	12	8	4	13	2	6	10	2	0	2	0	9
229	CH	0	0	4	2	4	10	8	2	8	8	4	4	2	6	0	0	0	2	6	4	2	8	4	2	229	CH	0	0	3	6	11	6	4	3	2	7	2	5	3	9	2	2	5	2	3	0	2	8
230	CH	1	0	1	4	4	4	5	0	1	9	2	5	2	10	0	0	6	2	0	0	0	9	2	0	230	CH	0	0	1	9	7	8	2	8	12	15	10	4	2	8	1	1	4	0	7	2	0	13
231	CH	0	0	0	8	5	16	12	0	4	7	4	7	5	13	2	0	8	0	2	2	0	7	4	2	231	CH	0	0	3	4	8	3	2	2	4	10	7	5	4	7	2	2	8	0	5	2	2	8
232	CH	0	0	3	4	7	12	3	0	3	13	2	8	3	8	3	0	5	2	3	2	2	12	2	0	232	CH	0	0	0	5	3	20	1	3	1	7	5	5	3	7	0	5	3	1	5	0	3	7
233	CH	0	0	4	13	8	16	6	2	2	9	9	11	4	6	2	0	9	2	6	2	2	11	2	0	233	CH	0	0	7	11	7	9	7	6	11	12	7	6	2	7	2	6	7	2	7	2	0	11
234	CH	0	0	4	11	4	11	8	4	7	12	7	7	7	12	1	0	10	0	7	4	0	8	5	0	234	CH	0	0	1	6	3	9	6	0	9	6	6	9	1	3	1	3	3	0	9	1	0	9
235	CH	0	0	2	10	2	14	8	0	2	12	8	12	8	20	0	0	16	2	6	2	2	12	12	0	235	CH	0	0	2	9	9	9	9	4	12	16	12	9	4	22	4	7	12	0	11	2	2	14
236	CH	0	0	2	7	0	4	2	4	2	10	2	4	4	7	0	0	4	2	4	2	0	4	2	0	236	CH	0	0	3	9	8	12	3	0	3	12	3	9	7	11	3	0	8	0	0	2	0	11
237	CH	0	0	2	9	1	7	4	1	3	0	4	3	3	3	1	0	1	0	4	1	0	5	3	0	237	CH	0	0	1	0	0	0	0	0	0	0	0	0	0	0	0	0	1	0	0	0	0	1
238	CH	0	0	0	3	4	8	4	0	0	7	2	3	4	7	2	0	8	2	0	0	0	5	4	0	238	CH	0	0	3	13	10	40	4	7	4	25	12	12	0	16	1	7	10	3	10	3	4	13
239	CH	0	0	7	5	5	4	3	1	1	4	3	3	0	14	0	0	7	0	3	0	0	4	1	0	239	CH	0	0	0	9	9	2	5	9	6	7	17	6	2	9	0	2	2	0	6	0	2	6
240	CH	0	0	0	6	4	9	7	0	2	6	2	2	4	9	0	0	4	0	4	2	2	4	4	0	240	CH	0	0	16	1	2	2	2	1	0	5	12	2	3	10	0	2	7	0	2	0	0	5
241	CH	0	0	10	3	2	4	3	0	0	9	5	3	2	9	0	0	3	0	2	0	2	2	3	0	241	CH	0	0	6	3	7	3	3	0	3	2	7	4	4	11	2	0	6	0	3	4	2	11
242	CH	0	0	0	4	1	17	9	6	4	4	3	4	3	6	0	0	6	1	6	3	0	9	3	0	242	CH	0	0	1	6	5	15	4	2	2	13	9	5	2	5	1	5	9	1	6	1	2	5
243	CH	0	0	2	10	12	33	10	5	4	12	4	12	7	12	0	0	4	2	2	0	0	4	5	2	243	CH	0	0	0	3	3	10	0	4	2	2	5	4	2	4	0	0	4	2	2	0	2	6
244	CH	0	0	15	0	0	4	2	3	0	8	8	2	0	10	0	0	3	0	3	2	0	6	2	0	244	CH	0	0	4	1	0	1	2	0	0	5	1	0	0	2	0	0	1	0	0	0	0	2
245	CH	0	0	4	5	5	11	7	4	10	10	7	4	4	11	0	0	8	0	2	0	2	7	5	2	245	CH	0	0	2	2	7	17	6	9	6	24	6	6	3	10	2	2	8	1	9	1	0	16
246	CH	2	0	2	11	4	7	4	6	4	4	7	4	2	6	2	0	4	2	4	2	2	9	0	2	246	CH	0	0	0	8	4	5	5	11	5	13	5	5	2	8	4	5	4	0	2	0	0	2
247	CH	0	0	0	9	9	10	5	3	5	7	12	5	3	16	3	0	14	0	3	1	1	5	0	1	247	CH	0	0	1	3	3	10	1	0	1	8	0	1	0	5	1	0	3	0	3	0	0	3
248	CH	0	0	0	1	3	3	4	5	4	4	3	3	3	5	0	0	3	1	2	0	0	1	2	1	248	CH	0	0	3	3	6	5	1	7	5	4	9	5	2	10	0	2	12	0	6	0	0	7
249	CH	0	0	0	0	0	7	0	0	0	1	1	7	7	3	0	0	5	0	0	0	0	1	8	0	249	CH	0	0	2	7	9	6	7	7	4	4	6	6	0	9	2	2	4	0	4	0	0	9
250	CH	0	0	8	2	2	4	2	0	0	7	8	2	4	7	0	0	5	0	2	0	2	4	0	0	250	CH	0	0	1	7	1	1	5	8	6	16	6	10	1	10	0	8	7	1	3	1	3	14
251	CH	0	0	4	2	0	4	2	0	2	2	4	0	0	2	0	2	6	0	2	0	2	4	0	0	251	CH	0	0	1	4	3	9	2	0	3	1	1	2	1	2	0	1	3	0	0	0	0	3
252	CH	0	0	1	18	12	12	10	14	12	14	7	10	3	12	1	1	9	1	3	0	0	3	15	0	252	CH	0	0	3	3	8	8	3	0	0	3	5	3	5	5	0	0	3	0	3	1	0	8
253	CH	2	0	0	7	3	7	6	7	14	10	6	6	5	10	3	2	7	0	6	5	0	7	2	2	253	CH	0	0	7	10	17	19	4	14	10	17	8	22	2	16	2	7	14	5	5	2	2	17
254	CH	0	0	0	1	1	5	0	0	0	0	0	1	6	3	0	0	3	1	1	0	0	0	0	0	254	CH	0	0	0	10	7	8	2	10	5	7	8	10	2	5	0	5	0	0	4	0	0	10
255	CH	0	0	0	7	14	13	7	5	5	16	7	5	2	8	3	3	14	2	4	2	0	9	2	3	255	CH	0	0	5	1	2	11	2	0	1	0	5	5	8	9	2	0	5	1	0	1	0	14
256	CH	0	0	2	2	2	4	2	0	2	2	6	4	2	4	2	0	8	0	2	0	0	6	0	2	256	CH	0	0	3	3	0	0	1	0	6	3	0	3	0	3	0	0	0	0	0	1	0	3
257	CH	0	0	8	3	2	13	3	5	5	5	0	5	0	9	0	2	5	0	3	0	2	8	0	2	257	CH	0	0	5	10	17	7	5	10	3	9	8	12	6	9	1	6	7	2	5	3	0	15
258	CH	0	0	1	3	5	10	10	3	5	11	5	5	3	5	3	0	5	1	1	0	1	8	0	0	258	CH	0	0	3	12	4	12	7	4	4	11	9	3	3	10	0	2	5	0	4	2	0	11
259	CH	0	0	1	4	5	13	4	8	11	14	7	4	1	8	3	0	7	4	4	0	0	7	0	1	259	CH	0	0	9	18	20	12	11	11	7	14	15	17	4	17	1	7	15	0	7	6	3	17
260	CH	0	0	9	0	0	7	2	2	1	6	8	2	0	6	0	1	13	0	3	0	0	5	0	0	260	CH	0	0	18	18	11	20	7	11	11	17	11	18	1	13	0	3	11	3	5	5	5	13
261	CH	0	0	1	13	9	20	13	5	3	14	7	7	1	7	3	2	6	5	3	2	0	7	1	0	261	CH	0	0	2	4	6	2	3	4	0	7	4	3	0	3	0	0	4	0	4	2	0	4
262	CH	3	0	1	6	3	11	4	8	6	9	6	3	0	4	1	0	4	0	6	0	0	6	1	0	262	CH	0	0	2	3	11	9	3	3	6	6	8	3	3	4	3	0	8	3	3	0	0	8
263	CH	1	0	1	13	8	9	9	5	8	22	6	6	5	17	5	0	5	0	9	4	1	10	5	0	263	CH	0	0	2	7	4	17	7	9	4	14	10	6	0	10	1	0	14	0	6	1	0	16
264	CH	0	0	4	9	5	4	9	14	2	20	9	9	2	12	3	5	9	2	8	0	5	5	10	0	264	CH	0	0	6	3	7	3	3	11	7	7	7	4	3	8	3	2	3	2	3	3	0	11
265	CH	0	0	0	2	9	6	5	3	7	12	7	7	1	5	0	1	6	1	2	0	0	9	0	0	265	CH	0	0	0	4	2	9	4	2	5	2	5	4	0	10	0	0	4	3	3	0	0	8
266	CH	0	0	8	0	0	4	4	0	0	4	2	2	0	4	0	0	4	0	2	0	2	4	0	0	266	CH	0	0	7	0	2	3	6	6	2	2	5	6	2	2	0	7	2	2	2	0	0	10
267	CH	1	1	25	5	3	27	3	9	5	11	7	7	0	11	1	3	11	0	5	1	3	9	3	5	267	CH	0	0	5	13	23	11	11	23	5	19	11	33	4	20	1	5	22	5	7	5	1	18
268	CH	0	0	3	17	1	4	4	17	11	7	4	7	4	10	1	0	4	0	6	0	1	10	3	0	268	CH	0	0	3	8	23	9	3	13	11	11	9	7	3	22	3	12	8	0	8	3	0	11
269	CH	0	0	11	2	0	21	11	5	4	18	6	9	0	9	4	2	5	0	4	3	0	8	3	7	269	CH	0	0	2	9	13	9	0	13	5	9	4	14	0	8	2	1	5	1	2	0	0	5
270	CH	2	0	2	9	3	12	13	9	4	12	7	8	2	10	0	2	6	3	7	0	3	10	2	0	270	CH	0	0	0	7	7	2	2	5	7	7	5	2	2	2	2	7	5	4	2	0	0	7
271	CH	0	0	0	11	5	5	5	6	8	8	3	3	3	8	0	1	10	3	3	0	1	5	0	0	271	CH	0	0	9	14	9	10	5	10	10	11	5	10	5	5	4	1	13	1	0	1	1	9
272	CH	0	0	22	0	0	13	3	4	1	9	9	6	3	6	0	0	12	1	4	0	0	7	0	0	272	CH	0	0	4	7	0	16	3	7	4	9	9	5	0	5	0	4	3	0	2	1	1	6
273	CH	2	0	3	6	0	9	6	4	8	4	4	9	4	8	2	4	6	2	4	3	2	0	3	0	273	CH	0	0	0	1	2	3	2	1	0	0	1	1	0	1	0	4	0	0	0	0	0	4
274	CH	0	1	4	15	14	9	9	14	12	16	16	16	6	26	4	6	10	0	7	4	2	9	1	0	274	CH	0	0	3	6	9	9	4	15	6	9	6	7	1	10	0	3	10	0	6	1	1	13
275	CH	0	0	12	3	0	4	3	7	0	4	11	3	1	8	0	0	9	0	1	0	0	0	0	1	275	CH	0	0	2	7	6	4	2	9	6	11	7	6	3	9	0	6	5	0	2	2	0	9
276	CH	0	0	5	7	4	4	7	15	17	13	17	12	2	15	2	2	13	2	7	2	4	15	4	0	276	CH	0	0	1	4	10	6	3	4	3	5	4	2	2	4	0	4	5	0	6	1	0	5
277	CH	2	0	2	23	2	7	9	31	18	24	9	15	8	18	2	4	9	2	2	3	1	3	0	0	277	CH	0	0	11	6	22	23	2	4	10	11	6	11	2	10	0	8	5	1	4	1	0	6
278	CH	2	0	0	14	6	8	10	19	7	19	14	10	2	10	0	3	11	2	8	0	2	14	12	0	278	CH	0	0	5	10	13	15	7	2	7	10	8	18	2	21	0	19	16	2	5	0	2	7
279	CH	2	0	8	0	0	4	4	2	2	6	6	2	0	14	0	0	10	4	2	0	0	4	0	0	279	CH	0	0	9	12	13	13	4	13	5	18	12	13	0	13	5	9	7	3	2	2	0	8
280	CH	0	0	2	15	11	5	14	10	3	8	8	19	2	14	1	2	11	6	0	1	2	10	8	0	280	CH	0	0	1	5	6	6	3	6	6	9	6	6	1	6	3	3	6	0	8	0	1	6
281	CH	1	0	20	0	1	8	7	0	0	6	11	4	0	11	0	0	10	0	8	3	0	4	0	1	281	CH	0	0	2	5	12	11	2	7	6	6	4	10	5	8	0	12	7	0	3	2	0	13
282	CH	0	0	3	10	4	4	8	15	1	8	10	3	1	12	4	1	4	1	7	3	0	7	3	0	282	CH	0	0	14	3	2	9	4	2	6	3	5	2	0	5	0	3	4	0	11	0	2	6
283	CH	0	0	9	5	10	16	12	27	8	17	14	8	1	15	3	1	8	3	5	0	1	11	2	4	283	CH	0	0	10	11	8	10	6	6	6	11	8	4	0	13	0	2	8	0	2	2	0	6
284	CH	0	0	2	7	0	5	5	15	10	5	3	10	0	9	0	5	8	3	7	3	0	7	0	0	284	CH	0	0	8	12	9	3	10	5	4	11	9	13	0	11	1	15	12	3	6	1	1	5
285	CH	0	0	2	7	1	1	4	3	3	7	3	4	4	7	1	0	9	0	3	1	1	3	0	0	285	CH	0	0	3	7	3	5	2	10	5	14	10	9	3	9	0	13	8	0	7	3	0	5
286	CH	0	0	7	0	0	0	0	3	0	3	0	0	2	3	0	0	3	2	3	0	0	7	0	0	286	CH	0	0	3	6	8	3	2	8	6	6	9	11	2	6	2	8	6	0	5	0	0	12
287	CH	0	0	2	15	10	17	8	19	10	14	14	7	0	28	2	3	20	2	5	2	3	11	9	0	287	CH	0	0	3	3	6	3	3	3	6	11	14	11	2	12	0	3	7	0	2	0	0	11
288	CH	1	0	0	6	9	12	4	11	9	12	6	9	3	9	3	1	12	1	4	1	0	6	1	3	288	CH	0	0	4	4	7	4	0	1	4	7	4	3	1	6	1	0	3	0	4	3	1	7
289	CH	0	0	24	3	0	9	3	3	0	7	9	1	0	3	0	3	10	0	6	0	0	3	0	3	289	CH	0	0	10	6	25	7	10	7	6	6	10	23	1	15	0	9	10	7	6	1	0	11
290	CH	0	0	11	9	6	8	6	8	6	6	6	6	3	14	3	3	8	0	3	0	0	6	3	0	290	CH	0	0	4	9	25	3	2	5	8	6	12	8	0	11	0	5	13	0	11	0	0	4
291	CH	0	0	3	12	3	5	4	13	6	7	11	5	1	4	1	2	10	0	2	1	1	6	0	0	291	CH	0	0	6	2	1	7	2	3	6	4	2	3	0	4	0	3	4	0	8	0	0	9
292	CH	0	0	1	9	4	6	4	12	8	14	6	17	4	8	1	0	10	0	6	2	0	5	4	0	292	CH	0	0	11	3	2	8	4	0	0	5	7	2	0	0	0	2	5	0	0	0	0	9
293	CH	0	0	0	9	8	2	4	11	6	14	3	4	3	7	0	2	5	0	2	2	0	4	4	0	293	CH	0	0	6	6	21	20	3	7	10	7	12	13	2	7	2	7	6	2	5	2	0	7
294	CH	0	0	15	3	0	5	2	2	0	3	3	2	0	5	0	0	5	0	6	0	0	5	0	4	294	CH	0	0	22	3	3	20	5	4	5	14	5	8	3	10	3	4	9	3	8	0	3	8
295	CH	0	0	0	13	2	7	4	9	5	5	9	4	0	5	2	0	6	0	3	2	0	4	4	0	295	CH	0	0	4	5	12	8	2	7	6	5	18	7	1	10	0	8	9	0	4	0	0	10
296	CH	2	0	0	4	2	5	4	8	7	4	4	11	0	5	0	2	5	2	5	5	0	4	5	0	296	CH	0	0	4	8	17	32	5	6	7	11	11	12	4	19	3	3	12	4	8	0	3	12
297	CH	0	0	10	10	7	7	0	12	10	5	4	7	2	10	0	0	10	0	7	0	0	2	0	4	297	CH	0	0	0	3	18	15	3	3	3	5	9	15	2	10	0	7	8	0	8	0	0	8
298	CH	0	0	7	5	3	5	1	5	0	3	3	5	0	3	0	0	9	3	1	0	1	1	0	1	298	CH	0	0	8	2	4	31	4	2	2	4	2	6	0	8	0	4	6	2	2	0	2	10
299	CH	0	0	2	6	6	4	2	8	4	6	4	8	2	6	0	4	8	2	6	0	0	8	0	0	299	CH	0	0	2	7	8	4	2	4	11	4	9	14	2	9	2	11	12	3	6	2	0	4
300	CH	0	0	0	4	6	23	14	8	3	11	7	6	3	8	0	3	7	2	3	0	0	9	7	2	300	CH	0	0	14	4	3	10	0	0	0	8	1	1	1	8	0	1	10	0	1	0	0	7
301	CH	0	0	8	7	5	15	7	7	11	8	7	5	0	3	1	2	2	1	6	0	0	10	8	0	301	CH	0	0	2	3	6	7	2	4	7	0	6	4	0	7	0	6	2	3	6	0	0	6
302	CH	0	0	2	6	0	7	3	11	2	4	4	7	2	8	2	3	6	0	3	0	0	2	2	0	302	CH	0	0	1	6	13	18	3	3	5	13	3	6	0	10	0	6	6	0	3	1	0	6
303	CH	0	0	2	2	0	0	0	6	2	4	2	2	0	2	0	2	4	2	4	2	0	2	0	2	303	CH	0	0	4	4	2	4	2	7	8	4	9	10	2	7	0	9	6	1	3	0	0	3
304	CH	0	0	2	4	2	2	2	12	7	2	2	4	0	5	0	0	2	2	2	2	0	2	0	2	304	CH	0	0	4	7	11	7	1	4	8	4	8	15	1	3	0	5	4	1	7	0	0	8
305	CH	0	0	0	5	3	18	6	6	3	21	3	6	3	11	1	0	8	0	3	1	0	5	5	1	305	CH	0	0	2	2	9	6	3	3	6	6	7	17	0	7	2	10	2	2	7	0	0	10
306	CH	0	0	8	3	0	11	0	4	0	5	10	1	1	15	0	1	14	0	7	0	0	5	3	0	306	CH	0	0	6	6	6	18	2	1	3	4	5	14	1	7	0	4	6	5	5	1	0	10
307	CH	1	0	4	9	9	12	6	17	17	20	8	8	5	9	2	1	5	1	8	1	0	18	2	0	307	CH	0	0	0	8	26	13	5	7	24	15	15	16	4	12	0	10	12	2	15	2	2	12
308	CH	0	0	0	15	4	3	6	12	6	13	0	9	3	4	1	3	9	1	6	1	0	12	3	0	308	CH	0	0	27	3	3	18	6	0	2	3	3	12	0	9	0	3	8	0	7	2	0	11
309	CH	0	0	4	6	1	0	4	6	1	13	4	4	0	3	1	3	4	1	11	0	1	9	3	1	309	CH	0	0	14	9	11	6	1	11	4	0	12	17	0	9	1	8	9	8	4	1	0	9
310	CH	0	0	1	6	5	9	5	13	5	10	9	9	5	13	1	2	8	5	8	1	0	4	4	0	310	CH	0	0	4	9	9	17	2	5	10	4	7	10	2	5	0	7	7	2	7	2	0	9
311	CH	1	0	10	6	0	11	2	4	2	2	4	2	0	7	0	0	5	1	2	0	0	5	0	0	311	CH	0	0	5	11	7	27	3	7	9	7	19	27	0	15	1	7	9	0	19	0	1	11
312	CH	3	0	1	10	13	5	8	20	8	12	10	17	3	17	1	3	13	8	5	5	1	8	7	0	312	CH	0	0	1	3	4	5	3	10	13	4	11	14	1	9	1	7	4	2	4	2	1	7
313	CH	0	0	12	4	4	7	7	5	0	11	7	7	0	14	0	1	17	0	5	3	3	8	0	1	313	CH	0	0	6	3	11	17	3	3	3	3	9	14	3	8	0	4	11	0	3	0	0	10
314	CH	1	0	1	10	5	5	1	13	9	13	9	9	5	9	1	5	12	1	5	2	0	8	5	1	314	CH	0	0	6	4	11	9	2	0	4	6	9	6	2	9	0	7	4	2	11	2	0	13
315	CH	0	0	2	12	14	5	4	20	13	16	6	20	7	9	2	8	12	5	12	4	0	6	6	2	315	CH	0	0	2	9	6	10	3	2	8	3	8	15	1	15	0	7	8	2	12	1	1	10
316	CH	4	0	2	8	8	3	5	15	15	7	6	14	2	11	3	6	9	2	6	0	2	6	2	0	316	CH	0	0	1	3	9	1	1	9	5	3	9	13	3	15	1	7	13	1	7	1	0	5
317	CH	1	0	0	8	12	4	4	12	12	24	8	18	2	10	0	2	8	4	4	1	0	6	4	0	317	CH	0	0	5	0	4	12	3	0	1	4	1	4	0	8	1	0	5	0	4	0	0	4
318	CH	0	0	3	4	3	8	4	4	4	4	1	4	0	4	0	5	5	0	10	0	0	4	1	0	318	CH	0	0	1	4	4	8	9	5	1	2	8	13	2	9	0	5	4	0	6	2	0	5
319	CH	2	0	5	15	6	15	5	19	6	23	8	16	6	19	2	2	16	2	8	2	2	9	13	2	319	CH	0	0	14	2	5	14	2	2	0	0	0	5	0	11	2	0	10	0	2	0	0	2
320	CH	3	0	0	7	13	27	1	15	9	9	3	13	3	9	1	3	3	1	5	0	1	11	7	1	320	CH	0	0	3	5	11	11	2	5	8	6	19	22	0	22	0	11	13	5	12	4	0	15
321	CH	2	0	12	12	6	26	6	7	4	6	6	8	1	16	0	1	7	6	6	1	0	7	0	4	321	CH	0	0	9	12	14	19	3	9	6	2	10	28	2	10	2	9	9	5	11	2	0	12
322	CH	0	0	11	7	5	21	0	5	3	5	3	5	0	7	0	1	15	3	7	1	1	5	3	1	322	CH	0	0	18	0	2	20	2	4	2	6	2	6	2	13	0	2	11	0	2	0	0	4
323	CH	0	0	5	8	11	18	1	13	3	5	3	18	0	5	3	3	10	3	5	1	0	3	5	0	323	CH	0	0	0	2	12	11	2	7	1	0	7	18	1	14	2	14	8	1	6	0	0	2
324	CH	1	0	11	7	2	7	0	6	11	6	5	10	4	6	0	4	8	1	4	0	0	11	2	2	324	CH	0	0	3	7	3	6	3	1	7	3	4	25	3	12	0	10	10	4	6	0	0	6
325	CH	0	0	2	22	9	14	3	14	15	17	2	30	2	26	0	6	10	0	9	2	6	10	10	0	325	CH	0	0	1	3	10	12	5	8	8	8	7	15	1	19	0	15	12	1	7	0	0	8
326	CH	0	0	6	3	2	4	2	5	2	4	4	5	0	12	0	2	9	0	8	0	0	6	0	2	326	CH	0	0	3	8	5	13	2	15	8	5	16	22	3	16	2	14	10	0	11	2	0	11
327	CH	0	0	4	9	7	2	4	10	11	8	4	7	3	12	2	0	5	2	6	3	0	8	7	2	327	CH	0	0	9	8	13	18	2	9	6	6	9	11	2	27	2	11	20	4	13	0	2	8
328	CH	0	2	4	19	20	14	5	30	19	17	9	29	4	14	0	4	22	5	19	2	0	9	10	0	328	CH	0	0	2	5	11	5	2	2	4	2	7	10	0	5	0	11	8	5	8	2	0	8
329	CH	0	0	0	5	6	8	6	11	5	13	10	10	4	9	1	11	5	5	11	1	1	9	5	0	329	CH	0	0	3	18	25	21	2	4	8	4	11	26	2	18	0	17	8	4	11	2	0	16
330	CH	3	0	3	9	3	12	4	4	7	8	7	15	2	15	0	3	9	3	8	0	2	3	3	0	330	CH	0	0	5	5	11	5	3	3	5	1	15	16	1	18	1	8	10	5	10	1	0	10
331	ChP	1	2	1	5	2	2	0	0	3	0	0	10	0	2	0	1	6	0	8	0	0	7	1	1	331	ChP	0	0	0	3	10	4	0	1	3	3	7	11	1	4	0	7	4	3	7	4	0	4
332	ChP	0	0	2	2	0	2	2	4	4	2	0	7	0	2	0	2	2	0	6	0	0	4	2	0	332	ChP	0	0	1	1	7	8	2	1	0	2	6	11	1	9	0	3	1	1	9	0	0	1
333	ChP	0	0	0	2	0	0	3	0	2	0	2	7	0	9	0	2	5	2	2	0	0	2	4	0	333	ChP	0	0	3	7	10	4	3	3	4	2	5	10	2	3	0	5	4	4	9	2	0	7
334	ChP	0	4	1	2	4	4	1	2	13	0	2	13	1	12	0	2	12	5	26	0	1	5	5	0	334	ChP	0	0	2	2	6	2	0	2	2	2	5	8	2	8	0	5	3	3	3	0	0	0
335	ChP	0	4	2	2	0	0	2	0	2	0	0	5	2	7	0	5	7	2	10	0	2	7	10	0	335	ChP	0	0	3	0	4	3	0	3	3	0	4	7	0	1	0	4	4	1	6	0	0	3
336	ChP	0	12	0	4	8	4	4	2	6	2	0	12	2	8	0	4	4	4	10	4	0	8	4	2	336	ChP	0	0	4	6	16	6	1	3	6	0	11	16	0	11	0	3	11	6	17	0	0	4
337	ChP	6	14	3	0	4	2	4	0	0	0	0	16	4	7	0	6	3	2	25	5	0	4	9	0	337	ChP	0	0	2	2	18	0	2	2	6	0	12	18	2	8	0	0	4	4	4	0	0	4
338	ChP	0	16	7	0	1	1	0	0	0	0	0	3	5	5	0	1	5	5	10	1	0	3	0	0	338	ChP	0	0	1	1	1	5	1	0	0	1	1	3	0	5	0	1	5	0	3	0	0	3
339	ChP	1	22	8	4	0	0	2	0	5	1	0	12	0	5	0	2	5	4	24	0	0	9	9	0	339	ChP	0	0	3	4	14	10	1	4	3	6	4	10	3	4	0	4	4	3	7	1	0	4
340	ChP	1	28	7	1	0	0	1	0	3	1	1	26	3	7	0	0	11	5	30	3	0	7	5	0	340	ChP	0	0	0	3	3	3	1	3	3	1	5	9	3	13	0	3	3	3	3	0	0	7
341	ChP	3	28	8	2	2	0	3	0	2	0	2	8	3	4	0	2	4	9	19	2	2	5	0	0	341	ChP	0	0	2	4	8	8	2	2	2	5	11	8	0	7	0	2	5	5	8	4	0	5
342	ChP	5	15	8	2	0	0	0	0	0	2	0	9	0	6	0	2	6	2	9	0	0	6	2	2	342	ChP	0	0	0	4	10	5	2	6	5	0	4	12	0	4	0	2	3	4	2	0	0	4
343	ChP	0	16	5	0	0	0	0	0	0	0	0	3	3	3	0	0	8	5	11	3	0	5	1	0	343	ChP	0	0	2	5	16	7	0	8	5	0	4	10	0	7	0	7	8	4	5	0	0	2
344	ChP	2	32	14	4	0	2	4	0	0	0	0	12	7	9	0	2	9	7	14	0	2	2	0	2	344	ChP	0	0	0	4	5	2	0	2	2	2	2	16	2	2	0	4	5	4	5	5	0	2
345	ChP	0	10	9	2	0	2	0	0	0	2	0	7	0	4	0	2	4	5	7	2	0	3	2	3	345	ChP	0	0	5	0	2	2	1	0	0	0	2	0	0	2	0	1	7	0	6	0	0	0
346	ChP	0	29	21	0	0	2	2	0	0	0	0	4	3	4	0	0	6	4	11	0	0	3	0	0	346	ChP	0	0	12	1	8	10	1	0	1	0	2	5	0	2	0	0	6	0	2	2	1	1
347	ChP	3	54	28	3	0	0	0	0	3	3	0	11	3	5	0	0	3	3	26	1	3	7	7	0	347	ChP	0	0	5	9	25	20	0	9	8	5	12	22	0	19	2	2	18	5	6	3	2	13
348	ChP	3	32	15	0	0	0	0	0	0	0	0	7	3	5	0	0	3	3	15	1	1	5	1	0	348	ChP	0	0	2	3	6	2	0	3	2	0	5	5	0	8	0	3	11	2	14	0	0	2
349	ChP	5	17	19	1	1	0	0	0	0	1	0	8	3	0	0	0	6	6	11	3	0	5	0	0	349	ChP	0	0	1	0	1	0	0	1	8	3	5	7	0	3	0	1	3	3	7	3	0	1
350	ChP	5	58	26	2	0	0	2	0	0	3	0	12	9	11	0	2	5	11	27	0	0	6	2	2	350	ChP	0	0	2	5	7	7	2	4	5	7	12	18	2	15	0	10	10	2	5	2	0	4
351	ChP	4	37	24	0	0	0	0	0	0	0	0	6	5	5	0	0	10	8	20	0	0	0	2	0	351	ChP	0	0	4	6	2	6	2	9	4	0	2	11	0	11	0	4	6	9	6	4	0	4
352	ChP	5	38	17	0	0	0	2	0	0	0	0	8	4	8	0	0	2	6	16	0	0	3	2	2	352	ChP	0	0	4	4	5	3	2	4	4	6	5	5	4	12	2	4	4	4	11	0	0	6
353	ChP	0	18	16	2	0	0	0	0	0	0	0	4	0	3	0	0	3	4	4	3	0	4	2	0	353	ChP	0	0	13	6	8	15	1	1	5	1	2	13	3	15	0	3	7	3	12	1	2	3
354	ChP	3	35	21	0	0	0	1	0	0	0	0	6	0	3	0	0	5	3	18	0	0	6	3	0	354	ChP	0	0	2	2	4	6	4	0	0	2	2	6	4	6	0	2	0	2	2	2	0	2
355	ChP	0	29	11	1	0	0	0	0	0	0	0	8	5	8	0	0	8	5	13	1	1	2	1	5	355	ChP	0	0	6	10	13	5	3	7	3	6	11	18	4	20	2	2	7	6	15	6	3	6
356	ChP	1	28	15	4	0	0	0	0	0	4	0	2	2	9	0	0	4	6	5	1	1	6	2	2	356	ChP	0	0	6	0	5	10	1	5	5	2	5	10	1	8	0	1	4	2	2	1	1	1
357	ChP	1	21	18	0	0	0	0	0	0	0	0	3	0	3	0	0	3	3	6	0	0	0	1	1	357	ChP	0	0	0	3	1	6	1	1	0	0	0	3	0	6	0	4	0	3	3	0	0	4
358	ChP	0	15	15	1	0	0	0	0	1	0	3	4	0	4	0	0	3	3	11	1	0	4	0	0	358	ChP	0	0	3	0	5	3	0	1	0	0	3	5	1	10	0	0	6	0	6	0	0	1
359	ChP	2	46	42	4	2	0	2	0	0	2	0	10	0	8	0	2	4	10	22	2	4	8	2	0	359	ChP	0	0	11	6	4	2	2	2	4	2	8	8	2	11	0	3	7	3	3	0	0	4
360	ChP	2	32	24	2	0	2	0	2	0	0	0	2	3	2	0	0	3	3	20	2	0	7	2	0	360	ChP	0	0	7	3	7	7	0	1	3	1	3	13	0	5	0	3	7	1	7	0	0	1
361	ChP	7	13	26	0	0	0	0	0	0	0	0	4	1	4	0	1	4	7	12	0	0	4	1	0	361	ChP	0	0	3	4	9	6	4	4	4	4	7	10	1	9	3	4	7	0	7	1	0	7
362	ChP	0	10	23	0	0	0	0	0	0	0	0	6	1	2	0	2	6	0	8	1	0	5	1	1	362	ChP	0	0	10	3	8	5	1	0	5	8	7	12	1	7	1	1	5	4	4	3	1	5
363	ChP	4	67	48	3	0	0	2	0	0	1	0	10	3	9	0	1	8	9	29	2	0	9	1	1	363	ChP	0	0	0	4	7	4	2	2	4	0	7	5	0	5	0	2	2	4	5	0	0	2
364	ChP	3	30	21	3	0	0	0	0	0	0	0	0	3	3	0	0	3	7	9	2	0	5	0	0	364	ChP	0	0	8	7	7	3	2	3	11	5	8	17	4	13	0	4	11	6	12	2	2	3
365	ChP	1	20	28	1	1	0	0	0	1	0	0	5	3	2	0	0	6	1	10	2	1	0	0	1	365	ChP	0	0	8	3	8	8	3	3	12	5	8	22	0	15	0	8	12	0	7	3	1	5
366	ChP	4	72	27	3	1	0	4	0	3	3	0	16	5	12	0	0	12	12	30	0	0	8	7	1	366	ChP	0	0	5	0	2	13	0	0	4	0	2	8	0	8	2	2	8	4	8	2	0	5
367	ChP	1	44	40	3	0	0	1	0	1	0	0	3	1	5	0	3	5	1	9	1	0	1	0	0	367	ChP	0	0	5	0	0	5	0	0	0	1	0	1	0	0	0	0	4	1	0	0	0	4
368	ChP	2	63	44	4	0	0	0	0	2	0	0	18	6	9	0	0	6	7	18	4	0	9	2	2	368	ChP	0	0	7	3	7	9	0	4	6	2	4	12	1	8	0	4	3	1	4	0	0	9
369	ChP	8	50	50	3	1	0	0	0	0	0	1	5	3	3	0	5	10	5	13	5	1	8	3	1	369	ChP	0	0	16	4	3	10	1	0	1	0	7	10	1	7	0	1	4	0	6	0	0	0
370	ChP	3	63	38	2	0	0	0	0	0	2	0	14	4	5	0	0	10	5	20	2	0	7	0	3	370	ChP	0	0	5	5	11	6	2	7	6	2	20	15	3	22	0	4	13	5	11	4	0	9
371	ChP	5	67	46	5	0	0	2	0	0	2	0	7	7	10	0	2	13	11	23	2	0	2	2	5	371	ChP	0	0	9	2	4	13	2	0	0	4	0	8	2	8	0	0	4	0	2	0	3	3
372	ChP	4	71	43	4	1	0	1	0	0	0	0	10	6	1	0	0	6	7	24	1	0	7	1	1	372	ChP	0	0	3	3	0	8	1	0	1	1	3	3	0	8	0	0	1	1	5	1	0	3
373	ChP	5	40	37	0	0	0	1	0	0	0	0	5	1	5	0	0	2	2	12	0	0	8	0	0	373	ChP	0	0	0	0	2	2	0	2	4	0	4	9	0	4	0	4	2	4	9	2	2	2
374	ChP	0	26	23	3	0	0	0	0	0	0	0	3	2	6	0	0	4	3	3	0	0	0	0	2	374	ChP	0	0	1	3	5	3	0	0	1	0	9	7	1	5	0	3	7	3	13	1	0	0
375	ChP	3	39	25	1	1	0	1	0	0	0	0	5	0	3	0	0	7	5	14	3	1	3	0	3	375	ChP	0	0	3	3	2	4	0	1	2	2	4	9	2	3	0	3	3	2	7	1	0	1
376	ChP	2	31	29	4	0	0	0	0	0	2	0	4	4	4	0	0	6	0	16	2	0	4	2	2	376	ChP	0	0	2	6	2	4	0	2	8	4	10	17	0	17	2	6	4	8	15	0	0	6
377	ChP	2	32	30	4	0	1	0	0	0	0	0	4	2	5	0	1	4	5	15	1	0	5	0	0	377	ChP	0	0	0	5	8	8	2	2	5	2	10	8	0	8	0	5	8	2	7	2	0	2
378	ChP	2	16	25	2	0	0	2	0	0	0	0	2	2	4	0	0	6	2	8	0	0	4	4	2	378	ChP	0	0	0	8	14	6	4	3	6	4	14	24	6	26	0	4	14	2	17	2	2	4
379	ChP	1	40	9	0	0	0	3	0	0	0	0	3	1	0	0	0	3	4	8	0	0	8	1	0	379	ChP	0	0	0	9	13	2	0	2	8	1	9	10	2	4	0	0	4	7	10	1	1	6
380	ChP	3	67	19	4	0	0	0	0	0	0	0	8	2	4	0	2	4	8	17	2	0	4	3	0	380	ChP	0	0	5	1	7	17	0	1	4	0	7	10	0	7	0	0	7	4	7	1	0	0
381	ChP	2	37	25	2	0	0	0	0	0	0	0	5	2	4	0	0	7	2	8	0	0	2	0	0	381	ChP	0	0	3	3	5	8	1	0	3	0	3	8	0	5	0	1	5	3	6	5	0	5
382	ChP	3	55	28	2	0	0	2	0	0	0	0	9	2	9	0	0	5	6	17	2	3	6	0	0	382	ChP	0	0	3	5	8	6	0	1	10	1	3	16	0	8	1	3	1	6	6	1	3	5
383	ChP	4	51	35	3	0	0	1	0	0	0	0	7	3	6	0	0	9	4	16	1	0	4	0	3	383	ChP	0	0	3	1	3	5	3	1	3	3	3	15	3	5	0	1	0	3	8	1	0	3
384	ChP	4	44	18	4	0	4	0	0	0	1	0	3	3	5	0	0	3	7	18	3	0	5	0	0	384	ChP	0	0	1	0	3	2	0	0	2	1	7	5	0	3	0	2	0	1	3	1	1	1
385	ChP	2	55	37	0	0	0	2	0	0	2	0	7	0	5	0	0	8	2	15	2	0	7	2	0	385	ChP	0	0	1	1	3	3	3	0	0	7	0	7	5	5	0	7	5	5	5	0	0	3
386	ChP	7	66	40	3	0	0	0	0	0	0	0	13	1	5	0	0	9	5	33	1	0	7	1	3	386	ChP	0	0	7	3	7	8	5	0	3	1	5	8	1	10	0	0	5	1	10	3	0	1
387	ChP	2	54	40	2	0	0	0	0	0	0	0	5	0	3	0	0	9	2	11	0	0	3	3	3	387	ChP	0	0	4	0	0	4	0	0	0	0	2	5	1	10	0	0	5	0	0	0	1	2
388	ChP	2	62	29	0	2	0	2	0	0	2	0	3	5	8	0	0	9	5	14	2	0	5	0	2	388	ChP	0	0	4	1	1	3	3	0	0	1	4	4	0	3	0	0	4	0	4	1	0	1
389	ChP	8	65	40	2	0	0	0	0	0	2	0	7	5	4	0	0	5	4	25	2	0	7	2	2	389	ChP	0	0	2	6	10	2	3	2	9	2	5	18	2	7	2	2	6	3	7	3	0	6
390	ChP	7	48	18	2	0	0	0	0	0	0	0	7	2	7	0	2	5	5	7	2	0	4	2	2	390	ChP	0	0	2	2	5	6	0	3	5	2	6	9	0	2	2	2	2	2	8	2	0	0
391	ChP	4	76	26	2	0	0	2	0	0	0	0	12	4	10	0	2	10	10	22	2	0	6	4	0	391	ChP	0	0	9	5	13	8	0	0	3	0	6	13	3	11	0	3	11	0	8	3	0	6
392	ChP	1	64	48	1	0	0	1	0	1	0	0	4	0	5	0	1	11	7	13	4	0	6	0	2	392	ChP	0	0	1	6	11	1	2	2	5	0	10	19	2	7	0	4	10	4	12	0	0	11
393	ChP	8	86	36	0	0	0	0	0	0	2	0	8	6	7	0	0	5	8	27	2	3	11	3	2	393	ChP	0	0	2	0	2	4	0	0	2	0	6	6	2	4	0	2	10	2	2	4	0	4
394	ChP	0	25	22	4	0	0	0	0	0	0	0	2	0	2	0	0	5	2	5	0	2	5	0	2	394	ChP	0	0	0	4	2	4	0	2	4	0	6	14	4	4	0	2	6	2	4	2	0	6
395	ChP	2	53	48	3	0	0	2	0	0	0	0	9	0	4	0	0	20	4	22	0	0	11	2	0	395	ChP	0	0	0	2	5	10	2	2	5	2	4	10	0	10	0	2	4	7	10	0	0	5
396	ChP	3	24	18	0	0	1	0	0	1	0	0	6	0	4	0	0	10	4	3	0	0	3	0	0	396	ChP	0	0	11	0	1	11	3	0	4	0	6	10	1	7	0	0	7	1	7	1	0	6
397	ChP	2	34	22	2	0	0	0	0	0	0	0	6	0	4	0	2	4	4	18	0	0	2	0	0	397	ChP	0	0	0	3	5	1	0	0	5	0	3	10	0	5	0	5	7	5	7	0	3	3
398	ChP	5	24	28	0	1	0	1	0	0	1	0	0	1	4	0	1	10	1	9	0	0	5	0	1	398	ChP	0	0	2	0	3	2	2	2	2	0	4	11	2	7	0	3	4	7	7	0	0	3
399	ChP	5	58	28	0	0	0	0	0	2	0	0	2	0	8	0	0	4	7	11	2	0	5	2	2	399	ChP	0	0	0	2	10	1	1	0	6	2	4	17	2	12	0	5	8	6	7	0	0	0
400	ChP	1	14	29	1	0	0	1	0	0	0	0	1	0	3	0	0	8	1	11	0	0	5	0	0	400	ChP	0	0	1	0	5	6	1	0	6	1	7	17	4	6	1	5	5	10	15	5	1	7
401	ChP	3	97	53	6	0	0	3	0	0	1	0	11	3	6	0	0	6	9	22	3	0	17	3	1	401	ChP	0	0	3	6	6	2	0	0	3	2	7	20	3	13	0	4	5	7	16	2	2	8
402	ChP	6	62	31	0	0	0	3	0	0	3	0	7	0	12	0	0	6	5	26	2	0	5	0	0	402	ChP	0	0	1	8	6	16	1	2	5	2	8	22	1	12	1	2	6	8	11	5	0	4
403	ChP	0	21	24	0	0	0	1	0	0	0	0	1	1	5	0	0	4	2	9	0	1	5	0	1	403	ChP	0	0	6	0	3	3	3	0	0	0	5	3	2	2	0	2	5	2	4	0	0	3
404	ChP	3	60	35	2	0	0	1	0	0	2	0	6	4	4	0	0	4	2	16	0	0	9	0	0	404	ChP	0	0	3	4	4	3	0	0	6	0	3	14	0	4	0	3	3	4	11	3	0	3
405	ChP	10	70	49	4	0	0	0	0	0	3	0	5	3	2	0	0	12	2	22	3	2	7	2	0	405	ChP	0	1	15	1	2	9	4	0	3	2	3	11	0	6	1	1	0	2	4	2	0	6
406	ChP	4	50	14	0	0	0	0	0	0	1	0	0	1	0	0	0	6	3	17	0	0	6	0	0	406	ChP	0	0	1	4	6	3	3	1	1	1	13	29	6	12	0	0	10	6	19	0	1	3
407	ChP	7	58	39	1	0	0	0	0	0	3	0	3	3	3	0	0	7	5	17	1	0	5	1	0	407	ChP	0	0	2	2	0	2	2	0	2	0	4	0	0	2	0	0	2	0	2	0	0	0
408	ChP	0	42	40	0	0	0	0	0	0	2	0	2	0	0	0	2	4	6	8	2	2	8	0	4	408	ChP	0	0	0	1	0	2	0	0	2	1	4	9	1	0	0	2	2	1	10	4	0	1
409	ChP	4	53	14	3	0	0	1	0	0	1	0	7	4	1	0	0	7	4	18	0	0	4	1	0	409	ChP	0	0	6	3	0	6	0	0	3	0	3	6	0	0	0	0	3	3	6	1	0	3
410	ChP	3	33	19	0	1	0	0	0	1	1	0	3	0	3	0	1	4	1	9	0	0	0	1	1	410	ChP	0	0	2	3	4	6	4	0	4	0	5	14	2	11	0	2	8	5	12	2	0	4
411	ChP	5	49	34	0	0	0	3	0	3	0	2	2	0	4	0	0	5	4	7	0	2	4	0	2	411	ChP	0	0	9	3	2	3	0	0	2	0	3	16	2	17	0	0	8	4	8	4	0	4
412	ChP	5	52	35	1	0	0	0	0	0	1	0	5	1	3	0	1	5	7	16	3	1	5	0	1	412	ChP	0	0	0	3	0	3	0	0	3	0	2	8	2	2	2	0	2	3	7	0	0	2
413	ChP	2	27	38	0	0	0	0	0	0	0	0	2	2	5	0	0	2	2	13	0	0	7	0	2	413	ChP	0	0	9	1	1	4	0	0	0	1	1	5	1	5	0	2	4	5	5	0	0	5
414	ChP	9	38	35	3	0	0	1	0	0	0	0	3	4	6	0	1	4	4	13	0	0	7	0	0	414	ChP	0	0	3	0	2	2	4	0	2	0	11	8	2	17	0	2	6	4	6	2	0	2
415	ChP	3	29	17	0	1	0	0	0	0	0	0	5	0	5	0	0	3	1	9	1	1	1	0	0	415	ChP	0	0	0	3	0	10	0	0	2	0	2	4	4	1	0	0	5	1	4	0	0	1
416	ChP	6	33	41	4	0	0	2	0	0	0	0	3	0	2	0	0	8	5	14	2	0	5	0	2	416	ChP	0	0	3	4	0	4	0	0	3	2	6	6	0	4	0	3	3	4	10	2	0	6
417	ChP	3	40	35	0	0	0	3	0	1	1	0	5	0	3	0	1	6	1	16	1	1	3	0	1	417	ChP	0	0	8	2	0	6	0	0	2	2	6	5	2	12	0	2	10	2	2	3	0	3
418	ChP	5	34	34	2	0	0	2	0	0	2	0	2	0	2	0	0	9	5	8	2	0	10	0	0	418	ChP	0	1	5	5	5	7	3	0	3	3	17	25	3	19	0	0	13	7	7	0	1	5
419	ChP	7	45	29	1	0	0	0	0	0	0	0	8	0	3	0	0	10	5	12	3	0	5	3	3	419	ChP	0	0	4	3	0	2	0	0	4	4	2	5	2	6	0	2	5	0	4	2	0	3
420	ChP	2	23	6	3	0	2	2	0	0	0	0	2	0	6	0	0	5	0	9	0	0	3	2	0	420	ChP	0	0	5	0	0	9	0	0	1	3	5	3	3	12	0	5	9	1	3	0	0	1
421	ChP	6	59	51	0	0	0	3	0	0	3	1	6	1	6	0	0	6	4	22	1	1	6	3	0	421	ChP	0	0	3	2	2	3	3	0	2	2	3	8	3	8	0	2	8	2	3	0	0	8
422	ChP	4	35	26	2	3	0	2	0	0	0	0	5	3	3	0	0	8	2	10	0	0	5	2	0	422	ChP	0	0	0	4	2	4	2	0	0	0	2	4	2	6	0	0	2	2	6	0	2	4
423	ChP	2	25	17	4	0	2	2	0	0	0	0	4	4	4	0	0	5	3	10	0	0	4	4	4	423	ChP	0	1	3	3	5	7	3	0	3	0	9	15	5	21	0	1	11	7	9	3	0	0
424	ChP	5	49	26	0	0	1	0	0	0	1	0	7	3	5	0	0	1	5	13	0	0	3	5	3	424	ChP	0	0	7	2	6	4	2	0	6	0	4	19	2	4	0	0	4	4	9	0	0	4
425	ChP	0	38	16	2	0	0	0	0	0	0	2	4	2	4	0	0	2	0	6	0	0	2	0	0	425	ChP	0	0	4	2	2	5	2	0	0	0	2	10	0	7	0	0	3	4	10	0	0	2
426	ChP	2	42	20	6	0	0	2	0	0	2	0	4	2	3	0	0	7	4	7	2	0	6	0	2	426	ChP	0	0	3	3	5	3	0	0	3	0	8	8	1	13	0	3	5	5	13	3	0	0
427	ChP	10	85	30	5	2	0	0	0	0	0	2	6	2	6	0	0	7	7	10	2	2	9	5	2	427	ChP	0	0	12	2	0	6	0	0	0	2	3	3	3	4	0	0	5	2	0	2	2	3
428	ChP	5	33	50	4	0	2	2	0	0	2	0	8	5	5	0	0	10	7	18	0	0	4	4	2	428	ChP	0	0	1	5	5	3	1	0	3	0	8	15	1	10	0	3	10	10	8	3	3	3
429	ChP	2	61	34	2	2	2	0	0	0	2	0	3	3	2	0	0	10	6	15	0	0	9	3	0	429	ChP	0	0	3	3	0	5	0	0	1	1	5	11	3	7	0	1	5	7	18	0	0	3
430	ChP	0	22	12	0	0	0	0	0	0	0	0	2	2	2	0	0	8	2	2	0	0	2	0	2	430	ChP	0	0	1	2	0	3	0	0	6	0	7	8	1	5	0	0	3	1	5	1	0	8
431	ChP	0	9	13	0	1	1	0	0	0	0	0	0	0	0	0	0	3	0	1	0	0	0	0	0	431	ChP	0	0	0	3	0	0	0	0	3	1	3	5	0	5	0	1	3	3	8	1	0	1
432	ChP	5	85	30	4	2	0	0	0	0	2	0	6	4	9	0	1	7	12	16	1	0	10	9	2	432	ChP	0	0	0	7	5	1	1	1	8	1	8	22	3	11	0	5	14	4	12	4	0	4
433	ChP	2	24	17	2	2	0	2	0	0	0	0	5	0	2	0	0	6	2	7	0	0	2	2	0	433	ChP	0	0	10	0	0	10	2	0	2	2	4	6	2	8	0	2	10	4	6	2	0	2
434	ChP	6	35	23	2	0	0	2	0	0	2	0	6	2	2	0	0	2	5	6	0	2	6	0	2	434	ChP	0	1	0	2	0	0	0	0	4	0	5	4	0	10	0	0	1	1	10	2	0	8
435	ChP	6	83	12	4	0	0	4	0	0	0	0	4	2	2	0	0	8	4	18	0	0	6	8	0	435	ChP	0	0	3	5	3	6	2	0	9	2	8	18	2	18	0	5	12	9	15	2	0	5
436	ChP	6	43	12	4	0	0	2	0	0	0	0	4	2	2	0	0	4	6	17	0	2	2	2	0	436	ChP	0	0	2	4	0	0	2	0	2	0	2	2	0	4	0	3	3	3	4	2	0	7
437	ChP	5	23	10	3	0	0	1	0	0	1	0	7	0	4	0	0	4	3	8	1	0	10	0	1	437	ChP	0	0	11	1	0	3	0	0	1	0	7	5	1	4	0	1	2	7	13	1	0	3
438	ChP	5	35	40	1	0	0	0	0	0	1	0	1	4	5	0	0	5	2	12	2	2	8	1	1	438	ChP	0	0	12	2	1	0	1	0	1	0	3	12	1	6	0	1	5	8	18	2	0	8
439	ChP	0	23	10	0	0	0	1	0	0	1	2	1	0	4	0	0	2	1	5	0	1	0	0	0	439	ChP	0	0	1	3	0	7	3	0	12	0	8	15	3	15	0	3	12	5	17	3	0	8
440	ChP	2	55	24	2	2	2	2	0	0	2	0	5	3	3	0	2	8	0	9	2	0	3	0	2	440	ChP	0	2	2	2	0	0	0	2	4	0	4	15	0	5	0	0	9	4	9	2	0	12
441	ChP	0	0	0	8	1	4	2	2	5	0	7	6	1	6	0	4	0	0	5	0	0	1	0	0	441	ChP	0	0	1	5	7	6	1	6	12	5	5	17	2	8	0	1	8	0	11	1	1	4
442	ChP	2	2	3	8	13	16	2	7	2	9	9	4	2	28	3	7	10	3	9	5	2	7	3	2	442	ChP	0	0	2	2	10	7	0	2	5	4	10	15	2	12	0	0	5	2	10	2	0	4
443	ChP	0	0	1	5	5	0	1	18	1	4	5	17	3	11	0	3	5	3	14	3	0	3	4	0	443	ChP	0	0	3	10	3	10	2	2	0	2	6	12	2	6	2	2	3	2	16	2	0	5
444	ChP	0	0	0	8	12	0	0	3	3	3	6	12	0	7	0	2	4	4	17	2	3	4	7	0	444	ChP	0	0	0	3	3	3	1	0	3	0	8	13	1	12	1	3	7	2	7	1	0	5
445	ChP	0	1	4	9	6	3	3	6	3	2	6	18	2	11	0	5	6	3	20	0	1	5	10	0	445	ChP	0	0	4	4	4	13	2	0	5	4	7	18	2	6	3	5	3	8	12	0	0	4
446	ChP	2	4	22	12	5	14	8	6	0	6	4	17	3	31	0	5	13	5	14	4	0	9	0	0	446	ChP	0	0	1	3	9	18	0	0	14	3	1	12	5	1	0	3	3	7	16	3	1	12
447	ChP	2	2	6	9	13	6	2	5	2	2	5	14	2	15	2	6	10	0	15	0	0	6	0	0	447	ChP	0	0	21	6	2	18	2	2	6	0	10	10	3	6	0	3	13	2	17	2	2	6
448	ChP	0	0	0	8	1	1	3	3	3	0	7	20	4	4	0	1	5	8	21	3	0	5	7	3	448	ChP	0	0	0	2	5	9	0	0	8	2	2	8	0	5	0	7	3	3	19	3	0	7
449	ChP	2	8	4	5	2	5	2	4	0	2	5	7	2	21	0	2	7	5	15	2	0	4	2	0	449	ChP	0	0	5	6	9	0	2	0	4	0	8	18	2	10	0	4	8	2	9	0	0	3
450	ChP	0	8	2	5	2	0	2	0	2	3	5	12	2	11	0	2	6	6	30	2	0	8	2	2	450	ChP	0	0	4	3	8	4	0	1	6	3	4	7	0	6	0	7	6	0	7	3	0	3
451	ChP	0	19	4	9	0	0	0	0	0	1	0	7	2	10	0	0	13	4	29	2	0	8	1	0	451	ChP	0	0	4	4	3	8	0	3	7	4	7	13	3	10	1	7	5	4	14	4	0	4
452	ChP	2	26	7	2	0	0	2	0	0	0	0	7	0	4	0	2	2	4	23	2	0	2	0	0	452	ChP	0	0	3	6	11	8	2	7	7	3	7	11	2	10	0	4	7	3	14	3	2	8
453	ChP	1	14	3	1	0	0	3	0	0	1	0	12	5	10	0	0	3	7	16	0	0	9	1	0	453	ChP	0	0	4	4	1	4	0	1	4	0	4	10	4	7	0	1	7	4	7	0	0	1
454	ChP	0	16	3	6	0	0	1	0	2	1	0	8	3	7	0	1	6	5	16	0	0	6	6	0	454	ChP	0	0	5	7	3	7	1	5	5	5	7	16	1	5	0	1	7	0	10	0	0	5
455	ChP	0	77	9	2	0	4	2	0	0	4	0	28	4	11	0	4	9	13	46	2	0	6	9	2	455	ChP	0	0	11	9	9	9	2	2	9	2	9	25	2	22	0	11	12	11	25	2	2	9
456	ChP	5	45	11	5	0	0	0	0	0	1	1	31	3	15	1	1	11	13	37	0	3	13	13	3	456	ChP	0	3	12	4	2	8	0	0	0	0	0	11	3	7	0	3	11	12	23	0	0	5
457	ChP	4	44	16	5	0	0	0	0	5	0	0	16	6	14	1	2	4	15	31	1	0	6	1	1	457	ChP	0	0	0	5	6	8	1	5	8	1	6	10	1	11	1	5	3	5	13	3	0	5
458	ChP	0	51	12	6	0	0	3	0	3	3	0	8	6	23	0	3	9	14	34	3	1	12	8	3	458	ChP	0	0	2	4	2	0	2	2	4	0	2	10	2	8	0	7	4	11	10	2	0	5
459	ChP	1	34	4	0	1	0	0	0	0	0	0	4	3	0	0	1	0	3	10	3	0	0	1	0	459	ChP	0	0	8	1	6	5	0	5	11	2	12	14	1	9	0	11	5	5	14	2	0	6
460	ChP	0	52	9	0	3	0	0	3	0	1	0	7	12	18	0	3	6	4	11	1	3	6	0	3	460	ChP	0	2	12	0	0	8	0	0	2	0	3	13	0	3	0	0	3	4	19	3	0	4
461	ChP	3	37	12	0	0	0	6	0	0	0	0	7	1	7	0	1	6	3	14	1	0	1	0	0	461	ChP	0	0	6	7	0	4	3	1	7	3	9	19	0	4	1	10	12	12	32	4	0	13
462	ChP	2	30	11	2	0	0	0	0	0	2	0	8	0	0	0	3	0	2	9	0	0	2	2	0	462	ChP	0	0	32	4	0	6	1	0	4	0	4	19	6	10	0	1	13	7	10	3	0	7
463	ChP	9	46	15	4	0	0	3	0	0	0	0	6	10	11	0	6	9	6	25	5	0	11	3	0	463	ChP	0	0	3	7	13	5	2	0	6	3	9	21	2	14	0	8	15	3	14	0	2	5
464	ChP	0	28	19	2	0	2	0	0	7	0	0	5	2	5	0	2	8	5	8	4	0	4	0	0	464	ChP	0	4	6	3	0	0	0	0	0	3	0	13	0	5	0	0	3	5	11	0	0	3
465	ChP	1	34	15	0	0	0	1	0	3	1	0	9	2	9	0	0	1	9	12	0	0	4	1	0	465	ChP	0	0	10	2	0	1	0	0	0	0	3	17	0	3	0	0	3	9	12	1	1	4
466	ChP	4	63	20	2	0	0	0	0	0	0	0	24	4	10	0	6	8	12	32	2	2	8	4	2	466	ChP	0	0	7	2	0	2	0	0	6	0	1	8	1	4	0	1	4	3	12	3	0	5
467	ChP	0	11	8	0	3	0	0	0	0	0	3	7	3	8	0	0	3	3	8	4	0	4	2	0	467	ChP	0	0	7	6	12	7	4	0	16	4	11	16	2	16	0	4	9	2	11	2	2	4
468	ChP	2	45	48	0	0	0	2	0	0	5	0	9	9	6	0	3	13	12	12	2	0	5	2	0	468	ChP	0	0	5	2	0	4	2	0	2	3	2	8	2	8	0	0	8	5	6	0	0	3
469	ChP	4	29	21	2	0	0	0	0	0	2	2	4	2	7	0	2	4	2	13	4	0	7	0	2	469	ChP	0	0	25	1	0	0	0	0	4	1	0	9	4	10	0	0	6	3	7	0	0	4
470	ChP	2	60	18	2	0	0	0	0	0	0	0	2	2	9	0	2	2	8	15	2	0	5	2	0	470	ChP	0	2	5	9	0	9	2	3	8	9	3	36	9	24	0	5	20	8	37	9	3	14
471	ChP	0	54	16	3	0	0	1	0	0	0	0	12	4	7	0	0	7	9	19	1	0	3	4	1	471	ChP	0	0	7	0	0	0	1	0	1	1	3	7	1	1	0	0	3	0	7	0	0	5
472	ChP	2	23	14	1	0	0	0	0	0	1	0	1	1	0	0	0	2	1	4	1	0	3	2	0	472	ChP	0	1	17	3	0	1	0	0	1	0	1	11	0	11	0	3	5	5	19	1	0	5
473	ChP	8	65	19	2	0	0	0	0	0	2	0	6	4	4	0	0	2	8	15	4	0	4	0	2	473	ChP	0	4	13	1	0	4	1	0	4	1	6	22	1	4	0	0	4	2	21	1	1	6
474	ChP	3	53	12	1	0	0	0	0	0	3	0	12	9	12	0	1	3	3	12	0	0	3	0	4	474	ChP	0	0	14	1	0	1	0	0	2	3	0	14	1	7	0	0	6	2	21	3	0	5
475	ChP	3	58	28	3	0	0	3	0	0	2	0	17	8	7	0	2	7	9	31	4	0	13	0	2	475	ChP	0	0	3	3	0	5	0	0	3	0	7	18	3	11	0	3	7	9	16	1	1	5
476	ChP	7	42	20	4	0	0	2	0	0	0	0	0	2	5	0	0	0	5	21	0	0	5	0	2	476	ChP	0	0	5	3	0	1	1	0	5	0	0	7	1	7	0	0	5	0	15	0	0	1
477	ChP	2	35	11	2	6	0	0	3	0	0	4	7	4	7	0	2	0	3	10	4	0	3	0	4	477	ChP	0	0	3	3	0	0	3	0	6	0	1	6	1	6	0	3	14	6	22	1	0	4
478	ChP	2	29	8	0	0	0	0	0	0	0	0	0	4	5	0	2	6	3	8	2	0	3	4	0	478	ChP	0	1	2	1	0	1	2	0	2	1	0	5	4	14	0	1	5	3	17	0	0	6
479	ChP	4	46	32	0	0	0	0	0	0	2	0	5	7	5	0	0	11	4	11	5	0	5	4	2	479	ChP	0	2	14	5	0	2	2	0	4	2	5	16	0	6	0	2	14	11	22	2	0	4
480	ChP	4	19	11	0	0	0	0	0	0	0	0	9	0	2	0	0	3	7	11	2	0	4	0	2	480	ChP	0	3	3	0	0	1	0	0	2	1	0	8	0	7	0	2	5	8	13	0	0	7
481	ChP	3	79	18	3	0	0	3	0	0	2	0	3	4	5	0	2	0	5	13	6	2	5	0	0	481	ChP	0	0	7	1	1	3	3	0	0	1	3	5	0	9	0	3	3	3	13	0	3	7
482	ChP	2	26	5	0	0	0	0	0	0	0	0	4	4	3	0	1	4	6	13	0	0	8	0	1	482	ChP	0	0	4	6	0	1	2	0	5	1	1	20	5	12	0	4	10	9	15	1	2	5
483	ChP	3	50	32	3	0	0	3	0	0	1	0	9	5	7	0	0	7	7	28	3	0	7	1	1	483	ChP	0	0	6	3	3	0	0	0	8	2	0	16	3	10	0	3	4	6	16	3	0	6
484	ChP	5	26	4	0	0	0	0	0	0	0	0	2	2	1	0	0	1	6	11	0	1	11	0	0	484	ChP	0	0	1	0	0	0	0	0	4	0	0	2	1	5	0	1	4	0	6	1	0	4
485	ChP	2	49	10	2	0	0	2	0	0	2	0	4	4	4	0	2	2	7	17	2	0	7	0	0	485	ChP	0	1	0	6	0	1	0	0	11	0	0	6	3	6	0	1	6	8	23	4	0	6
486	ChP	0	64	15	0	0	0	2	0	0	2	0	2	2	8	0	0	2	6	15	2	0	4	2	0	486	ChP	0	1	5	2	0	2	0	0	2	0	2	14	5	10	0	1	9	8	24	0	1	5
487	ChP	1	37	11	0	0	0	0	0	0	0	0	2	5	4	0	1	5	1	16	1	2	1	0	0	487	ChP	0	3	11	4	0	0	0	0	2	0	0	6	2	7	0	0	7	3	10	2	0	7
488	ChP	2	20	16	0	0	0	0	0	0	0	0	4	4	0	0	0	4	2	11	2	0	4	0	0	488	ChP	0	2	24	3	0	2	2	0	7	0	4	19	0	12	0	2	7	5	29	4	0	6
489	ChP	7	57	20	2	0	0	0	0	0	1	1	18	3	9	0	0	6	1	15	6	0	6	0	2	489	ChP	1	1	9	2	0	4	2	0	0	0	0	4	0	5	0	0	3	2	4	1	0	5
490	ChP	0	67	8	3	0	0	2	0	0	2	0	8	2	5	0	2	6	6	16	0	0	9	2	0	490	ChP	0	8	3	8	0	0	1	0	1	0	0	8	1	1	0	0	12	1	18	1	0	1
491	ChP	2	33	14	0	0	0	2	0	0	2	0	4	2	4	0	0	2	2	11	0	0	2	0	2	491	ChP	0	3	1	3	3	0	0	0	1	0	6	13	3	8	0	1	6	6	39	3	0	8
492	ChP	2	35	9	3	0	0	0	0	2	0	0	3	0	6	0	0	3	0	9	2	0	7	0	2	492	ChP	0	0	10	3	0	0	0	0	1	1	1	10	0	7	0	0	9	9	23	1	0	4
493	ChP	2	40	4	4	0	0	0	0	0	4	2	4	1	6	0	1	5	1	16	1	0	6	2	2	493	ChP	0	1	8	3	0	0	0	0	0	1	0	4	0	7	0	0	5	1	7	1	0	4
494	ChP	3	41	15	2	0	0	0	0	0	0	0	4	4	4	0	0	3	9	16	2	0	3	0	0	494	ChP	0	8	0	2	0	0	2	0	2	2	0	5	2	7	0	2	5	4	16	2	0	5
495	ChP	4	35	8	2	0	0	0	0	0	2	2	8	2	4	0	0	13	4	22	6	0	6	0	2	495	ChP	0	6	2	2	0	4	2	0	0	0	2	7	2	6	0	2	4	6	13	0	0	2
496	ChP	1	43	8	3	0	0	3	0	0	3	0	7	0	3	0	0	5	3	12	0	0	5	0	0	496	ChP	0	3	16	3	0	5	1	0	1	1	0	6	0	3	0	0	5	0	10	0	0	3
497	ChP	3	21	24	2	0	0	0	0	0	4	0	2	2	4	0	0	9	3	15	2	0	1	1	0	497	ChP	0	2	6	2	0	0	0	0	3	0	0	7	2	4	0	0	3	2	12	2	0	0
498	ChP	2	56	12	0	0	0	2	0	0	2	0	6	4	6	0	0	2	4	22	2	0	6	0	2	498	ChP	0	1	0	3	0	0	1	0	0	3	1	14	3	7	0	1	12	3	18	0	0	5
499	ChP	5	65	5	7	0	0	1	0	1	3	0	15	9	7	0	0	11	9	42	5	1	9	5	1	499	ChP	0	1	11	3	0	0	1	0	2	0	0	7	0	1	0	0	5	2	13	0	0	0
500	ChP	0	39	12	2	4	0	2	0	0	4	0	8	4	4	0	0	2	2	8	8	0	4	0	0	500	ChP	0	4	3	1	0	0	3	0	0	0	0	9	1	3	0	0	4	6	12	0	0	6
501	ChP	3	54	21	3	0	0	3	0	0	5	2	20	3	3	0	0	5	8	17	5	0	5	0	2	501	ChP	0	12	7	2	0	0	2	0	0	0	2	21	3	7	2	2	3	12	20	2	2	0
502	ChP	3	21	3	0	0	0	0	0	0	0	0	0	4	0	0	0	0	4	9	0	0	3	0	0	502	ChP	0	10	11	4	0	0	2	0	0	2	2	8	2	8	0	0	6	4	11	2	2	4
503	ChP	12	47	22	1	0	0	2	0	0	1	0	10	1	4	0	0	5	4	25	0	1	6	0	2	503	ChP	0	17	17	0	0	0	2	0	0	2	0	13	6	8	0	2	8	13	24	0	4	4
504	ChP	0	27	10	1	0	0	1	0	0	0	0	3	0	1	0	0	3	1	4	0	0	0	0	0	504	ChP	0	1	10	1	0	1	1	0	1	0	2	10	1	10	0	0	7	5	13	1	0	2
505	ChP	1	41	7	3	0	0	0	0	7	0	0	6	4	1	0	0	4	4	7	4	0	7	7	3	505	ChP	0	4	0	0	0	0	2	0	0	0	0	7	0	7	0	0	2	4	19	0	0	7
506	ChP	4	32	16	4	0	0	0	0	0	0	0	5	5	5	0	0	4	8	19	2	2	7	0	0	506	ChP	2	6	10	7	0	0	2	0	0	2	0	19	5	7	0	0	8	10	36	6	2	7
507	ChP	3	50	31	0	6	0	1	0	0	1	0	7	4	4	0	0	6	1	11	0	0	6	0	1	507	ChP	0	6	2	0	0	0	0	0	7	1	0	8	0	8	0	0	7	2	13	2	0	3
508	ChP	0	31	6	0	0	0	0	0	0	0	0	0	0	2	0	0	0	0	4	0	0	4	0	0	508	ChP	0	6	15	3	0	0	1	0	1	1	0	6	0	4	0	0	6	4	15	1	0	4
509	ChP	2	28	13	0	0	0	2	0	0	2	0	4	0	2	0	0	2	2	9	2	0	6	0	0	509	ChP	0	16	11	8	0	0	3	0	2	4	0	20	2	13	2	0	17	15	40	3	0	14
510	ChP	3	44	12	2	0	0	0	0	0	2	0	5	2	3	0	0	3	2	11	0	2	2	2	2	510	ChP	0	4	2	2	0	1	0	0	1	1	2	13	0	7	0	4	8	4	21	2	0	3
511	ChP	6	60	24	1	0	0	0	0	0	1	0	6	2	4	0	0	1	5	17	2	0	7	2	1	511	ChP	0	1	1	3	0	0	3	0	0	0	0	7	0	7	0	0	4	9	20	0	0	6
512	ChP	3	47	25	3	0	0	0	0	0	0	0	3	3	3	0	0	3	4	11	0	0	3	0	1	512	ChP	0	6	3	4	0	0	0	0	0	3	1	18	1	5	0	2	5	4	20	2	2	3
513	ChP	3	44	28	0	0	0	0	0	0	0	0	2	1	2	0	1	1	4	15	2	0	5	1	3	513	ChP	0	4	2	2	0	0	2	0	0	2	0	5	0	5	0	2	2	5	16	2	0	2
514	ChP	5	62	10	2	0	0	2	0	0	0	0	5	3	4	0	0	1	3	17	2	2	4	0	1	514	ChP	0	0	0	0	0	0	1	0	0	2	0	0	0	2	0	0	0	0	0	0	0	1
515	ChP	3	79	20	3	0	0	0	0	0	3	0	6	4	7	0	0	6	3	9	3	0	3	8	3	515	ChP	0	5	2	5	0	1	5	0	2	1	1	7	2	2	0	0	8	7	20	2	0	5
516	ChP	2	35	27	0	0	0	2	0	0	2	0	7	2	4	0	2	4	5	7	0	0	10	2	0	516	ChP	0	5	3	1	0	0	1	0	3	0	0	8	1	5	0	0	3	5	10	3	0	3
517	ChP	2	47	6	0	0	0	2	0	0	4	0	3	2	2	0	0	2	0	6	0	0	2	0	3	517	ChP	0	6	4	1	0	0	0	0	1	0	1	4	0	3	0	0	6	4	15	1	0	1
518	ChP	3	46	16	3	0	0	0	4	0	1	3	4	1	3	0	0	6	3	7	7	0	4	0	7	518	ChP	0	8	15	0	0	0	0	0	1	0	0	3	1	2	0	0	1	3	8	1	0	2
519	ChP	3	51	16	1	0	0	0	0	0	3	0	6	3	3	0	0	3	3	26	0	0	6	1	0	519	ChP	0	10	3	6	0	0	1	0	0	2	1	6	1	5	0	0	3	5	15	7	1	2
520	ChP	5	85	29	1	0	0	1	0	0	5	0	1	3	5	0	1	3	5	22	3	0	8	0	1	520	ChP	0	1	3	6	0	0	0	0	1	1	1	9	0	3	0	0	3	4	12	1	0	3
521	ChP	6	106	20	4	0	0	0	0	0	0	0	17	2	8	0	0	9	5	17	4	0	12	0	1	521	ChP	0	0	3	0	0	1	1	0	3	0	1	7	0	1	0	0	5	3	7	0	0	1
522	ChP	3	47	11	1	0	0	0	0	0	3	0	3	1	3	0	0	3	3	9	0	0	1	0	3	522	ChP	0	2	0	0	0	0	2	0	0	0	0	4	3	3	0	0	3	0	0	3	0	3
523	ChP	5	97	20	1	0	0	1	0	0	2	0	7	5	9	0	0	10	2	18	5	0	10	5	0	523	ChP	0	2	2	5	0	0	0	0	3	0	2	2	0	6	0	0	2	5	13	2	0	3
524	ChP	0	19	17	3	1	0	0	0	0	0	0	7	5	1	0	0	3	0	7	0	0	5	0	0	524	ChP	0	2	5	0	0	0	0	0	0	2	2	8	2	8	0	0	8	8	19	2	2	2
525	ChP	3	56	33	0	0	0	0	0	0	0	0	5	5	3	0	0	6	5	18	1	0	1	0	0	525	ChP	0	0	4	1	0	0	1	0	0	0	0	4	0	1	0	0	2	1	9	0	0	1
526	ChP	1	61	18	0	0	0	0	0	0	3	0	3	2	2	0	1	2	5	19	0	1	7	0	4	526	ChP	0	2	6	0	0	2	0	0	0	2	2	10	2	2	0	0	0	2	13	2	0	2
527	ChP	5	72	35	1	1	0	2	0	0	2	0	7	3	4	0	0	11	3	21	2	1	13	0	2	527	ChP	0	0	2	1	0	0	0	0	0	1	1	3	0	0	0	0	1	5	9	0	0	2
528	ChP	1	67	15	1	0	0	1	0	0	1	0	4	0	3	0	0	1	4	17	4	0	1	0	3	528	ChP	0	1	11	3	0	0	0	0	0	2	1	16	1	6	0	0	6	7	25	1	0	2
529	ChP	2	73	20	0	0	0	0	0	0	5	0	0	2	0	0	0	8	2	18	0	2	5	0	0	529	ChP	0	1	19	3	0	0	0	0	1	3	0	7	1	5	0	0	3	3	12	3	0	3
530	ChP	12	113	22	2	0	0	2	0	0	0	0	4	7	4	0	0	12	5	35	4	0	4	0	4	530	ChP	0	3	4	5	0	0	2	0	3	3	3	14	3	15	0	0	7	14	39	3	2	14
531	ChP	0	30	6	5	1	0	0	0	0	2	0	1	0	2	0	0	2	3	3	0	0	0	2	1	531	ChP	0	2	6	4	0	0	0	0	2	4	4	16	4	8	2	0	14	12	39	6	0	4
532	ChP	4	70	37	1	1	0	6	0	0	0	0	6	4	3	0	0	17	6	21	1	1	7	0	6	532	ChP	0	1	4	0	0	1	0	1	0	0	0	10	6	10	0	0	4	6	10	0	1	4
533	ChP	3	70	24	1	0	0	0	0	0	3	0	5	4	1	0	0	1	3	9	1	0	5	0	2	533	ChP	0	1	15	0	0	0	0	0	0	0	0	3	1	1	0	0	1	3	5	0	0	0
534	ChP	6	60	13	2	0	0	0	0	0	0	0	2	5	5	0	0	5	6	20	2	0	6	0	2	534	ChP	0	0	5	2	0	0	2	0	2	0	0	8	0	8	0	0	2	3	12	2	0	2
535	ChP	0	70	16	0	0	0	1	0	0	3	0	3	4	0	0	0	3	9	13	0	0	3	0	0	535	ChP	0	1	3	3	0	0	1	0	0	1	0	5	3	5	0	0	7	5	19	5	0	3
536	ChP	1	48	15	2	0	0	1	0	0	0	0	2	5	5	0	0	5	2	15	2	0	1	0	1	536	ChP	0	4	9	2	0	0	0	0	0	0	0	4	0	2	0	0	7	4	17	2	0	0
537	ChP	1	53	14	2	0	0	1	0	0	2	0	0	2	3	0	1	1	2	10	0	0	3	7	2	537	ChP	0	0	10	0	0	2	0	0	2	0	2	4	2	2	0	0	0	2	16	0	0	2
538	ChP	6	35	15	2	0	0	0	0	0	2	0	4	6	6	0	0	4	4	17	2	0	6	0	2	538	ChP	0	1	5	3	0	0	5	0	5	0	0	6	2	6	0	0	5	9	22	2	0	6
539	ChP	4	29	5	2	2	0	0	0	5	0	0	2	5	10	0	0	5	0	16	10	0	2	0	5	539	ChP	0	0	4	1	0	0	0	0	0	0	1	4	1	7	0	0	6	3	2	1	0	6
540	ChP	5	53	6	0	0	0	1	0	0	1	0	1	3	6	0	0	3	1	16	0	0	8	0	1	540	ChP	0	1	5	2	0	0	0	0	1	0	0	4	1	2	0	0	5	1	6	0	1	4
541	ChP	3	53	21	0	0	0	0	0	0	4	0	5	0	2	0	0	6	4	10	2	0	8	0	0	541	ChP	0	0	1	9	0	0	2	0	5	1	0	20	1	11	0	0	13	4	28	4	1	9
542	ChP	4	58	27	1	0	0	0	0	0	0	0	2	6	4	0	0	2	7	17	3	0	13	4	0	542	ChP	0	0	6	8	0	0	2	0	2	2	2	6	6	6	0	0	4	10	24	2	0	8
543	ChP	7	62	36	3	0	0	1	0	0	3	0	7	3	3	0	0	8	1	10	3	0	5	0	0	543	ChP	0	0	0	0	0	0	0	0	2	0	0	0	0	2	0	0	4	2	6	2	0	4
544	ChP	5	56	26	1	0	0	0	0	0	1	0	3	5	5	0	0	1	3	14	0	0	7	0	7	544	ChP	0	0	11	2	0	0	0	0	0	3	2	4	2	4	0	0	8	7	19	3	2	3
545	ChP	2	45	10	3	0	0	0	0	0	0	0	2	2	2	0	0	2	2	13	0	0	0	2	0	545	ChP	0	1	0	6	0	0	1	0	1	1	0	9	0	4	0	0	3	3	12	1	0	3
546	ChP	3	37	10	0	0	0	1	0	0	0	0	3	1	0	0	0	1	3	18	0	0	1	0	1	546	ChP	0	3	5	9	0	1	3	0	0	0	5	17	0	19	0	0	7	3	43	3	0	13
547	ChP	2	56	25	2	0	0	2	0	0	5	0	4	2	2	0	0	4	6	11	2	2	9	0	3	547	ChP	0	3	1	0	0	0	1	0	0	3	3	7	1	5	0	0	3	0	15	1	0	3
548	ChP	2	42	5	0	0	0	0	0	0	2	0	3	2	2	0	0	4	5	15	2	0	4	4	0	548	ChP	0	0	0	2	0	0	2	0	6	2	2	7	2	5	0	0	9	6	12	2	2	5
549	ChP	2	93	30	0	0	0	0	0	0	1	0	5	4	2	0	0	2	0	12	0	0	9	0	0	549	ChP	0	2	3	0	0	0	0	0	1	0	2	7	1	7	0	0	11	2	13	3	0	3
550	ChP	1	41	5	1	0	0	0	0	0	0	0	5	2	4	0	0	2	0	6	0	0	1	0	0	550	ChP	0	0	2	0	0	2	1	0	0	1	2	9	2	12	0	0	8	1	15	6	1	4
551	ChP	1	0	2	9	7	2	2	6	4	9	9	16	1	10	1	8	4	0	18	0	0	8	9	0	551	ChP	0	0	7	6	23	9	1	1	4	4	10	18	1	15	2	6	6	4	6	0	1	9
552	ChP	0	0	5	7	7	11	0	9	11	7	8	3	3	21	2	11	10	4	12	0	0	10	2	3	552	ChP	0	0	19	3	7	41	0	0	10	8	8	10	1	19	0	4	18	4	11	0	0	10
553	ChP	0	0	3	11	8	4	0	4	8	9	3	4	0	11	0	0	6	4	8	0	2	5	5	0	553	ChP	0	0	4	12	12	28	4	3	8	6	14	29	0	23	2	13	13	8	12	0	0	12
554	ChP	0	0	3	19	5	9	4	1	4	4	8	9	3	16	0	4	13	4	19	0	3	8	0	0	554	ChP	0	0	6	3	8	3	1	0	3	3	9	4	4	8	1	4	6	6	11	0	0	3
555	ChP	0	0	5	5	3	16	2	14	6	12	6	11	2	5	0	5	2	3	5	2	2	5	9	2	555	ChP	0	0	2	7	8	4	0	3	8	3	4	9	0	8	0	4	7	1	19	0	0	8
556	ChP	2	0	5	4	5	10	4	6	11	14	14	19	3	15	2	4	10	6	29	0	0	9	8	0	556	ChP	0	0	0	3	4	5	0	4	7	3	7	7	4	7	0	5	7	1	7	0	1	4
557	ChP	2	0	0	14	7	10	2	9	2	9	7	17	5	10	2	2	9	2	5	0	2	7	4	0	557	ChP	0	0	11	0	5	10	2	2	0	5	2	4	0	7	0	5	5	0	5	2	0	5
558	ChP	1	0	2	8	0	14	0	5	2	9	7	7	1	8	0	0	7	1	8	2	0	6	5	1	558	ChP	0	0	4	12	4	4	1	7	7	4	12	27	1	20	0	10	18	8	11	1	4	4
559	ChP	5	0	5	5	3	5	3	4	12	6	7	14	2	7	2	3	8	3	21	0	0	3	3	0	559	ChP	0	0	0	2	13	0	2	0	3	3	5	8	3	7	0	3	2	4	8	0	0	0
560	ChP	0	0	6	6	4	6	2	2	6	2	6	9	4	9	0	2	9	6	7	2	0	0	2	0	560	ChP	0	0	0	3	4	0	2	0	0	0	6	9	0	3	0	0	5	3	4	0	0	2
561	ChP	1	0	3	8	2	3	0	6	15	4	4	18	3	10	0	1	10	2	10	0	0	2	8	0	561	ChP	0	0	4	5	9	5	0	1	4	5	6	17	1	9	0	8	6	4	14	0	1	6
562	ChP	0	0	1	9	3	2	2	7	7	2	7	20	1	16	2	3	9	2	21	0	0	11	11	0	562	ChP	0	0	3	1	5	5	1	3	5	1	5	11	0	7	0	7	7	0	9	1	0	5
563	ChP	3	0	6	4	7	11	4	3	5	0	4	9	3	12	0	2	5	6	15	0	2	0	2	0	563	ChP	0	0	5	2	3	6	0	2	10	2	2	16	2	2	0	6	2	9	20	0	0	7
564	ChP	1	0	0	5	4	0	7	7	4	7	10	12	0	18	0	5	11	3	14	3	0	12	7	0	564	ChP	0	0	9	4	5	13	2	0	6	2	6	4	0	5	0	4	3	2	8	2	0	2
565	ChP	1	0	3	3	5	1	0	3	8	1	5	13	0	10	1	3	3	3	17	0	0	5	1	0	565	ChP	0	0	3	10	3	3	0	2	9	2	14	20	2	5	0	3	13	3	9	5	0	4
566	ChP	0	1	6	2	5	11	1	0	2	6	4	7	1	6	0	6	7	4	11	0	0	6	4	0	566	ChP	0	0	2	4	1	1	2	4	7	1	7	18	1	8	0	6	6	0	17	2	0	10
567	ChP	0	0	2	0	2	3	0	0	2	3	4	10	2	4	0	6	4	2	5	0	0	4	0	2	567	ChP	0	0	11	2	0	11	4	0	2	4	0	11	4	11	0	2	4	2	9	2	2	0
568	ChP	0	0	3	1	3	1	1	3	0	3	8	11	3	11	0	3	6	6	25	3	1	6	8	1	568	ChP	0	0	8	2	2	2	4	0	5	2	7	13	0	7	0	2	4	5	13	0	0	5
569	ChP	2	6	2	3	0	0	0	0	3	0	3	4	3	7	0	3	6	0	13	0	0	6	2	2	569	ChP	0	0	0	4	0	5	0	0	5	0	2	6	0	8	1	2	6	2	10	0	0	5
570	ChP	0	0	2	2	0	0	0	0	0	0	0	4	2	0	0	2	4	4	6	0	0	0	0	0	570	ChP	0	0	13	7	2	10	0	0	3	3	5	15	2	21	2	0	14	7	18	2	3	14
571	ChP	2	7	2	3	2	3	2	0	2	2	3	15	0	5	0	5	5	5	19	3	0	3	8	0	571	ChP	0	0	2	2	0	2	0	0	5	2	0	4	4	2	0	5	2	4	5	0	0	4
572	ChP	0	5	3	8	0	5	0	0	3	0	1	3	3	6	0	3	5	3	19	1	0	1	3	1	572	ChP	0	0	3	3	4	4	1	0	4	0	1	9	0	4	0	4	3	0	13	3	0	7
573	ChP	0	18	3	5	1	3	1	0	5	0	3	14	5	9	0	5	16	9	29	1	0	11	3	0	573	ChP	0	0	3	4	3	3	2	0	7	0	2	10	2	12	0	3	11	2	7	0	0	4
574	ChP	5	20	3	0	0	1	3	0	3	1	0	3	1	5	0	1	9	5	33	1	0	5	3	0	574	ChP	0	0	3	1	1	4	1	1	6	1	1	6	0	3	0	3	3	3	15	0	0	6
575	ChP	0	24	12	6	0	0	1	0	3	0	0	7	7	9	0	3	10	12	19	1	0	3	3	6	575	ChP	0	1	1	1	0	1	1	1	5	0	2	5	0	6	0	4	2	6	5	0	0	5
576	ChP	2	31	18	5	0	0	2	0	6	3	0	23	0	7	0	0	7	13	40	2	0	6	3	2	576	ChP	0	0	4	3	3	0	2	0	3	0	5	17	0	8	0	3	8	0	18	0	0	8
577	ChP	6	25	9	3	0	2	0	0	0	0	2	8	5	8	0	4	14	6	14	0	0	4	3	0	577	ChP	0	0	2	4	2	1	0	0	4	1	4	5	1	4	0	0	2	5	15	0	0	5
578	ChP	2	28	10	0	0	0	0	0	3	2	0	11	5	6	0	3	8	8	30	2	2	13	5	4	578	ChP	0	2	4	7	2	2	2	0	5	0	2	7	2	7	0	4	8	5	18	2	2	7
579	ChP	3	53	15	0	0	0	2	0	0	0	0	20	6	11	0	2	13	16	28	5	0	4	3	2	579	ChP	0	3	2	4	0	2	0	0	7	0	5	13	2	5	0	2	7	4	14	2	2	12
580	ChP	1	38	10	1	0	0	1	0	1	0	0	10	3	6	0	5	8	15	20	3	0	5	3	3	580	ChP	0	2	4	4	6	0	0	0	6	2	6	18	2	16	0	2	9	2	11	2	0	2
581	ChP	4	55	29	10	0	3	0	0	3	3	2	15	16	21	2	5	20	22	47	5	0	18	8	6	581	ChP	0	0	1	1	0	0	0	1	7	0	0	10	0	6	0	0	4	3	12	1	0	7
582	ChP	5	48	21	1	0	0	1	0	3	0	0	16	4	14	0	1	8	6	39	2	1	8	3	8	582	ChP	0	2	4	4	0	0	0	2	9	2	6	11	2	6	0	2	4	2	16	2	0	4
583	ChP	0	70	31	1	0	0	1	0	3	3	0	16	14	14	0	0	18	18	42	3	0	14	9	3	583	ChP	0	0	17	5	3	5	0	0	3	0	3	17	3	15	0	0	7	5	13	3	0	9
584	ChP	3	46	19	5	1	0	1	0	0	0	0	15	7	9	0	1	11	3	23	0	1	9	3	3	584	ChP	0	2	5	8	3	3	0	0	7	0	7	16	2	8	0	4	3	5	19	0	0	4
585	ChP	7	72	33	3	0	0	2	0	0	3	0	15	13	13	0	4	17	23	33	3	0	14	3	3	585	ChP	0	0	5	5	2	3	3	0	8	2	2	18	3	11	0	7	16	5	16	0	2	9
586	ChP	8	48	32	0	0	0	0	0	1	3	0	18	11	8	0	0	10	10	32	2	1	12	1	2	586	ChP	0	3	4	1	4	6	0	0	4	3	3	13	1	9	0	1	10	4	18	0	0	7
587	ChP	3	62	15	0	0	0	0	0	0	0	0	7	6	2	1	0	8	7	33	1	1	12	0	1	587	ChP	0	0	2	3	2	8	0	0	3	1	3	12	1	9	1	1	2	3	10	2	0	8
588	ChP	5	59	35	4	0	0	3	0	0	3	0	8	0	6	0	2	8	9	18	0	0	6	3	0	588	ChP	1	1	6	1	2	6	0	0	4	0	2	9	0	5	0	4	4	5	21	0	0	8
589	ChP	4	78	24	0	0	0	1	0	0	1	0	6	7	0	0	0	6	12	32	3	1	12	1	3	589	ChP	0	0	6	6	4	2	0	0	6	0	4	17	0	19	0	8	6	6	15	2	0	8
590	ChP	4	46	12	0	0	0	1	0	0	4	0	5	3	5	0	1	1	3	21	1	0	8	0	1	590	ChP	0	0	2	4	2	11	2	0	10	2	2	19	0	6	0	4	6	4	15	0	0	10
591	ChP	1	43	16	4	0	0	0	0	0	0	0	1	3	3	0	0	4	6	13	0	1	3	1	1	591	ChP	0	3	10	6	1	11	0	0	3	0	0	14	4	13	0	3	13	8	27	3	1	10
592	ChP	3	31	18	2	0	0	0	0	0	2	0	4	3	2	0	2	9	7	30	2	0	6	0	0	592	ChP	0	0	0	2	0	2	2	0	2	0	4	14	4	6	0	2	8	2	16	2	0	14
593	ChP	4	43	16	0	0	0	0	0	0	0	0	4	6	6	0	0	6	8	16	1	0	9	1	0	593	ChP	0	0	6	1	1	1	0	0	6	1	3	11	3	6	0	0	6	11	22	0	3	6
594	ChP	7	61	40	1	0	0	0	0	0	4	0	6	6	7	0	0	3	9	28	1	0	7	0	3	594	ChP	0	3	10	3	2	10	2	0	6	2	2	14	2	14	0	5	7	7	25	0	2	10
595	ChP	8	45	30	2	2	0	2	0	2	0	0	14	5	5	0	2	11	11	45	2	0	9	0	0	595	ChP	0	0	1	2	0	0	0	0	2	0	1	10	2	5	0	2	5	6	8	1	0	5
596	ChP	1	37	21	0	0	0	0	0	0	5	0	5	0	7	0	0	5	10	21	1	1	10	0	0	596	ChP	0	0	3	6	0	3	0	0	6	3	0	10	1	14	0	3	6	6	18	3	1	3
597	ChP	9	62	37	3	0	0	0	0	3	4	0	20	9	9	0	1	14	14	46	3	0	9	0	4	597	ChP	0	2	6	5	2	2	0	0	5	5	3	15	2	10	0	5	9	2	27	2	2	9
598	ChP	7	78	41	4	0	2	3	2	0	3	0	18	4	8	0	3	20	9	23	0	3	11	3	0	598	ChP	0	0	4	4	0	1	0	0	0	1	1	7	4	4	0	0	7	3	9	2	0	4
599	ChP	4	73	29	3	0	0	0	0	0	1	0	6	6	3	0	1	13	4	25	4	0	13	0	1	599	ChP	0	1	7	9	3	7	1	0	8	4	4	28	4	11	0	3	4	8	13	1	1	5
600	ChP	8	77	40	4	0	0	2	0	0	1	0	13	4	8	0	0	12	9	31	0	1	12	2	0	600	ChP	0	4	4	0	0	13	1	0	3	0	0	26	6	14	0	4	12	7	26	1	0	7
601	ChP	3	53	36	2	0	0	2	0	0	0	0	12	8	9	0	0	17	12	25	0	0	8	2	3	601	ChP	0	0	4	2	0	4	2	0	0	0	0	0	2	4	0	0	2	2	12	0	2	8
602	ChP	3	13	21	3	0	0	3	0	0	0	0	6	3	1	0	0	3	1	16	1	0	6	0	1	602	ChP	0	0	3	3	2	2	0	0	2	2	3	9	2	10	0	2	6	7	13	0	0	6
603	ChP	6	48	34	0	0	0	0	0	0	0	0	9	7	6	0	1	12	10	23	0	4	10	1	2	603	ChP	0	0	6	3	0	6	0	0	5	1	1	16	0	8	0	0	8	3	18	0	0	11
604	ChP	8	49	36	1	0	0	1	0	0	3	0	6	3	11	0	1	11	3	28	0	0	10	1	1	604	ChP	0	0	1	5	0	1	3	0	3	3	3	19	1	10	0	1	3	10	26	3	0	5
605	ChP	1	33	23	1	0	0	1	0	0	3	0	3	7	7	0	1	5	5	14	0	0	7	1	3	605	ChP	0	1	0	3	0	1	0	0	0	0	0	7	1	10	0	3	5	4	12	1	0	8
606	ChP	5	34	31	2	0	0	0	0	0	4	0	7	8	7	0	0	14	8	20	2	2	10	2	4	606	ChP	0	2	8	6	0	0	0	0	6	6	0	33	6	23	0	4	14	10	25	2	2	12
607	ChP	3	43	26	5	0	0	1	0	0	0	0	6	5	5	0	0	8	6	23	0	1	6	1	0	607	ChP	0	1	1	4	0	4	0	0	1	3	1	16	1	14	0	4	17	7	20	1	0	10
608	ChP	0	54	27	0	0	0	0	0	0	6	0	10	10	3	0	0	10	10	17	6	0	6	0	0	608	ChP	0	3	1	2	0	2	0	0	2	1	0	12	4	7	0	8	9	4	20	2	0	2
609	ChP	7	93	55	0	0	0	0	0	0	0	0	7	5	11	0	0	10	6	28	2	4	11	0	3	609	ChP	0	12	12	9	0	1	3	0	9	2	1	45	5	26	0	3	20	19	57	11	2	20
610	ChP	12	74	50	7	0	0	5	0	0	1	0	5	2	11	0	0	14	8	30	5	2	13	0	6	610	ChP	0	1	2	4	0	1	1	0	3	0	1	12	1	4	0	2	10	5	17	2	0	4
611	ChP	6	77	27	2	0	2	3	0	0	0	0	10	2	9	0	0	2	3	35	5	0	2	0	2	611	ChP	0	5	4	6	0	3	2	0	3	3	0	9	3	11	0	3	3	4	31	2	3	21
612	ChP	4	69	17	2	0	0	2	0	0	4	0	13	3	7	0	0	3	6	21	0	3	7	4	2	612	ChP	0	4	16	4	4	0	2	0	0	0	2	12	0	11	0	2	12	12	16	2	2	4
613	ChP	0	37	27	1	0	0	1	0	0	0	0	7	1	3	0	0	7	11	19	1	0	11	5	0	613	ChP	0	6	22	5	0	1	5	0	4	0	4	36	4	15	0	5	14	15	44	4	0	15
614	ChP	3	71	61	2	0	0	2	0	0	4	0	4	4	2	0	1	15	3	30	9	2	15	4	2	614	ChP	0	9	9	2	0	0	0	0	1	0	0	12	2	10	0	0	5	7	14	1	1	7
615	ChP	6	83	27	0	0	0	1	0	0	0	0	6	6	6	0	0	12	6	23	3	0	10	0	3	615	ChP	0	5	16	3	0	0	1	0	0	0	1	13	2	11	0	0	11	7	18	1	1	8
616	ChP	7	85	25	1	0	0	1	0	0	0	0	3	5	4	0	0	11	4	25	4	3	8	0	0	616	ChP	0	4	10	2	0	0	0	0	0	0	0	15	2	10	0	4	5	7	18	0	0	5
617	ChP	5	56	25	2	0	0	0	0	0	2	0	8	3	4	0	0	11	6	19	0	0	3	0	5	617	ChP	0	3	17	3	0	3	0	0	0	0	0	15	3	8	0	0	3	5	17	1	0	8
618	ChP	10	86	31	0	0	0	2	0	0	6	0	9	4	13	0	0	10	7	27	3	0	15	7	3	618	ChP	0	0	8	2	0	0	3	0	2	0	0	17	2	8	0	0	7	6	18	0	0	12
619	ChP	5	78	29	3	0	0	0	0	0	3	0	3	3	4	0	0	9	2	22	2	0	7	3	2	619	ChP	0	4	24	9	0	2	3	0	2	2	0	22	7	20	0	2	19	13	37	5	0	8
620	ChP	2	52	28	4	0	0	1	0	0	2	0	6	6	4	0	0	10	4	19	0	0	16	1	5	620	ChP	0	2	2	9	0	0	2	0	0	0	3	8	0	9	2	3	5	3	8	2	0	3
621	ChP	4	50	18	2	0	0	0	0	0	5	2	7	0	7	0	0	7	7	15	2	0	9	2	4	621	ChP	0	3	6	6	0	2	0	0	4	4	0	15	2	7	0	0	6	7	17	2	2	9
622	ChP	4	67	38	4	2	0	0	0	0	9	2	9	2	4	0	0	9	9	26	7	0	13	6	2	622	ChP	0	3	5	2	0	0	0	0	2	2	2	10	2	12	0	0	9	8	15	0	0	9
623	ChP	1	40	26	1	0	0	1	0	0	3	0	7	3	3	0	0	5	5	19	0	0	7	1	1	623	ChP	0	5	3	4	0	0	0	0	3	3	3	16	2	5	0	2	8	7	19	2	3	2
624	ChP	1	63	23	0	0	0	1	0	0	0	0	5	3	3	0	0	7	5	14	0	0	5	1	3	624	ChP	0	4	1	0	0	0	1	0	0	0	0	4	0	2	0	0	3	5	11	1	0	5
625	ChP	4	65	21	4	0	0	0	0	0	2	0	9	4	2	0	0	13	7	16	4	0	9	2	2	625	ChP	0	15	6	3	0	1	0	0	3	0	1	7	3	12	0	0	7	11	9	0	0	6
626	ChP	0	16	6	2	0	0	0	0	0	2	0	4	2	2	0	0	4	2	2	0	0	0	2	0	626	ChP	0	0	4	5	0	4	1	0	0	1	2	13	5	10	0	2	5	6	18	2	1	5
627	ChP	0	47	16	1	1	0	0	0	0	1	0	6	1	4	0	0	10	4	18	1	0	6	0	4	627	ChP	0	4	2	2	0	0	2	0	0	0	0	3	0	2	0	0	3	2	6	0	0	5
628	ChP	3	63	11	4	0	0	0	0	0	0	0	5	6	11	0	0	9	5	14	3	2	4	11	0	628	ChP	0	2	4	3	0	0	0	0	1	1	0	9	3	7	0	0	7	6	16	2	0	7
629	ChP	3	53	27	1	0	0	1	0	0	3	0	3	3	7	0	0	3	1	15	3	0	7	3	1	629	ChP	0	6	3	5	0	0	0	0	4	2	3	18	3	12	0	2	11	10	28	0	2	17
630	ChP	6	86	32	4	0	0	3	0	0	6	0	1	4	10	0	1	12	6	20	4	0	12	4	4	630	ChP	0	2	2	4	0	0	0	0	2	0	0	7	2	6	0	2	2	4	14	0	0	7
631	ChP	1	33	22	0	0	0	0	0	0	3	0	3	0	1	0	0	1	0	9	3	0	6	1	0	631	ChP	0	2	4	7	0	0	2	0	2	2	2	13	2	16	0	0	7	2	24	4	0	10
632	ChP	0	55	23	3	0	0	1	0	0	9	0	7	3	7	0	0	10	5	18	1	0	5	0	5	632	ChP	0	2	4	5	0	0	2	0	5	4	2	26	2	13	5	2	19	10	32	2	0	13
633	ChP	12	88	31	3	2	0	2	0	0	4	0	11	5	10	0	0	15	7	29	5	0	8	3	4	633	ChP	0	0	0	7	0	0	0	0	0	1	1	5	1	10	0	0	4	4	20	3	0	8
634	ChP	4	75	28	0	0	0	0	0	0	4	0	8	2	4	0	0	5	5	18	3	0	9	0	4	634	ChP	0	13	7	11	0	0	1	0	1	0	0	9	5	7	0	0	9	5	21	1	1	7
635	ChP	2	54	20	0	0	1	0	0	0	1	0	3	1	1	0	2	3	2	17	1	0	5	1	0	635	ChP	0	4	0	2	0	0	2	0	4	0	0	10	2	10	0	0	6	2	12	0	0	6
636	ChP	0	28	3	0	0	0	0	0	0	0	0	3	1	0	0	0	2	4	13	1	0	1	0	0	636	ChP	0	1	3	7	0	0	1	0	0	0	0	5	3	8	0	0	8	10	15	0	0	13
637	ChP	4	54	38	0	0	0	2	0	0	4	0	4	7	3	0	0	4	3	25	2	0	9	3	0	637	ChP	0	0	1	3	0	0	0	0	3	0	0	10	0	8	0	0	7	1	22	0	0	5
638	ChP	2	28	6	0	0	0	0	2	0	2	0	6	3	2	0	0	0	3	6	2	0	6	8	2	638	ChP	0	4	4	4	2	0	2	0	4	4	0	18	2	20	0	2	10	6	20	0	0	8
639	ChP	5	35	9	2	0	0	0	0	0	2	0	3	0	0	0	2	0	3	9	0	2	2	0	0	639	ChP	0	5	8	3	0	0	1	0	3	1	1	13	0	13	0	0	5	6	29	3	1	10
640	ChP	3	48	10	2	2	0	2	0	0	3	0	3	3	7	0	0	6	3	8	3	0	2	0	0	640	ChP	0	2	8	2	0	0	0	0	2	0	2	14	0	13	0	0	4	8	33	2	0	10
641	ChP	3	43	10	2	2	0	3	0	0	5	0	5	0	3	0	0	3	7	14	4	3	5	0	3	641	ChP	0	2	3	0	2	2	2	0	5	0	0	17	2	13	0	3	10	10	25	0	0	7
642	ChP	7	68	21	4	0	0	0	0	0	4	0	7	2	6	0	0	6	7	12	2	4	7	6	0	642	ChP	0	0	1	2	0	0	2	0	1	1	0	7	0	6	0	0	3	5	15	1	0	9
643	ChP	4	78	20	0	1	0	1	0	0	7	0	4	3	4	0	0	4	13	28	4	1	6	1	0	643	ChP	0	2	5	3	0	0	0	0	0	1	0	8	0	8	0	0	5	5	1	0	1	5
644	ChP	2	67	17	2	0	0	2	0	0	3	0	6	5	7	0	0	6	9	34	2	0	6	0	2	644	ChP	0	3	4	5	0	2	4	0	3	2	2	26	0	13	0	0	12	12	37	4	2	16
645	ChP	2	69	15	2	0	0	1	0	1	4	0	9	0	3	0	0	10	5	25	3	0	4	3	2	645	ChP	0	0	5	5	0	2	2	0	5	2	2	15	0	9	0	2	11	5	21	3	0	5
646	ChP	5	60	10	2	0	0	2	0	0	6	2	2	0	3	0	0	13	4	22	2	0	6	3	3	646	ChP	0	3	3	3	0	2	2	0	3	0	3	8	2	8	0	0	7	7	8	0	0	8
647	ChP	6	46	18	4	0	0	0	0	0	2	0	6	4	12	0	0	14	4	18	2	0	8	0	2	647	ChP	0	0	13	6	0	2	2	0	6	0	4	11	2	18	0	4	9	7	23	2	2	7
648	ChP	5	50	15	2	0	0	1	0	0	5	0	15	2	9	0	0	4	2	31	4	1	5	1	0	648	ChP	0	5	3	2	0	0	0	0	4	2	0	10	2	10	0	0	10	5	17	3	0	6
649	ChP	4	56	10	3	0	0	2	0	0	2	2	7	5	7	0	0	13	10	28	3	2	9	2	3	649	ChP	0	4	6	5	0	0	5	0	3	0	2	30	4	10	0	0	8	8	38	3	2	14
650	ChP	5	35	10	7	0	0	0	0	0	5	3	7	7	10	0	0	8	3	19	3	1	12	5	0	650	ChP	0	3	2	3	0	0	2	0	2	0	3	9	0	11	0	0	6	8	14	0	0	5
651	ChP	6	41	9	6	2	0	3	2	2	6	4	12	7	11	0	0	10	8	32	4	0	21	6	7	651	ChP	0	7	7	4	0	0	0	0	3	4	3	28	3	20	0	0	7	13	43	2	0	9
652	ChP	1	18	7	4	0	0	0	0	0	3	4	6	0	11	0	0	8	16	24	0	0	10	4	3	652	ChP	0	0	4	1	0	0	3	0	0	0	1	9	1	18	0	1	7	7	27	3	1	6
653	ChP	4	22	12	4	0	0	0	0	0	8	6	10	2	12	0	2	8	6	36	4	0	8	14	2	653	ChP	0	2	7	5	0	3	0	0	9	3	0	25	2	13	0	0	12	11	32	2	0	11
654	ChP	0	10	8	6	0	0	0	0	0	2	2	4	4	8	0	0	8	0	10	6	0	8	4	0	654	ChP	0	1	2	2	0	1	0	0	5	0	0	9	2	6	0	0	9	5	16	2	0	4
655	ChP	12	4	3	4	1	0	3	0	1	3	3	9	0	10	1	0	4	3	21	3	0	12	15	1	655	ChP	0	4	3	3	0	0	0	0	0	0	0	8	2	11	0	0	7	11	17	2	0	9
656	ChP	0	2	4	9	0	0	2	0	2	2	4	2	0	9	0	0	9	6	18	6	0	13	4	0	656	ChP	0	5	3	3	0	0	1	0	3	0	0	9	3	5	0	1	0	11	21	3	1	5
657	ChP	0	3	6	3	0	0	3	0	0	3	1	6	3	9	0	0	13	3	25	3	1	15	7	1	657	ChP	0	0	0	0	0	0	0	0	0	0	0	0	0	3	0	0	1	1	1	0	0	3
658	ChP	5	5	7	5	0	0	2	0	0	4	5	7	2	7	0	2	16	5	10	5	2	15	15	2	658	ChP	0	0	2	1	0	0	0	0	0	0	0	2	0	5	0	0	5	5	10	1	0	2
659	ChP	9	4	2	5	4	0	2	0	0	3	3	14	2	20	0	0	15	6	20	3	0	9	17	2	659	ChP	0	0	0	0	0	0	1	0	0	3	0	6	3	6	0	0	9	3	12	4	0	6
660	ChP	7	0	1	2	0	0	2	0	0	5	7	7	0	15	0	0	8	3	15	5	1	1	19	1	660	ChP	0	1	5	5	0	0	1	0	2	4	1	10	0	10	0	0	5	5	20	2	1	6
[truncated: 2 more columns]
